# Supplementary material for: Synthesis of pyrano[2,3-f]chromen-2-ones vs. pyrano[3,2-g]chromen-2-ones through site controlled gold-catalyzed annulations
Source: Royal Society of Chemistry journal article supplement (doi:10.1039/c9ob01695c), 2019-01-01
Supplement: c9ob01695c2.pdf [file c9ob01695c2.pdf]

```
+-----+
+
| Jaguar version 3.5, release 42
|
|
| Copyright 1991-1998 Schrodinger, Inc.
|
| All Rights Reserved.
|
|
| Use of this program should be acknowledged in publications as:
|
| Jaguar 3.5, Schrodinger, Inc., Portland, Oregon, 1998.
|
+-----+
--+
```

```
start of program pre
Job name: WF26536
Executables used: C:\USERS\GIANCARLO\GOOGLE
Temporary files : DRIVE\1.
```

```
Input file comments:
Molecule001
This file created by Spartan
```

```
basis set:          6-31G**
net molecular charge: 0
multiplicity:      1
```

```
number of basis functions....      375
```

```
Input geometry:
```

```
                                angstroms
atom          x                y                z
C10           0.4357510000      0.1832390000      -1.5127670000
C1            0.7742270000      0.2659640000      -0.0963000000
H2           -1.2029670000     -0.1536590000      0.6696490000
C2           -0.1531660000      0.0706740000      0.9218030000
C3            2.5315980000      0.6533160000      1.5820370000
C4            0.2271680000      0.1513410000      2.2692830000
C5            2.1168510000      0.5732050000      0.2493210000
C6            1.5743070000      0.4353910000      2.5837220000
C7           -0.7030100000     -0.0448790000      3.3525840000
C8           -0.2742860000      0.0419660000      4.6282810000
H6           -1.7537850000     -0.2628330000      3.1041150000
```

|     |               |               |               |
|-----|---------------|---------------|---------------|
| H7  | -0.9309380000 | -0.0964640000 | 5.4992220000  |
| C9  | 1.1203330000  | 0.3320870000  | 4.9261680000  |
| O2  | 1.6805300000  | 0.4452200000  | 6.0146870000  |
| O1  | 2.0285850000  | 0.5248890000  | 3.8799640000  |
| H13 | 3.5757630000  | 0.8783000000  | 1.8400280000  |
| O3  | 3.1047290000  | 0.7621910000  | -0.6887030000 |
| C11 | 1.3539090000  | 0.5723840000  | -2.4201670000 |
| C13 | -0.8757150000 | -0.3218640000 | -1.9224450000 |
| C12 | 2.6879200000  | 1.0788380000  | -2.0253410000 |
| H22 | 1.1549410000  | 0.5419510000  | -3.5014300000 |
| H23 | 2.7202020000  | 2.2006900000  | -2.1217190000 |
| H24 | 3.5004730000  | 0.6242620000  | -2.6587850000 |
| C14 | -3.3660920000 | -1.2937710000 | -2.7545210000 |
| C15 | -1.3325880000 | -1.5703330000 | -1.4775400000 |
| C16 | -1.6758400000 | 0.4331850000  | -2.7910060000 |
| C17 | -2.9166030000 | -0.0511740000 | -3.2007830000 |
| C18 | -2.5713040000 | -2.0526050000 | -1.8951140000 |
| H1  | -0.7039670000 | -2.1713440000 | -0.8025700000 |
| H3  | -1.3208010000 | 1.4124500000  | -3.1452270000 |
| H4  | -3.5408550000 | 0.5489730000  | -3.8791690000 |
| H5  | -2.9208650000 | -3.0359650000 | -1.5464000000 |
| H8  | -4.3445110000 | -1.6756250000 | -3.0808770000 |

Molecular weight: 276.08 amu

Stoichiometry: C18H12O3

Molecular Point Group: C1

Point Group used: C1

nuclear repulsion energy..... 1510.120695165 hartrees

Non-default options chosen:

Geometry will be optimized in redundant internal coordinates

Initial Hessian: from previous calculation

end of program pre

start of program onee

smallest eigenvalue of S: 3.253E-04

number of canonical orbitals..... 373

end of program onee

start of program hfig

initial wavefunction generated automatically from atomic wavefunctions

Irreducible Total no No of occupied orbitals

representation orbitals Shell\_1 Shell\_2 ...  
No Symm 373 72

-----  
Orbital occupation/shell 1.000

end of program hfig

start of program probe  
end of program probe

start of program grid

number of gridpoints:

| atom     | C10 | C1  | H2  | C2  | C3  | C4  | C5  | C6  |
|----------|-----|-----|-----|-----|-----|-----|-----|-----|
| grid # 1 | 90  | 87  | 71  | 88  | 89  | 91  | 87  | 85  |
| grid # 2 | 98  | 96  | 114 | 96  | 97  | 99  | 96  | 93  |
| grid # 3 | 192 | 197 | 203 | 185 | 186 | 200 | 185 | 186 |
| grid # 4 | 336 | 340 | 209 | 330 | 333 | 349 | 315 | 322 |

number of gridpoints:

| atom     | C7  | C8  | H6  | H7  | C9  | O2  | O1  | H13 |
|----------|-----|-----|-----|-----|-----|-----|-----|-----|
| grid # 1 | 86  | 85  | 73  | 73  | 83  | 111 | 110 | 73  |
| grid # 2 | 93  | 94  | 118 | 118 | 93  | 123 | 119 | 118 |
| grid # 3 | 187 | 187 | 216 | 224 | 171 | 270 | 250 | 224 |
| grid # 4 | 331 | 333 | 224 | 232 | 299 | 473 | 444 | 230 |

number of gridpoints:

| atom     | O3  | C11 | C13 | C12 | H22 | H23 | H24 | C14 |
|----------|-----|-----|-----|-----|-----|-----|-----|-----|
| grid # 1 | 111 | 88  | 91  | 80  | 71  | 71  | 71  | 89  |
| grid # 2 | 119 | 96  | 99  | 90  | 114 | 111 | 113 | 97  |
| grid # 3 | 253 | 184 | 195 | 162 | 219 | 222 | 221 | 187 |
| grid # 4 | 446 | 332 | 343 | 289 | 226 | 227 | 227 | 331 |

number of gridpoints:

| atom     | C15 | C16 | C17 | C18 | H1  | H3  | H4  | H5  |
|----------|-----|-----|-----|-----|-----|-----|-----|-----|
| grid # 1 | 88  | 88  | 89  | 89  | 71  | 71  | 73  | 73  |
| grid # 2 | 96  | 95  | 97  | 96  | 115 | 115 | 118 | 118 |
| grid # 3 | 184 | 184 | 186 | 185 | 219 | 219 | 224 | 224 |
| grid # 4 | 329 | 330 | 330 | 330 | 224 | 225 | 232 | 232 |

number of gridpoints:

| atom     | H8  | total |
|----------|-----|-------|
| grid # 1 | 73  | 2769  |
| grid # 2 | 118 | 3472  |
| grid # 3 | 224 | 6755  |
| grid # 4 | 232 | 9985  |

end of program grid

start of program rwr

end of program rwr

start of program scf

|                               |     |
|-------------------------------|-----|
| number of electrons.....      | 144 |
| number of alpha electrons.... | 72  |
| number of beta electrons..... | 72  |
| number of orbitals, total.... | 373 |
| number of core orbitals.....  | 72  |
| number of open shell orbs.... | 0   |
| number of occupied orbitals.. | 72  |
| number of virtual orbitals... | 301 |
| number of hamiltonians.....   | 1   |
| number of shells.....         | 1   |

SCF type: HF

|      | i  | u | d | i | g |                  | energy   | RMS     | maximum |
|------|----|---|---|---|---|------------------|----------|---------|---------|
|      | t  | p | i | c | r |                  | change   | density | DIIS    |
|      | e  | d | i | u | i |                  |          | change  | error   |
|      | r  | t | s | t | d | total energy     |          |         |         |
| etot | 1  | N | N | 5 | M | -910.21666520308 |          | 4.6E-03 | 1.5E-01 |
| etot | 2  | Y | Y | 6 | M | -912.88595463096 | 2.7E+00  | 1.8E-03 | 7.3E-02 |
| etot | 3  | Y | Y | 6 | M | -913.13737267583 | 2.5E-01  | 7.3E-04 | 4.3E-02 |
| etot | 4  | N | Y | 2 | U | -913.18777122062 | 5.0E-02  | 5.2E-04 | 1.8E-02 |
| etot | 5  | Y | Y | 6 | M | -913.19693502452 | 9.2E-03  | 1.3E-03 | 1.2E-02 |
| etot | 6  | N | Y | 2 | U | -913.20476585040 | 7.8E-03  | 1.6E-04 | 2.5E-03 |
| etot | 7  | Y | Y | 6 | M | -913.20515394837 | 3.9E-04  | 6.8E-05 | 7.1E-04 |
| etot | 8  | Y | Y | 6 | M | -913.20523340549 | 7.9E-05  | 1.3E-05 | 2.3E-04 |
| etot | 9  | N | Y | 2 | U | -913.20515536868 | -7.8E-05 | 8.4E-06 | 1.1E-04 |
| etot | 10 | Y | Y | 6 | M | -913.20515826065 | 2.9E-06  | 4.9E-06 | 3.5E-05 |
| etot | 11 | Y | N | 6 | M | -913.20516076141 | 2.5E-06  | 0.0E+00 | 0.0E+00 |

Energy components, in hartrees:

|     |                               |                   |       |
|-----|-------------------------------|-------------------|-------|
| (A) | Nuclear repulsion.....        | 1510.12069516477  |       |
| (E) | Total one-electron terms..... | -4242.83594488963 |       |
| (I) | Total two-electron terms..... | 1819.51008896346  |       |
| (L) | Electronic energy.....        | -2423.32585592617 | (E+I) |
| (N) | Total energy.....             | -913.20516076141  | (A+L) |

SCFE: SCF energy: HF -913.20516076141 hartrees iterations: 11

HOMO energy: -0.28697  
LUMO energy: 0.06700

Orbital energies:

|           |           |           |           |           |           |
|-----------|-----------|-----------|-----------|-----------|-----------|
| -20.63185 | -20.60745 | -20.53598 | -11.38849 | -11.33592 | -11.33283 |
| -11.31208 | -11.29365 | -11.27363 | -11.26479 | -11.26155 | -11.25986 |
| -11.25978 | -11.25860 | -11.25282 | -11.25235 | -11.25215 | -11.25159 |
| -11.25109 | -11.25021 | -11.24766 | -1.46405  | -1.42071  | -1.34452  |
| -1.18785  | -1.16806  | -1.12538  | -1.11029  | -1.03890  | -1.03278  |
| -1.02476  | -1.02049  | -0.93322  | -0.89392  | -0.87805  | -0.86159  |
| -0.83612  | -0.82751  | -0.78669  | -0.73725  | -0.72686  | -0.71041  |
| -0.68524  | -0.68157  | -0.66618  | -0.65794  | -0.64729  | -0.64129  |
| -0.63695  | -0.63184  | -0.61245  | -0.60233  | -0.59451  | -0.59105  |
| -0.58675  | -0.57883  | -0.54774  | -0.53896  | -0.52371  | -0.51761  |
| -0.51270  | -0.50210  | -0.50062  | -0.49129  | -0.47610  | -0.44441  |
| -0.43864  | -0.38771  | -0.34978  | -0.34405  | -0.32753  | -0.28697  |
| 0.06700   | 0.08957   | 0.12050   | 0.12745   | 0.15468   | 0.20730   |
| 0.22351   | 0.22867   | 0.23850   | 0.25984   |           |           |

end of program scf

start of program derla  
end of program derla

start of program rwr  
recomputing RwR matrix 17 grid: 4  
end of program rwr

start of program derlb

forces (hartrees/bohr) : total

| atom | label | x             | y             | z             |
|------|-------|---------------|---------------|---------------|
| 1    | C10   | 2.916770E-02  | 1.074906E-02  | -2.798132E-02 |
| 2    | C1    | 8.999028E-03  | 2.205580E-03  | 1.559231E-02  |
| 3    | H2    | 2.042971E-02  | 5.162653E-03  | 5.998974E-03  |
| 4    | C2    | 3.974762E-04  | 1.677696E-03  | -9.242467E-04 |
| 5    | C3    | -7.164929E-03 | -1.576973E-03 | -1.518284E-03 |
| 6    | C4    | 1.241098E-02  | 2.782811E-03  | -5.231884E-03 |
| 7    | C5    | 2.014092E-02  | 1.942718E-03  | 6.664503E-03  |
| 8    | C6    | 1.466640E-02  | 3.474338E-03  | 7.177619E-04  |
| 9    | C7    | -4.635896E-03 | -9.675423E-04 | 1.481055E-02  |
| 10   | C8    | -1.791523E-02 | -3.734257E-03 | 3.291916E-03  |

|       |       |               |               |               |
|-------|-------|---------------|---------------|---------------|
| 11    | H6    | 1.683825E-02  | 3.472495E-03  | 6.789925E-03  |
| 12    | H7    | 1.228038E-02  | 2.577919E-03  | -1.539383E-02 |
| 13    | C9    | 8.717321E-02  | 1.795750E-02  | 5.583692E-02  |
| 14    | O2    | -5.762859E-02 | -1.175894E-02 | -5.606745E-02 |
| 15    | O1    | -5.534046E-02 | -1.145966E-02 | -2.188651E-02 |
| 16    | H13   | -1.845024E-02 | -3.927563E-03 | -4.793097E-03 |
| 17    | O3    | -4.007071E-02 | -5.487638E-03 | 5.118904E-03  |
| 18    | C11   | -2.541979E-02 | -1.276401E-02 | 3.414058E-03  |
| 19    | C13   | -1.991052E-02 | -5.445653E-03 | -1.067803E-02 |
| 20    | C12   | 3.898664E-02  | 1.571113E-02  | -1.676969E-03 |
| 21    | H22   | 1.276307E-03  | -1.438188E-03 | 1.736769E-02  |
| 22    | H23   | 2.427076E-03  | -2.307947E-02 | -1.658461E-03 |
| 23    | H24   | -2.116158E-02 | 1.547838E-02  | 1.087154E-02  |
| 24    | C14   | -7.437388E-03 | -1.828324E-03 | -3.088247E-03 |
| 25    | C15   | 7.216648E-04  | -4.845033E-03 | 1.868705E-03  |
| 26    | C16   | 5.964351E-04  | 3.294244E-03  | -1.675059E-03 |
| 27    | C17   | -5.228342E-03 | 3.142618E-03  | -5.769273E-03 |
| 28    | C18   | -1.605187E-03 | -7.698077E-03 | 3.154365E-03  |
| 29    | H1    | -1.047515E-02 | 9.385674E-03  | -1.173481E-02 |
| 30    | H3    | -5.933306E-03 | -1.553493E-02 | 6.817855E-03  |
| 31    | H4    | 9.592431E-03  | -9.360433E-03 | 1.063314E-02  |
| 32    | H5    | 5.553480E-03  | 1.536652E-02  | -5.637283E-03 |
| 33    | H8    | 1.515776E-02  | 6.000173E-03  | 5.210168E-03  |
| ----- |       | -----         | -----         | -----         |
|       | total | -1.561441E-03 | -5.251818E-04 | -1.555476E-03 |

end of program derlb

start of program geopt 1

geometry optimization step 1  
 reading input hessian of dimension 99  
 in five columns format

Level shifts adjusted to satisfy step-size constraints  
 Step size: 0.3007162  
 Cos(theta): 0.9150272

Final level shift: -9.7502445E-02

gradient maximum: 7.6908E-02 . ( 4.5000E-04 )  
 gradient rms: 1.4007E-02 . ( 3.0000E-04 )  
 step size: 0.30071 trust radius: 0.30000  
 displacement maximum: 1.1516E-01 . ( 1.8000E-03 )  
 displacement rms: 2.6789E-02 . ( 1.2000E-03 )

predicted energy change: -2.6039E-02 geom step: 3.0071E-01  
full step: 3.0071E-01  
molecular structure not yet converged...

center of mass moved by:  
x: -1.0577E-02 y: 5.0120E-03 z: -4.4406E-05

new geometry:

|      | angstroms     |               |               |
|------|---------------|---------------|---------------|
| atom | x             | y             | z             |
| C10  | 0.4512124238  | 0.1688457941  | -1.5224329939 |
| C1   | 0.7921211215  | 0.2615808321  | -0.0842264455 |
| H2   | -1.1472972907 | -0.1513504583 | 0.7031670991  |
| C2   | -0.1207490422 | 0.0706080601  | 0.9409234318  |
| C3   | 2.5256907049  | 0.6553431718  | 1.5848621593  |
| C4   | 0.2485104596  | 0.1519224795  | 2.2784662912  |
| C5   | 2.1238891844  | 0.5709004600  | 0.2658257701  |
| C6   | 1.5810566024  | 0.4417288441  | 2.5884625579  |
| C7   | -0.6608260819 | -0.0432468202 | 3.3794325905  |
| C8   | -0.2327746255 | 0.0577976746  | 4.6382051063  |
| H6   | -1.6947195809 | -0.2676825112 | 3.1644362932  |
| H7   | -0.8697956689 | -0.0757161094 | 5.4982047633  |
| C9   | 1.1693212088  | 0.3650867061  | 4.9347668341  |
| O2   | 1.5826151267  | 0.4756991106  | 6.0340850771  |
| O1   | 2.0052150834  | 0.5396750483  | 3.8716656224  |
| H13  | 3.5500170868  | 0.8803469990  | 1.8346530330  |
| O3   | 3.0729754986  | 0.7514822167  | -0.6686642012 |
| C11  | 1.3646937940  | 0.5548066839  | -2.4105102366 |
| C13  | -0.8866349883 | -0.3360836769 | -1.9487296385 |
| C12  | 2.7056901839  | 1.0739109465  | -2.0071470736 |
| H22  | 1.1726155090  | 0.5060162330  | -3.4721969872 |
| H23  | 2.7642184645  | 2.1625823825  | -2.1356069458 |
| H24  | 3.4833437420  | 0.6241836289  | -2.6318819608 |
| C14  | -3.3759421929 | -1.2949218331 | -2.7848093406 |
| C15  | -1.3388323708 | -1.5919161542 | -1.5406455408 |
| C16  | -1.6951446294 | 0.4274012147  | -2.7831937736 |
| C17  | -2.9316600927 | -0.0465596132 | -3.2011715896 |
| C18  | -2.5744384187 | -2.0693314804 | -1.9533894569 |
| H1   | -0.7074474452 | -2.2013439794 | -0.9164164643 |
| H3   | -1.3641089044 | 1.4019728594  | -3.0805857235 |
| H4   | -3.5566692396 | 0.5583252160  | -3.8314782788 |
| H5   | -2.9109358054 | -3.0482514011 | -1.6356097056 |
| H8   | -4.3405179107 | -1.6613352236 | -3.1076847407 |

nuclear repulsion energy..... 1515.070753123 hartrees

-----  
/ end of geometry optimization iteration 1 /  
-----

end of program geopt

start of program onee

smallest eigenvalue of S: 2.977E-04

number of canonical orbitals..... 373

end of program onee

start of program probe

end of program probe

start of program grid

number of gridpoints:

| atom     | C10 | C1  | H2  | C2  | C3  | C4  | C5  | C6  |
|----------|-----|-----|-----|-----|-----|-----|-----|-----|
| grid # 1 | 92  | 89  | 71  | 86  | 89  | 88  | 86  | 85  |
| grid # 2 | 100 | 99  | 115 | 96  | 97  | 99  | 94  | 95  |
| grid # 3 | 192 | 199 | 203 | 183 | 184 | 201 | 182 | 184 |
| grid # 4 | 340 | 346 | 203 | 327 | 330 | 348 | 315 | 314 |

number of gridpoints:

| atom     | C7  | C8  | H6  | H7  | C9  | O2  | O1  | H13 |
|----------|-----|-----|-----|-----|-----|-----|-----|-----|
| grid # 1 | 86  | 88  | 73  | 73  | 79  | 111 | 108 | 73  |
| grid # 2 | 93  | 95  | 118 | 118 | 89  | 123 | 118 | 118 |
| grid # 3 | 186 | 185 | 217 | 224 | 170 | 270 | 248 | 224 |
| grid # 4 | 326 | 333 | 218 | 223 | 285 | 467 | 442 | 222 |

number of gridpoints:

| atom     | O3  | C11 | C13 | C12 | H22 | H23 | H24 | C14 |
|----------|-----|-----|-----|-----|-----|-----|-----|-----|
| grid # 1 | 110 | 87  | 91  | 77  | 71  | 71  | 70  | 89  |
| grid # 2 | 119 | 94  | 100 | 89  | 114 | 112 | 112 | 97  |
| grid # 3 | 250 | 180 | 195 | 158 | 219 | 222 | 218 | 185 |
| grid # 4 | 444 | 327 | 338 | 283 | 218 | 226 | 224 | 327 |

number of gridpoints:

| atom     | C15 | C16 | C17 | C18 | H1  | H3  | H4  | H5  |
|----------|-----|-----|-----|-----|-----|-----|-----|-----|
| grid # 1 | 87  | 87  | 89  | 89  | 71  | 71  | 73  | 73  |
| grid # 2 | 96  | 95  | 97  | 96  | 115 | 115 | 118 | 118 |
| grid # 3 | 183 | 183 | 185 | 184 | 218 | 218 | 223 | 224 |
| grid # 4 | 328 | 329 | 329 | 329 | 218 | 218 | 224 | 224 |

number of gridpoints:

| atom     | H8  | total |
|----------|-----|-------|
| grid # 1 | 73  | 2756  |
| grid # 2 | 118 | 3472  |

grid # 3        223    6720  
grid # 4        224    9849

end of program grid

start of program rwr  
recomputing RwR matrix 15    grid: 4  
end of program rwr

start of program scf

|      | i | u | d | i | g |                  | energy  | RMS     | maximum |
|------|---|---|---|---|---|------------------|---------|---------|---------|
|      | t | p | i | c | r |                  | change  | density | DIIS    |
|      | e | d | i | u | i |                  |         | change  | error   |
|      | r | t | s | t | d | total energy     |         |         |         |
| etot | 1 | N | N | 2 | U | -913.21155876481 |         | 4.0E-04 | 8.8E-03 |
| etot | 2 | Y | Y | 6 | M | -913.22641842379 | 1.5E-02 | 1.3E-04 | 2.8E-03 |
| etot | 3 | N | Y | 2 | U | -913.22778691100 | 1.4E-03 | 4.9E-05 | 1.1E-03 |
| etot | 4 | Y | Y | 6 | M | -913.22803207910 | 2.5E-04 | 2.1E-05 | 3.7E-04 |
| etot | 5 | Y | Y | 6 | M | -913.22806740979 | 3.5E-05 | 7.6E-06 | 1.4E-04 |
| etot | 6 | Y | Y | 6 | M | -913.22807567467 | 8.3E-06 | 3.1E-06 | 4.6E-05 |
| etot | 7 | Y | N | 6 | M | -913.22807758956 | 1.9E-06 | 0.0E+00 | 0.0E+00 |

Energy components, in hartrees:

(A) Nuclear repulsion..... 1515.07075312255  
(E) Total one-electron terms..... -4252.64946376541  
(I) Total two-electron terms..... 1824.35063305330  
(L) Electronic energy..... -2428.29883071211 (E+I)  
(N) Total energy..... -913.22807758956 (A+L)

SCFE: SCF energy: HF        -913.22807758956 hartrees    iterations:    7

HOMO energy:        -0.28739  
LUMO energy:        0.08229

Orbital energies:

|           |           |           |           |           |           |
|-----------|-----------|-----------|-----------|-----------|-----------|
| -20.63255 | -20.60418 | -20.54057 | -11.38153 | -11.33136 | -11.32547 |
| -11.30720 | -11.27650 | -11.26427 | -11.26358 | -11.25608 | -11.25436 |
| -11.25239 | -11.24689 | -11.24660 | -11.24544 | -11.24507 | -11.24487 |
| -11.24442 | -11.24357 | -11.23941 | -1.48444  | -1.43278  | -1.38300  |
| -1.18643  | -1.16966  | -1.12158  | -1.11133  | -1.04318  | -1.03465  |
| -1.02636  | -1.02028  | -0.93785  | -0.89917  | -0.87613  | -0.86339  |
| -0.83981  | -0.83197  | -0.79330  | -0.74333  | -0.72854  | -0.71337  |

|          |          |          |          |          |          |
|----------|----------|----------|----------|----------|----------|
| -0.68904 | -0.68742 | -0.67146 | -0.66457 | -0.66082 | -0.64432 |
| -0.63866 | -0.63294 | -0.61843 | -0.61209 | -0.59734 | -0.59338 |
| -0.58947 | -0.57987 | -0.55361 | -0.54270 | -0.52538 | -0.51595 |
| -0.51368 | -0.50984 | -0.50240 | -0.49510 | -0.46993 | -0.44159 |
| -0.44118 | -0.38970 | -0.34816 | -0.34391 | -0.32687 | -0.28739 |
| 0.08229  | 0.09640  | 0.12566  | 0.13100  | 0.16596  | 0.21154  |
| 0.23106  | 0.24141  | 0.24548  | 0.26912  |          |          |

end of program scf

start of program derla  
end of program derla

start of program rwr  
recomputing RWR matrix 15 grid: 4  
end of program rwr

start of program der1b

forces (hartrees/bohr) : total

| atom | label | x             | y             | z             |
|------|-------|---------------|---------------|---------------|
| 1    | C10   | 5.583508E-03  | 3.106099E-03  | -5.165140E-03 |
| 2    | C1    | -1.052063E-04 | 1.575574E-04  | 5.066899E-03  |
| 3    | H2    | 2.275832E-03  | 7.324116E-04  | 4.400547E-04  |
| 4    | C2    | 1.948392E-03  | 9.853129E-04  | -6.545237E-03 |
| 5    | C3    | -4.335519E-03 | -1.135048E-03 | 8.655024E-03  |
| 6    | C4    | 1.209040E-02  | 2.804192E-03  | 1.871452E-03  |
| 7    | C5    | -1.028457E-03 | -9.966184E-04 | -2.261382E-03 |
| 8    | C6    | 3.137986E-03  | 1.179437E-03  | -7.669662E-03 |
| 9    | C7    | -5.670024E-03 | -6.121499E-04 | 6.758296E-03  |
| 10   | C8    | -3.902183E-03 | -1.801476E-03 | -3.444714E-03 |
| 11   | H6    | 2.085378E-03  | 4.204867E-04  | 6.294599E-04  |
| 12   | H7    | 3.010185E-03  | 6.066332E-04  | -4.104963E-03 |
| 13   | C9    | -8.018253E-03 | 3.871076E-04  | -4.914014E-03 |
| 14   | O2    | 1.103543E-02  | 1.532791E-03  | 3.975380E-03  |
| 15   | O1    | -6.676625E-03 | -2.198698E-03 | 3.859042E-04  |
| 16   | H13   | -4.028019E-03 | -6.882326E-04 | -1.174017E-03 |
| 17   | O3    | -6.419762E-03 | 5.118435E-04  | -4.809680E-03 |
| 18   | C11   | -8.037853E-03 | -3.338174E-03 | 2.359674E-03  |
| 19   | C13   | -8.693819E-04 | -3.099082E-03 | -8.497357E-04 |
| 20   | C12   | 1.121042E-02  | 9.991985E-04  | 1.092542E-03  |
| 21   | H22   | -4.040073E-04 | -4.679630E-04 | 3.140904E-03  |
| 22   | H23   | -4.295993E-04 | -5.801171E-03 | 1.514104E-03  |

|       |       |               |               |               |
|-------|-------|---------------|---------------|---------------|
| 23    | H24   | -4.898012E-03 | 4.567906E-03  | 4.260826E-03  |
| 24    | C14   | -2.820637E-04 | 6.919352E-04  | -8.966144E-04 |
| 25    | C15   | -1.056946E-03 | -1.280472E-03 | -2.026571E-03 |
| 26    | C16   | -3.008021E-03 | -2.032519E-03 | 1.576360E-03  |
| 27    | C17   | 8.102599E-05  | -4.388681E-03 | 3.676443E-03  |
| 28    | C18   | -8.745572E-05 | -1.101381E-03 | -5.434020E-04 |
| 29    | H1    | -1.375205E-03 | 2.713185E-04  | 1.391319E-04  |
| 30    | H3    | 6.666352E-04  | 2.708325E-03  | -1.700593E-03 |
| 31    | H4    | 2.661461E-04  | 1.059843E-03  | -1.243958E-03 |
| 32    | H5    | 2.054686E-03  | 4.660961E-03  | -1.216580E-03 |
| 33    | H8    | 3.611233E-03  | 1.182264E-03  | 1.445501E-03  |
| ----- |       | -----         | -----         | -----         |
|       | total | -1.575320E-03 | -3.760424E-04 | -1.578307E-03 |

end of program derlb

start of program geopt 2

geometry optimization step 2

reading input hessian of dimension 99

in five columns format

energy change: -2.2917E-02 . ( 5.0000E-05 )  
 gradient maximum: 1.9961E-02 . ( 4.5000E-04 )  
 gradient rms: 3.3667E-03 . ( 3.0000E-04 )  
 step size: 0.25542 trust radius: 0.30000  
 displacement maximum: 1.1645E-01 . ( 1.8000E-03 )  
 displacement rms: 2.2755E-02 . ( 1.2000E-03 )  
 predicted energy change: -2.0854E-03 geom step: 2.5542E-01  
 full step: 2.5542E-01  
 molecular structure not yet converged...

center of mass moved by:

x: 2.8510E-03 y: -1.6883E-02 z: -1.7463E-04

new geometry:

|      | angstroms     |               |               |
|------|---------------|---------------|---------------|
| atom | x             | y             | z             |
| C10  | 0.4392209799  | 0.1856751829  | -1.5217711831 |
| C1   | 0.7708351698  | 0.2902608670  | -0.0793577309 |
| H2   | -1.1717642266 | -0.0216863582 | 0.7087102752  |
| C2   | -0.1402835425 | 0.1546543374  | 0.9415457632  |
| C3   | 2.5228217163  | 0.6106688595  | 1.5917780330  |
| C4   | 0.2410166620  | 0.2190263312  | 2.2841114611  |
| C5   | 2.1113981575  | 0.5430694305  | 0.2713760251  |
| C6   | 1.5801712550  | 0.4420633833  | 2.5854784458  |

|     |               |               |               |
|-----|---------------|---------------|---------------|
| C7  | -0.6742001692 | 0.0556667905  | 3.3990022104  |
| C8  | -0.2302799943 | 0.1146950692  | 4.6535777529  |
| H6  | -1.7135964765 | -0.1186263482 | 3.1879011569  |
| H7  | -0.8584287078 | -0.0006148542 | 5.5109933159  |
| C9  | 1.1878472177  | 0.3524884520  | 4.9460927421  |
| O2  | 1.6677534875  | 0.4176357095  | 6.0230418187  |
| O1  | 2.0024818480  | 0.4994950957  | 3.8678272576  |
| H13 | 3.5507348814  | 0.7879775183  | 1.8340651253  |
| O3  | 3.0575748791  | 0.6788017974  | -0.6700027776 |
| C11 | 1.3540882069  | 0.5545324339  | -2.4031589848 |
| C13 | -0.8952391538 | -0.3334195672 | -1.9503842104 |
| C12 | 2.6955341114  | 1.0814805320  | -1.9858429893 |
| H22 | 1.1698212453  | 0.4890907878  | -3.4588902188 |
| H23 | 2.7259372517  | 2.1752020993  | -2.0442724865 |
| H24 | 3.4734046586  | 0.7005081911  | -2.6395155375 |
| C14 | -3.3654889785 | -1.3216522287 | -2.8072815539 |
| C15 | -1.3152205255 | -1.6100131581 | -1.5845420996 |
| C16 | -1.7286421163 | 0.4381339273  | -2.7505683550 |
| C17 | -2.9575121622 | -0.0539270757 | -3.1752993605 |
| C18 | -2.5376750181 | -2.0995192043 | -2.0182317001 |
| H1  | -0.6743269994 | -2.2275518880 | -0.9725617572 |
| H3  | -1.4168582416 | 1.4311688628  | -3.0429567174 |
| H4  | -3.5891265153 | 0.5614952719  | -3.8029006529 |
| H5  | -2.8343304910 | -3.0900509565 | -1.7506133278 |
| H8  | -4.3127629303 | -1.6994189314 | -3.1435253747 |

nuclear repulsion energy..... 1516.146086422 hartrees

-----  
 / end of geometry optimization iteration 2 /  
 -----

end of program geopt

start of program onee  
 smallest eigenvalue of S: 2.919E-04  
 number of canonical orbitals..... 373  
 end of program onee

start of program probe  
 end of program probe

start of program grid

number of gridpoints:  
 atom C10 C1 H2 C2 C3 C4 C5 C6

|          |     |     |     |     |     |     |     |     |
|----------|-----|-----|-----|-----|-----|-----|-----|-----|
| grid # 1 | 92  | 90  | 71  | 86  | 89  | 93  | 87  | 89  |
| grid # 2 | 100 | 98  | 115 | 96  | 97  | 101 | 94  | 97  |
| grid # 3 | 192 | 198 | 208 | 181 | 183 | 199 | 182 | 184 |
| grid # 4 | 340 | 340 | 204 | 328 | 328 | 341 | 311 | 308 |

number of gridpoints:

|          |     |     |     |     |     |     |     |     |
|----------|-----|-----|-----|-----|-----|-----|-----|-----|
| atom     | C7  | C8  | H6  | H7  | C9  | O2  | O1  | H13 |
| grid # 1 | 85  | 88  | 73  | 73  | 79  | 111 | 108 | 73  |
| grid # 2 | 93  | 95  | 118 | 118 | 89  | 123 | 118 | 118 |
| grid # 3 | 186 | 185 | 218 | 224 | 169 | 270 | 248 | 224 |
| grid # 4 | 326 | 333 | 218 | 223 | 286 | 467 | 443 | 222 |

number of gridpoints:

|          |     |     |     |     |     |     |     |     |
|----------|-----|-----|-----|-----|-----|-----|-----|-----|
| atom     | O3  | C11 | C13 | C12 | H22 | H23 | H24 | C14 |
| grid # 1 | 111 | 87  | 92  | 79  | 72  | 70  | 70  | 89  |
| grid # 2 | 120 | 94  | 100 | 89  | 114 | 112 | 112 | 97  |
| grid # 3 | 250 | 182 | 195 | 157 | 220 | 222 | 218 | 184 |
| grid # 4 | 443 | 324 | 340 | 284 | 219 | 226 | 223 | 328 |

number of gridpoints:

|          |     |     |     |     |     |     |     |     |
|----------|-----|-----|-----|-----|-----|-----|-----|-----|
| atom     | C15 | C16 | C17 | C18 | H1  | H3  | H4  | H5  |
| grid # 1 | 88  | 87  | 89  | 89  | 72  | 72  | 73  | 73  |
| grid # 2 | 96  | 95  | 97  | 96  | 115 | 115 | 118 | 118 |
| grid # 3 | 184 | 183 | 183 | 184 | 219 | 219 | 223 | 222 |
| grid # 4 | 327 | 326 | 327 | 327 | 219 | 218 | 224 | 224 |

number of gridpoints:

|          |     |       |
|----------|-----|-------|
| atom     | H8  | total |
| grid # 1 | 73  | 2773  |
| grid # 2 | 118 | 3476  |
| grid # 3 | 223 | 6719  |
| grid # 4 | 224 | 9821  |

end of program grid

start of program rwr

end of program rwr

start of program scf

|      |   |   |   |   |              |                  |         |         |
|------|---|---|---|---|--------------|------------------|---------|---------|
| i    | u | d | i | g |              |                  |         |         |
| t    | p | i | c | r |              |                  |         |         |
| e    | d | i | u | i | energy       | RMS              | maximum |         |
| r    | t | s | t | d | change       | density          | DIIS    |         |
|      |   |   |   |   | total energy | change           | error   |         |
| etot | 1 | N | N | 2 | U            | -913.21248679035 | 3.0E-04 | 6.9E-03 |

|      |   |   |   |   |   |                  |         |         |         |
|------|---|---|---|---|---|------------------|---------|---------|---------|
| etot | 2 | Y | Y | 6 | M | -913.22749400166 | 1.5E-02 | 1.3E-04 | 2.6E-03 |
| etot | 3 | N | Y | 2 | U | -913.22940043296 | 1.9E-03 | 3.7E-05 | 6.5E-04 |
| etot | 4 | Y | Y | 6 | M | -913.22952527069 | 1.2E-04 | 1.8E-05 | 3.0E-04 |
| etot | 5 | Y | Y | 6 | M | -913.22955524403 | 3.0E-05 | 6.2E-06 | 1.2E-04 |
| etot | 6 | Y | Y | 6 | M | -913.22955890201 | 3.7E-06 | 3.2E-06 | 5.7E-05 |
| etot | 7 | Y | N | 6 | M | -913.22956003487 | 1.1E-06 | 0.0E+00 | 0.0E+00 |

Energy components, in hartrees:

|     |                               |                   |       |
|-----|-------------------------------|-------------------|-------|
| (A) | Nuclear repulsion.....        | 1516.14608642233  |       |
| (E) | Total one-electron terms..... | -4254.81593873146 |       |
| (I) | Total two-electron terms..... | 1825.44029227425  |       |
| (L) | Electronic energy.....        | -2429.37564645721 | (E+I) |
| (N) | Total energy.....             | -913.22956003487  | (A+L) |

SCFE: SCF energy: HF -913.22956003487 hartrees iterations: 7

HOMO energy: -0.28993

LUMO energy: 0.08200

Orbital energies:

|           |           |           |           |           |           |
|-----------|-----------|-----------|-----------|-----------|-----------|
| -20.62825 | -20.60330 | -20.53984 | -11.38135 | -11.32768 | -11.32468 |
| -11.30631 | -11.27806 | -11.26288 | -11.26277 | -11.25552 | -11.25270 |
| -11.25193 | -11.24522 | -11.24502 | -11.24477 | -11.24468 | -11.24381 |
| -11.24283 | -11.24155 | -11.23684 | -1.48501  | -1.43408  | -1.38029  |
| -1.18724  | -1.17074  | -1.12205  | -1.11237  | -1.04494  | -1.03655  |
| -1.02606  | -1.02060  | -0.93966  | -0.89883  | -0.87714  | -0.86467  |
| -0.84000  | -0.83205  | -0.79364  | -0.74513  | -0.72932  | -0.71437  |
| -0.69132  | -0.68741  | -0.67176  | -0.66454  | -0.66060  | -0.64415  |
| -0.63832  | -0.63398  | -0.61888  | -0.61430  | -0.59574  | -0.59440  |
| -0.59073  | -0.58008  | -0.55364  | -0.54281  | -0.52604  | -0.51469  |
| -0.51291  | -0.50953  | -0.50235  | -0.49342  | -0.46678  | -0.44223  |
| -0.44014  | -0.39111  | -0.34867  | -0.34486  | -0.32764  | -0.28993  |
| 0.08200   | 0.09970   | 0.12785   | 0.13186   | 0.16499   | 0.21130   |
| 0.23115   | 0.24235   | 0.24805   | 0.27064   |           |           |

end of program scf

start of program derla

end of program derla

start of program rwr

recomputing RWR matrix 15 grid: 4

end of program rwr

start of program der1b

forces (hartrees/bohr) : total

| atom  | label | x             | y             | z             |
|-------|-------|---------------|---------------|---------------|
| 1     | C10   | -2.415077E-03 | -3.596675E-04 | 3.197521E-03  |
| 2     | C1    | 5.139750E-03  | 1.651357E-03  | -1.918400E-03 |
| 3     | H2    | -1.916664E-03 | -3.999507E-04 | -3.005319E-04 |
| 4     | C2    | -1.740224E-03 | -1.157083E-03 | 6.249496E-03  |
| 5     | C3    | -5.516157E-04 | 1.766714E-04  | -6.123009E-03 |
| 6     | C4    | -1.420135E-03 | 6.063688E-04  | -5.348630E-04 |
| 7     | C5    | 1.530547E-03  | 1.277084E-04  | -4.044902E-04 |
| 8     | C6    | -4.163676E-03 | -1.702017E-03 | 4.288094E-03  |
| 9     | C7    | 3.377354E-03  | 4.827974E-04  | -1.229130E-03 |
| 10    | C8    | 1.389819E-03  | 9.255633E-04  | 4.025262E-04  |
| 11    | H6    | -1.229987E-03 | -1.143177E-04 | 5.090731E-04  |
| 12    | H7    | -2.428545E-03 | -4.860416E-04 | 1.339549E-03  |
| 13    | C9    | -1.523623E-03 | -1.316116E-03 | -8.380505E-03 |
| 14    | O2    | 2.037714E-04  | 5.021861E-04  | 4.287122E-03  |
| 15    | O1    | 1.060869E-03  | 8.803123E-04  | -2.817966E-03 |
| 16    | H13   | 1.269682E-03  | 2.444016E-04  | -8.790796E-06 |
| 17    | O3    | 2.358301E-04  | 1.148286E-03  | -5.546668E-03 |
| 18    | C11   | 2.780406E-03  | 1.300630E-03  | -1.129485E-03 |
| 19    | C13   | 1.197626E-03  | 2.208081E-04  | -4.405831E-05 |
| 20    | C12   | 2.213791E-04  | 1.835657E-03  | 4.441186E-03  |
| 21    | H22   | -1.100601E-03 | -5.034844E-04 | -1.606219E-03 |
| 22    | H23   | -4.905756E-04 | -4.143235E-03 | 1.323903E-03  |
| 23    | H24   | -8.318394E-04 | 2.908243E-04  | 2.800304E-03  |
| 24    | C14   | -3.134318E-04 | 1.828283E-03  | -2.289566E-03 |
| 25    | C15   | -3.626716E-04 | -2.845252E-03 | 5.138697E-04  |
| 26    | C16   | -1.836177E-03 | 3.231368E-03  | -2.805067E-03 |
| 27    | C17   | 7.289717E-04  | 6.994275E-03  | -3.415764E-03 |
| 28    | C18   | 5.346228E-03  | 1.581687E-03  | 2.001457E-03  |
| 29    | H1    | -2.051656E-03 | 1.618205E-03  | -1.824451E-03 |
| 30    | H3    | -1.280703E-03 | -3.636914E-03 | 1.593088E-03  |
| 31    | H4    | 2.390428E-03  | -2.604408E-03 | 3.199456E-03  |
| 32    | H5    | -1.764508E-03 | -5.417366E-03 | 2.421134E-03  |
| 33    | H8    | -1.163933E-03 | -1.136634E-03 | 8.917732E-05  |
| total |       | -1.712983E-03 | -1.750976E-04 | -1.722007E-03 |

end of program der1b

start of program geopt 3

geometry optimization step 3  
reading input hessian of dimension 99  
in five columns format  
reading input hessian of dimension 99  
in five columns format

energy change: -1.4824E-03 . ( 5.0000E-05 )  
gradient maximum: 7.1625E-03 . ( 4.5000E-04 )  
gradient rms: 1.9852E-03 . ( 3.0000E-04 )  
step size: 0.12516 trust radius: 0.30000  
displacement maximum: 6.1507E-02 . ( 1.8000E-03 )  
displacement rms: 1.1150E-02 . ( 1.2000E-03 )  
predicted energy change: -6.0084E-04 geom step: 1.2516E-01  
full step: 1.2516E-01  
molecular structure not yet converged...

center of mass moved by:  
x: -1.7980E-03 y: 6.2855E-03 z: -6.0777E-03

new geometry:

|      | angstroms     |               |               |
|------|---------------|---------------|---------------|
| atom | x             | y             | z             |
| C10  | 0.4549611755  | 0.1651830248  | -1.5210596501 |
| C1   | 0.7819223152  | 0.2810354256  | -0.0809492674 |
| H2   | -1.1657903370 | -0.0511187709 | 0.6958179386  |
| C2   | -0.1377422336 | 0.1387844632  | 0.9373079340  |
| C3   | 2.5152749123  | 0.6241527720  | 1.5884173688  |
| C4   | 0.2324464009  | 0.2178872797  | 2.2780697916  |
| C5   | 2.1170534122  | 0.5440562491  | 0.2674927154  |
| C6   | 1.5656461241  | 0.4527801352  | 2.5796649411  |
| C7   | -0.6852452068 | 0.0559331152  | 3.3864157377  |
| C8   | -0.2476222606 | 0.1245514798  | 4.6410108741  |
| H6   | -1.7237600453 | -0.1266483295 | 3.1772572289  |
| H7   | -0.8822095728 | 0.0066706665  | 5.4942211226  |
| C9   | 1.1666299633  | 0.3685259490  | 4.9295388661  |
| O2   | 1.6447668431  | 0.4371875600  | 6.0096210481  |
| O1   | 1.9844501096  | 0.5255194290  | 3.8602614244  |
| H13  | 3.5397107838  | 0.8130364382  | 1.8368906556  |
| O3   | 3.0672190405  | 0.6806572603  | -0.6688484379 |
| C11  | 1.3718456152  | 0.5231530147  | -2.4051981035 |
| C13  | -0.8827226107 | -0.3472550145 | -1.9472894374 |
| C12  | 2.7106217271  | 1.0549228132  | -1.9847863176 |
| H22  | 1.1852425480  | 0.4460075916  | -3.4610197375 |
| H23  | 2.7400775683  | 2.1423023586  | -2.0616891155 |
| H24  | 3.4913062185  | 0.6623810153  | -2.6175640193 |
| C14  | -3.3590899373 | -1.3092343161 | -2.7866711436 |
| C15  | -1.2830413112 | -1.6439348020 | -1.6244138398 |

|     |               |               |               |
|-----|---------------|---------------|---------------|
| C16 | -1.7400872430 | 0.4596372228  | -2.6927497318 |
| C17 | -2.9718369156 | -0.0192812873 | -3.1097220600 |
| C18 | -2.5107242741 | -2.1216194089 | -2.0412454416 |
| H1  | -0.6246929539 | -2.2808458180 | -1.0642421463 |
| H3  | -1.4453150877 | 1.4673643813  | -2.9349267643 |
| H4  | -3.6268092782 | 0.6188385111  | -3.6740408563 |
| H5  | -2.8011225256 | -3.1296756211 | -1.7919931075 |
| H8  | -4.3150589165 | -1.6834064526 | -3.1036199206 |

nuclear repulsion energy..... 1517.834286134 hartrees

-----  
 / end of geometry optimization iteration 3 /  
 -----

end of program geopt

start of program onee  
 smallest eigenvalue of S: 2.897E-04  
 number of canonical orbitals..... 373  
 end of program onee

start of program probe  
 end of program probe

start of program grid

number of gridpoints:

| atom     | C10 | C1  | H2  | C2  | C3  | C4  | C5  | C6  |
|----------|-----|-----|-----|-----|-----|-----|-----|-----|
| grid # 1 | 92  | 88  | 71  | 86  | 89  | 92  | 87  | 85  |
| grid # 2 | 100 | 96  | 115 | 96  | 97  | 101 | 94  | 95  |
| grid # 3 | 193 | 198 | 209 | 183 | 184 | 199 | 182 | 184 |
| grid # 4 | 340 | 344 | 204 | 327 | 328 | 340 | 310 | 314 |

number of gridpoints:

| atom     | C7  | C8  | H6  | H7  | C9  | O2  | O1  | H13 |
|----------|-----|-----|-----|-----|-----|-----|-----|-----|
| grid # 1 | 85  | 88  | 73  | 73  | 79  | 111 | 108 | 73  |
| grid # 2 | 93  | 95  | 118 | 118 | 89  | 123 | 118 | 118 |
| grid # 3 | 186 | 185 | 218 | 224 | 169 | 270 | 248 | 224 |
| grid # 4 | 326 | 333 | 218 | 224 | 286 | 467 | 443 | 222 |

number of gridpoints:

| atom     | O3  | C11 | C13 | C12 | H22 | H23 | H24 | C14 |
|----------|-----|-----|-----|-----|-----|-----|-----|-----|
| grid # 1 | 110 | 87  | 92  | 78  | 72  | 70  | 70  | 89  |
| grid # 2 | 120 | 94  | 100 | 85  | 114 | 111 | 112 | 97  |
| grid # 3 | 251 | 182 | 196 | 155 | 220 | 222 | 218 | 184 |

grid # 4            443        324        341        283        219        226        219        327

number of gridpoints:

|          |     |     |     |     |     |     |     |     |
|----------|-----|-----|-----|-----|-----|-----|-----|-----|
| atom     | C15 | C16 | C17 | C18 | H1  | H3  | H4  | H5  |
| grid # 1 | 88  | 87  | 89  | 89  | 72  | 72  | 73  | 73  |
| grid # 2 | 96  | 95  | 97  | 96  | 115 | 115 | 118 | 118 |
| grid # 3 | 182 | 182 | 183 | 184 | 219 | 218 | 223 | 223 |
| grid # 4 | 327 | 328 | 328 | 328 | 219 | 218 | 224 | 224 |

number of gridpoints:

|          |     |       |
|----------|-----|-------|
| atom     | H8  | total |
| grid # 1 | 73  | 2764  |
| grid # 2 | 118 | 3467  |
| grid # 3 | 223 | 6721  |
| grid # 4 | 224 | 9828  |

end of program grid

start of program rwr

end of program rwr

start of program scf

|      | i | u | d | i | g |                  | energy  | RMS     | maximum |
|------|---|---|---|---|---|------------------|---------|---------|---------|
|      | t | p | i | c | r |                  | change  | density | DIIS    |
|      | e | d | i | u | i |                  |         | change  | error   |
|      | r | t | s | t | d | total energy     |         |         |         |
| etot | 1 | N | N | 2 | U | -913.22404478262 |         | 1.6E-04 | 7.3E-03 |
| etot | 2 | Y | Y | 6 | M | -913.22905491246 | 5.0E-03 | 7.7E-05 | 2.8E-03 |
| etot | 3 | N | Y | 2 | U | -913.22981957671 | 7.6E-04 | 2.2E-05 | 8.7E-04 |
| etot | 4 | Y | Y | 6 | M | -913.22987368374 | 5.4E-05 | 1.2E-05 | 2.7E-04 |
| etot | 5 | Y | Y | 6 | M | -913.22988767803 | 1.4E-05 | 3.2E-06 | 6.1E-05 |
| etot | 6 | Y | N | 6 | M | -913.22989040707 | 2.7E-06 | 0.0E+00 | 0.0E+00 |

Energy components, in hartrees:

|     |                               |                   |       |
|-----|-------------------------------|-------------------|-------|
| (A) | Nuclear repulsion.....        | 1517.83428613413  |       |
| (E) | Total one-electron terms..... | -4258.17649210294 |       |
| (I) | Total two-electron terms..... | 1827.11231556174  |       |
| (L) | Electronic energy.....        | -2431.06417654120 | (E+I) |
| (N) | Total energy.....             | -913.22989040707  | (A+L) |

SCFE: SCF energy: HF        -913.22989040707 hartrees        iterations:        6

HOMO energy: -0.29025  
LUMO energy: 0.08211

Orbital energies:

|           |           |           |           |           |           |
|-----------|-----------|-----------|-----------|-----------|-----------|
| -20.62903 | -20.60347 | -20.53834 | -11.38042 | -11.32743 | -11.32384 |
| -11.30376 | -11.27765 | -11.26275 | -11.26183 | -11.25556 | -11.25233 |
| -11.25140 | -11.24516 | -11.24475 | -11.24462 | -11.24422 | -11.24369 |
| -11.24318 | -11.24246 | -11.23668 | -1.48720  | -1.43708  | -1.37847  |
| -1.18793  | -1.17042  | -1.12261  | -1.11316  | -1.04568  | -1.03522  |
| -1.02797  | -1.02019  | -0.93999  | -0.89989  | -0.87801  | -0.86580  |
| -0.83898  | -0.83296  | -0.79399  | -0.74615  | -0.72956  | -0.71458  |
| -0.69279  | -0.68793  | -0.67287  | -0.66446  | -0.66200  | -0.64495  |
| -0.63864  | -0.63398  | -0.61839  | -0.61326  | -0.59829  | -0.59487  |
| -0.59003  | -0.58030  | -0.55389  | -0.54257  | -0.52605  | -0.51428  |
| -0.51232  | -0.50909  | -0.50311  | -0.49347  | -0.46699  | -0.44190  |
| -0.44015  | -0.38973  | -0.34946  | -0.34354  | -0.32798  | -0.29025  |
| 0.08211   | 0.10025   | 0.12747   | 0.13205   | 0.16525   | 0.21080   |
| 0.23131   | 0.24216   | 0.24945   | 0.27081   |           |           |

end of program scf

start of program derla  
end of program derla

start of program rwr  
end of program rwr

start of program derlb

forces (hartrees/bohr) : total

| atom | label | x             | y             | z             |
|------|-------|---------------|---------------|---------------|
| 1    | C10   | -2.666313E-03 | -2.943456E-04 | 9.687797E-04  |
| 2    | C1    | -4.620870E-04 | 4.947788E-05  | -8.814762E-04 |
| 3    | H2    | -1.138376E-03 | -1.785953E-04 | -2.456291E-04 |
| 4    | C2    | -4.273610E-04 | -4.360119E-04 | -3.196389E-04 |
| 5    | C3    | -9.767572E-04 | -1.524501E-04 | -2.266979E-03 |
| 6    | C4    | -1.796683E-03 | 1.394018E-05  | -1.796802E-03 |
| 7    | C5    | 1.665287E-03  | 6.523094E-04  | 1.662316E-03  |
| 8    | C6    | 2.162356E-03  | 8.258715E-05  | 1.371011E-03  |
| 9    | C7    | 4.088610E-04  | -1.533405E-04 | -1.748975E-04 |
| 10   | C8    | -1.458798E-04 | 1.389037E-04  | 2.387028E-04  |
| 11   | H6    | -9.994164E-04 | -2.652313E-05 | -3.148777E-04 |
| 12   | H7    | -1.193900E-03 | -1.677799E-04 | 1.360224E-03  |

|       |       |               |               |               |
|-------|-------|---------------|---------------|---------------|
| 13    | C9    | 1.951594E-03  | 1.659052E-04  | 4.881178E-04  |
| 14    | O2    | -1.482063E-03 | -4.112601E-05 | 2.135258E-03  |
| 15    | O1    | 5.756359E-04  | 2.655779E-04  | -3.517902E-03 |
| 16    | H13   | 1.194034E-03  | 1.281880E-04  | 4.554814E-04  |
| 17    | O3    | -7.193379E-05 | -1.073073E-03 | 5.172984E-04  |
| 18    | C11   | 1.686647E-03  | 6.483897E-04  | -4.687102E-04 |
| 19    | C13   | -4.152813E-04 | 1.158247E-03  | -1.575157E-03 |
| 20    | C12   | -2.049245E-03 | 1.619516E-03  | 1.306708E-03  |
| 21    | H22   | -3.071585E-04 | 2.239712E-05  | -7.144054E-04 |
| 22    | H23   | -3.720273E-04 | -4.824299E-04 | 4.044379E-04  |
| 23    | H24   | 1.860155E-03  | -6.027272E-04 | -1.377370E-03 |
| 24    | C14   | 1.188724E-03  | -1.640832E-03 | 2.034265E-03  |
| 25    | C15   | 2.665253E-04  | 2.835830E-03  | -1.809252E-03 |
| 26    | C16   | 3.099667E-03  | -7.005223E-04 | 2.246551E-03  |
| 27    | C17   | -3.808992E-04 | -1.989375E-03 | 1.204024E-03  |
| 28    | C18   | -2.585296E-03 | -9.526530E-05 | -2.210475E-03 |
| 29    | H1    | 1.088499E-03  | -3.530714E-04 | 1.503689E-03  |
| 30    | H3    | 1.038459E-04  | -1.513815E-03 | 5.043781E-04  |
| 31    | H4    | -7.142867E-04 | 2.842055E-05  | -9.426287E-04 |
| 32    | H5    | -3.269897E-04 | 1.828456E-03  | -7.397201E-04 |
| 33    | H8    | -9.519592E-04 | -1.053415E-04 | -6.889627E-04 |
| ----- |       | -----         | -----         | -----         |
|       | total | -2.212080E-03 | -3.684792E-04 | -1.643642E-03 |

end of program der1b

start of program geopt 4

geometry optimization step 4  
reading input hessian of dimension 99  
in five columns format  
reading input hessian of dimension 99  
in five columns format  
reading input hessian of dimension 99  
in five columns format

Level shifts adjusted to satisfy step-size constraints

Step size: 0.3000039

Cos(theta): 0.2593765

Final level shift: -2.7058737E-03

energy change: -3.3037E-04 . ( 5.0000E-05 )  
gradient maximum: 4.7485E-03 . ( 4.5000E-04 )  
gradient rms: 1.1005E-03 . ( 3.0000E-04 )  
step size: 0.29990 trust radius: 0.30000

displacement maximum: 1.3039E-01 . ( 1.8000E-03 )  
displacement rms: 2.6717E-02 . ( 1.2000E-03 )  
predicted energy change: -6.0229E-04 geom step: 2.9990E-01  
full step: 2.9990E-01  
molecular structure not yet converged...

center of mass moved by:  
x: 8.2345E-03 y: -3.0173E-02 z: -9.6053E-03

new geometry:

|      | angstroms     |               |               |
|------|---------------|---------------|---------------|
| atom | x             | y             | z             |
| C10  | 0.4314598755  | 0.2164152238  | -1.5155829466 |
| C1   | 0.7656884389  | 0.3147436896  | -0.0772034677 |
| H2   | -1.2023013887 | 0.0646042050  | 0.7066617209  |
| C2   | -0.1603942795 | 0.2001224609  | 0.9438689988  |
| C3   | 2.5267311018  | 0.5592386806  | 1.5783793026  |
| C4   | 0.2248484840  | 0.2481958558  | 2.2803415001  |
| C5   | 2.1153731190  | 0.5228146033  | 0.2643992456  |
| C6   | 1.5747246655  | 0.4117703008  | 2.5743903440  |
| C7   | -0.6902828589 | 0.1204472790  | 3.3953552486  |
| C8   | -0.2374412064 | 0.1483991536  | 4.6472411463  |
| H6   | -1.7440348143 | -0.0011696227 | 3.1960653515  |
| H7   | -0.8751940127 | 0.0512964961  | 5.5044767268  |
| C9   | 1.1943407296  | 0.3126769521  | 4.9213976650  |
| O2   | 1.6816706669  | 0.3346089773  | 6.0033583023  |
| O1   | 2.0116196033  | 0.4461097876  | 3.8478884788  |
| H13  | 3.5635834153  | 0.6985047966  | 1.8244840649  |
| O3   | 3.0588398519  | 0.6405209333  | -0.6823207913 |
| C11  | 1.3461373038  | 0.5985159981  | -2.3962456061 |
| C13  | -0.8910603470 | -0.3202609187 | -1.9496858847 |
| C12  | 2.6737171414  | 1.1413116573  | -1.9517990690 |
| H22  | 1.1589294851  | 0.5316042550  | -3.4541381963 |
| H23  | 2.6591010916  | 2.2356678657  | -1.9162892739 |
| H24  | 3.4645936942  | 0.8447324287  | -2.6358748218 |
| C14  | -3.3450956261 | -1.3315447002 | -2.7913146425 |
| C15  | -1.3166631325 | -1.5749457331 | -1.5455613765 |
| C16  | -1.7125120226 | 0.4179925144  | -2.7770998228 |
| C17  | -2.9303616331 | -0.0851622596 | -3.2000156790 |
| C18  | -2.5336710517 | -2.0769100120 | -1.9586335144 |
| H1   | -0.6875087243 | -2.1564767527 | -0.9140367667 |
| H3   | -1.3999716498 | 1.3896606594  | -3.0729264868 |
| H4   | -3.5547627269 | 0.4940723173  | -3.8326640360 |
| H5   | -2.8521982896 | -3.0478011785 | -1.6320485399 |
| H8   | -4.2953990957 | -1.7253071704 | -3.1071730584 |

nuclear repulsion energy..... 1519.946723659 hartrees

-----

/ end of geometry optimization iteration 4 /

-----  
end of program geopt

start of program onee

smallest eigenvalue of S: 2.939E-04

number of canonical orbitals..... 373

end of program onee

start of program probe

end of program probe

start of program grid

number of gridpoints:

| atom     | C10 | C1  | H2  | C2  | C3  | C4  | C5  | C6  |
|----------|-----|-----|-----|-----|-----|-----|-----|-----|
| grid # 1 | 92  | 88  | 71  | 86  | 89  | 89  | 82  | 86  |
| grid # 2 | 100 | 98  | 115 | 96  | 97  | 99  | 93  | 95  |
| grid # 3 | 192 | 198 | 209 | 183 | 183 | 198 | 181 | 185 |
| grid # 4 | 340 | 344 | 204 | 327 | 328 | 338 | 316 | 316 |

number of gridpoints:

| atom     | C7  | C8  | H6  | H7  | C9  | O2  | O1  | H13 |
|----------|-----|-----|-----|-----|-----|-----|-----|-----|
| grid # 1 | 86  | 88  | 73  | 73  | 79  | 111 | 108 | 73  |
| grid # 2 | 93  | 95  | 118 | 118 | 89  | 123 | 118 | 118 |
| grid # 3 | 186 | 185 | 218 | 224 | 169 | 270 | 248 | 224 |
| grid # 4 | 326 | 331 | 218 | 224 | 287 | 467 | 443 | 222 |

number of gridpoints:

| atom     | O3  | C11 | C13 | C12 | H22 | H23 | H24 | C14 |
|----------|-----|-----|-----|-----|-----|-----|-----|-----|
| grid # 1 | 111 | 87  | 90  | 77  | 72  | 70  | 70  | 89  |
| grid # 2 | 122 | 94  | 100 | 88  | 114 | 111 | 112 | 97  |
| grid # 3 | 250 | 183 | 194 | 158 | 219 | 222 | 219 | 183 |
| grid # 4 | 442 | 326 | 338 | 284 | 218 | 226 | 222 | 327 |

number of gridpoints:

| atom     | C15 | C16 | C17 | C18 | H1  | H3  | H4  | H5  |
|----------|-----|-----|-----|-----|-----|-----|-----|-----|
| grid # 1 | 86  | 85  | 89  | 89  | 71  | 71  | 73  | 73  |
| grid # 2 | 96  | 95  | 97  | 96  | 115 | 115 | 118 | 118 |
| grid # 3 | 182 | 182 | 183 | 184 | 218 | 216 | 222 | 222 |
| grid # 4 | 325 | 327 | 327 | 327 | 218 | 216 | 224 | 224 |

number of gridpoints:

atom H8 total

```

grid # 1      73    2750
grid # 2     118    3471
grid # 3     222    6712
grid # 4     224    9826

```

end of program grid

```

start of program rwr
end of program rwr

```

start of program scf

|      | i | u | d | i | g |                  | RMS     | maximum |
|------|---|---|---|---|---|------------------|---------|---------|
|      | t | p | i | c | r |                  | density | DIIS    |
|      | e | d | i | u | i | total energy     | change  | error   |
|      | r | t | s | t | d |                  |         |         |
| etot | 1 | N | N | 2 | U | -913.19961700720 |         | 1.3E-02 |
| etot | 2 | Y | Y | 6 | M | -913.22543063497 | 2.6E-02 | 4.9E-03 |
| etot | 3 | N | Y | 2 | U | -913.22907178599 | 3.6E-03 | 1.2E-03 |
| etot | 4 | Y | Y | 6 | M | -913.22930720675 | 2.4E-04 | 3.7E-04 |
| etot | 5 | Y | Y | 6 | M | -913.22933323035 | 2.6E-05 | 1.1E-04 |
| etot | 6 | Y | Y | 6 | M | -913.22933418140 | 9.5E-07 | 4.5E-05 |
| etot | 7 | Y | N | 6 | M | -913.22933513183 | 9.5E-07 | 0.0E+00 |

Energy components, in hartrees:

```

(A) Nuclear repulsion..... 1519.94672365898
(E) Total one-electron terms..... -4262.35559209320
(I) Total two-electron terms..... 1829.17953330238
(L) Electronic energy..... -2433.17605879082 (E+I)
(N) Total energy..... -913.22933513183 (A+L)

```

SCFE: SCF energy: HF -913.22933513183 hartrees iterations: 7

```

HOMO energy: -0.29084
LUMO energy: 0.08099

```

Orbital energies:

```

-20.63163 -20.60347 -20.53907 -11.38240 -11.32919 -11.32294
-11.30487 -11.27900 -11.26462 -11.26156 -11.25346 -11.25336
-11.25182 -11.24722 -11.24364 -11.24139 -11.24044 -11.23983
-11.23938 -11.23862 -11.23803 -1.48884 -1.43635 -1.37784
-1.18888 -1.17355 -1.12325 -1.11341 -1.04419 -1.03730
-1.02864 -1.02232 -0.93880 -0.90072 -0.87781 -0.86565

```

|          |          |          |          |          |          |
|----------|----------|----------|----------|----------|----------|
| -0.84303 | -0.83333 | -0.79313 | -0.74707 | -0.73070 | -0.71658 |
| -0.69450 | -0.68771 | -0.67142 | -0.66473 | -0.66124 | -0.64559 |
| -0.63982 | -0.63496 | -0.61899 | -0.61390 | -0.59836 | -0.59520 |
| -0.59158 | -0.58059 | -0.55290 | -0.54135 | -0.52760 | -0.51619 |
| -0.51310 | -0.50921 | -0.50308 | -0.49453 | -0.46697 | -0.44237 |
| -0.43984 | -0.39207 | -0.34931 | -0.34514 | -0.32784 | -0.29084 |
| 0.08099  | 0.09798  | 0.12833  | 0.13369  | 0.16463  | 0.21127  |
| 0.23405  | 0.24053  | 0.24960  | 0.26900  |          |          |

end of program scf

start of program derla  
end of program derla

start of program rwr  
end of program rwr

start of program derlb

forces (hartrees/bohr) : total

| atom | label | x             | y             | z             |
|------|-------|---------------|---------------|---------------|
| 1    | C10   | 7.491945E-04  | 2.981371E-04  | -1.662035E-03 |
| 2    | C1    | -1.688558E-03 | -1.332012E-04 | 3.918768E-04  |
| 3    | H2    | 2.205587E-03  | -1.281671E-04 | 2.239310E-04  |
| 4    | C2    | 1.129445E-03  | 8.287269E-04  | -3.272710E-03 |
| 5    | C3    | 2.572247E-05  | -1.419147E-04 | 3.003451E-03  |
| 6    | C4    | 1.470001E-03  | 7.194015E-05  | 2.208740E-04  |
| 7    | C5    | -1.304834E-03 | -6.963095E-04 | -8.915723E-04 |
| 8    | C6    | 1.233269E-03  | 6.791833E-04  | -2.779940E-03 |
| 9    | C7    | -2.032858E-03 | -3.090242E-04 | 1.192937E-03  |
| 10   | C8    | 6.480146E-06  | 1.532342E-04  | -8.717990E-04 |
| 11   | H6    | 2.238462E-03  | 1.944633E-04  | -9.182479E-05 |
| 12   | H7    | 1.116635E-03  | 2.727741E-04  | -2.928073E-07 |
| 13   | C9    | 2.516040E-03  | -5.040694E-04 | 8.058809E-03  |
| 14   | O2    | -3.262053E-03 | 2.406118E-04  | -5.078374E-03 |
| 15   | O1    | -1.904064E-03 | -2.101190E-04 | 6.018337E-04  |
| 16   | H13   | -1.678070E-03 | -2.217311E-04 | -1.017336E-04 |
| 17   | O3    | -1.592922E-03 | 1.136675E-03  | -3.404548E-03 |
| 18   | C11   | -4.990388E-04 | 2.983006E-04  | -5.814389E-04 |
| 19   | C13   | 5.079954E-03  | 1.353255E-03  | 2.623008E-03  |
| 20   | C12   | 2.281104E-03  | 1.226016E-03  | -4.575031E-04 |
| 21   | H22   | 5.836412E-04  | -7.122448E-05 | 4.300844E-04  |
| 22   | H23   | 1.062297E-04  | -3.487968E-03 | 7.317103E-04  |

|       |       |               |               |               |
|-------|-------|---------------|---------------|---------------|
| 23    | H24   | -2.626889E-03 | 8.217733E-04  | 2.951678E-03  |
| 24    | C14   | -5.368996E-03 | -4.348754E-03 | -2.080420E-04 |
| 25    | C15   | -2.215190E-03 | -3.111395E-03 | 3.281177E-04  |
| 26    | C16   | -3.418080E-03 | -2.615736E-04 | -1.678627E-03 |
| 27    | C17   | 3.415330E-03  | 2.819110E-04  | 1.957479E-03  |
| 28    | C18   | 8.478666E-04  | -3.756368E-03 | 2.100290E-03  |
| 29    | H1    | 4.426559E-03  | -5.703125E-03 | 5.621484E-03  |
| 30    | H3    | 1.588596E-03  | 9.412692E-03  | -4.033672E-03 |
| 31    | H4    | -5.939692E-03 | 7.438145E-03  | -7.124134E-03 |
| 32    | H5    | 2.683830E-04  | -2.602285E-03 | 7.603190E-04  |
| 33    | H8    | 6.106425E-05  | 7.290735E-04  | -6.176884E-04 |
| ----- |       | -----         | -----         | -----         |
|       | total | -2.181680E-03 | -2.503169E-04 | -1.658052E-03 |

end of program derlb

start of program geopt 5

geometry optimization step 5

reading input hessian of dimension 99

in five columns format

reading input hessian of dimension 99

in five columns format

reading input hessian of dimension 99

in five columns format

\*\* restarting optimization from step 4 \*\*

energy change: 5.5528E-04 . ( 5.0000E-05 )

gradient maximum: 4.7485E-03 . ( 4.5000E-04 )

gradient rms: 1.1005E-03 . ( 3.0000E-04 )

step size: 0.13676 trust radius: 0.30000

displacement maximum: 6.6856E-02 . ( 1.8000E-03 )

displacement rms: 1.2184E-02 . ( 1.2000E-03 )

predicted energy change: -3.3146E-04 geom step: 1.3676E-01

full step: 1.3676E-01

molecular structure not yet converged...

center of mass moved by:

x: 2.2204E-16 y: -8.3267E-17 z: -1.1102E-16

new geometry:

|      | angstroms     |               |               |
|------|---------------|---------------|---------------|
| atom | x             | y             | z             |
| C10  | 0.4463405221  | 0.1824979973  | -1.5233657224 |
| C1   | 0.7777078916  | 0.2835849644  | -0.0839597480 |
| H2   | -1.1814158871 | -0.0084465104 | 0.6922967100  |

|     |               |               |               |
|-----|---------------|---------------|---------------|
| C2  | -0.1466120280 | 0.1558951084  | 0.9337175161  |
| C3  | 2.5257752319  | 0.5717613868  | 1.5810719245  |
| C4  | 0.2302230208  | 0.2235042494  | 2.2730170460  |
| C5  | 2.1217227679  | 0.5120168971  | 0.2637825165  |
| C6  | 1.5729690631  | 0.4212261341  | 2.5734559976  |
| C7  | -0.6866546274 | 0.0838490915  | 3.3859641518  |
| C8  | -0.2458940827 | 0.1455017133  | 4.6400364387  |
| H6  | -1.7316907680 | -0.0734021019 | 3.1802476549  |
| H7  | -0.8848726802 | 0.0453394693  | 5.4964845633  |
| C9  | 1.1755845171  | 0.3586537476  | 4.9230710779  |
| O2  | 1.6460582895  | 0.4324532860  | 6.0053075002  |
| O1  | 1.9975593483  | 0.4860106771  | 3.8502970530  |
| H13 | 3.5578056884  | 0.7314745903  | 1.8306521850  |
| O3  | 3.0710167668  | 0.6303782680  | -0.6760739673 |
| C11 | 1.3652598092  | 0.5507623119  | -2.4050683142 |
| C13 | -0.8835526632 | -0.3401766732 | -1.9515949157 |
| C12 | 2.7011986426  | 1.0750035269  | -1.9683952980 |
| H22 | 1.1791479329  | 0.4826985358  | -3.4633293071 |
| H23 | 2.7199624484  | 2.1661891214  | -1.9875069543 |
| H24 | 3.4835048890  | 0.7227404844  | -2.6276672048 |
| C14 | -3.3533080261 | -1.3303370388 | -2.7868050073 |
| C15 | -1.2764734072 | -1.6336767064 | -1.6208152896 |
| C16 | -1.7453091402 | 0.4501518418  | -2.6982667570 |
| C17 | -2.9731001615 | -0.0428830566 | -3.1154733938 |
| C18 | -2.4996378187 | -2.1258077991 | -2.0391739814 |
| H1  | -0.6185264653 | -2.2562707801 | -1.0354136265 |
| H3  | -1.4572759140 | 1.4561184573  | -2.9464275960 |
| H4  | -3.6293744380 | 0.5828738143  | -3.6975833601 |
| H5  | -2.7859633160 | -3.1297754037 | -1.7828736180 |
| H8  | -4.3058712426 | -1.7123604585 | -3.1096498782 |

nuclear repulsion energy..... 1518.536565699 hartrees

-----  
 / end of geometry optimization iteration 5 /  
 -----

end of program geopt

start of program onee  
 smallest eigenvalue of S: 2.924E-04  
 number of canonical orbitals..... 373  
 end of program onee

start of program probe  
 end of program probe

start of program grid

number of gridpoints:

| atom     | C10 | C1  | H2  | C2  | C3  | C4  | C5  | C6  |
|----------|-----|-----|-----|-----|-----|-----|-----|-----|
| grid # 1 | 92  | 88  | 71  | 86  | 89  | 89  | 84  | 87  |
| grid # 2 | 100 | 98  | 115 | 96  | 97  | 99  | 94  | 95  |
| grid # 3 | 192 | 198 | 209 | 183 | 183 | 199 | 180 | 184 |
| grid # 4 | 340 | 344 | 206 | 327 | 328 | 338 | 315 | 314 |

number of gridpoints:

| atom     | C7  | C8  | H6  | H7  | C9  | O2  | O1  | H13 |
|----------|-----|-----|-----|-----|-----|-----|-----|-----|
| grid # 1 | 86  | 88  | 73  | 73  | 79  | 111 | 108 | 73  |
| grid # 2 | 93  | 95  | 118 | 118 | 89  | 123 | 118 | 118 |
| grid # 3 | 186 | 185 | 219 | 224 | 169 | 270 | 248 | 224 |
| grid # 4 | 326 | 333 | 218 | 224 | 284 | 467 | 443 | 222 |

number of gridpoints:

| atom     | O3  | C11 | C13 | C12 | H22 | H23 | H24 | C14 |
|----------|-----|-----|-----|-----|-----|-----|-----|-----|
| grid # 1 | 111 | 87  | 92  | 77  | 72  | 69  | 70  | 89  |
| grid # 2 | 121 | 94  | 100 | 86  | 114 | 111 | 112 | 97  |
| grid # 3 | 251 | 182 | 195 | 156 | 220 | 222 | 219 | 184 |
| grid # 4 | 443 | 326 | 338 | 282 | 219 | 226 | 219 | 327 |

number of gridpoints:

| atom     | C15 | C16 | C17 | C18 | H1  | H3  | H4  | H5  |
|----------|-----|-----|-----|-----|-----|-----|-----|-----|
| grid # 1 | 88  | 87  | 89  | 89  | 72  | 72  | 73  | 73  |
| grid # 2 | 96  | 95  | 97  | 96  | 115 | 115 | 118 | 118 |
| grid # 3 | 182 | 183 | 183 | 184 | 219 | 218 | 222 | 222 |
| grid # 4 | 325 | 326 | 327 | 327 | 219 | 218 | 224 | 224 |

number of gridpoints:

| atom     | H8  | total |
|----------|-----|-------|
| grid # 1 | 73  | 2760  |
| grid # 2 | 118 | 3469  |
| grid # 3 | 223 | 6718  |
| grid # 4 | 224 | 9823  |

end of program grid

start of program rwr

end of program rwr

start of program scf

i u d i g

|      | t | p | i | c | r |                  |         | RMS     | maximum |
|------|---|---|---|---|---|------------------|---------|---------|---------|
|      | e | d | i | u | i |                  | energy  | density | DIIS    |
|      | r | t | s | t | d | total energy     | change  | change  | error   |
| etot | 1 | N | N | 2 | U | -913.21233515020 |         | 2.7E-04 | 1.0E-02 |
| etot | 2 | Y | Y | 6 | M | -913.22774238271 | 1.5E-02 | 1.4E-04 | 4.1E-03 |
| etot | 3 | N | Y | 2 | U | -913.23001401051 | 2.3E-03 | 4.0E-05 | 1.0E-03 |
| etot | 4 | Y | Y | 6 | M | -913.23013859183 | 1.2E-04 | 1.4E-05 | 2.9E-04 |
| etot | 5 | Y | Y | 6 | M | -913.23016232967 | 2.4E-05 | 5.5E-06 | 8.1E-05 |
| etot | 6 | Y | Y | 6 | M | -913.23016640677 | 4.1E-06 | 2.4E-06 | 3.3E-05 |
| etot | 7 | Y | N | 6 | M | -913.23016760854 | 1.2E-06 | 0.0E+00 | 0.0E+00 |

Energy components, in hartrees:

|     |                               |                   |       |
|-----|-------------------------------|-------------------|-------|
| (A) | Nuclear repulsion.....        | 1518.53656569928  |       |
| (E) | Total one-electron terms..... | -4259.57976711183 |       |
| (I) | Total two-electron terms..... | 1827.81303380401  |       |
| (L) | Electronic energy.....        | -2431.76673330782 | (E+I) |
| (N) | Total energy.....             | -913.23016760854  | (A+L) |

SCFE: SCF energy: HF -913.23016760854 hartrees iterations: 7

HOMO energy: -0.29031  
LUMO energy: 0.08199

Orbital energies:

|           |           |           |           |           |           |
|-----------|-----------|-----------|-----------|-----------|-----------|
| -20.63023 | -20.60336 | -20.53929 | -11.38128 | -11.32815 | -11.32314 |
| -11.30372 | -11.27778 | -11.26350 | -11.26156 | -11.25410 | -11.25260 |
| -11.25228 | -11.24583 | -11.24418 | -11.24391 | -11.24377 | -11.24288 |
| -11.24253 | -11.24157 | -11.23717 | -1.48780  | -1.43679  | -1.38033  |
| -1.18792  | -1.17124  | -1.12250  | -1.11305  | -1.04469  | -1.03605  |
| -1.02682  | -1.02116  | -0.93917  | -0.90011  | -0.87750  | -0.86537  |
| -0.83985  | -0.83251  | -0.79325  | -0.74632  | -0.72950  | -0.71485  |
| -0.69334  | -0.68750  | -0.67172  | -0.66472  | -0.66159  | -0.64444  |
| -0.63870  | -0.63436  | -0.61842  | -0.61344  | -0.59657  | -0.59485  |
| -0.59095  | -0.58039  | -0.55354  | -0.54190  | -0.52693  | -0.51486  |
| -0.51235  | -0.50931  | -0.50257  | -0.49403  | -0.46702  | -0.44201  |
| -0.43962  | -0.39028  | -0.34885  | -0.34462  | -0.32808  | -0.29031  |
| 0.08199   | 0.09971   | 0.12804   | 0.13255   | 0.16512   | 0.21022   |
| 0.23138   | 0.24158   | 0.24975   | 0.26998   |           |           |

end of program scf

start of program derla  
end of program derla

start of program rwr  
end of program rwr

start of program der1b

forces (hartrees/bohr) : total

| atom  | label | x             | y             | z             |
|-------|-------|---------------|---------------|---------------|
| 1     | C10   | 1.414142E-03  | 3.275239E-04  | -9.726409E-04 |
| 2     | C1    | -2.479701E-04 | -3.930093E-05 | -2.250598E-04 |
| 3     | H2    | 5.732971E-04  | 7.043996E-05  | 1.387959E-04  |
| 4     | C2    | 2.384221E-04  | 2.296282E-04  | -9.097495E-04 |
| 5     | C3    | 3.230985E-04  | -6.518223E-05 | 6.420687E-04  |
| 6     | C4    | 5.844896E-04  | -2.862788E-04 | 2.387157E-04  |
| 7     | C5    | -1.564946E-04 | -1.209369E-04 | 2.287316E-04  |
| 8     | C6    | -1.504076E-05 | 4.969720E-04  | -1.285823E-03 |
| 9     | C7    | -1.399861E-03 | -1.660823E-04 | -3.883853E-04 |
| 10    | C8    | -6.155897E-04 | -3.879209E-04 | -5.866838E-05 |
| 11    | H6    | 1.601377E-04  | 1.238554E-04  | -2.294932E-04 |
| 12    | H7    | 7.576192E-04  | 1.636067E-04  | -5.885078E-04 |
| 13    | C9    | -8.829993E-04 | 9.985999E-04  | -1.619869E-04 |
| 14    | O2    | 1.423392E-03  | -2.309374E-04 | 2.142955E-03  |
| 15    | O1    | -5.227083E-04 | -4.774842E-04 | 9.421783E-04  |
| 16    | H13   | -8.818482E-04 | -8.913350E-05 | -1.886268E-04 |
| 17    | O3    | -1.583478E-03 | 1.342431E-05  | -1.984320E-03 |
| 18    | C11   | -1.436093E-03 | -5.053452E-04 | 4.047447E-04  |
| 19    | C13   | 6.668288E-04  | 2.372922E-04  | 7.786719E-04  |
| 20    | C12   | 1.343244E-03  | 1.085327E-03  | 6.572775E-05  |
| 21    | H22   | 2.240779E-04  | 1.213059E-04  | 5.905388E-04  |
| 22    | H23   | -2.708586E-04 | -1.128716E-03 | 6.789586E-04  |
| 23    | H24   | 8.624767E-05  | 3.325819E-04  | 1.343914E-04  |
| 24    | C14   | -1.392776E-03 | -5.038826E-04 | -9.780308E-04 |
| 25    | C15   | 5.980933E-04  | -2.809238E-03 | 1.919015E-03  |
| 26    | C16   | -9.109368E-04 | 1.285189E-03  | -1.556755E-03 |
| 27    | C17   | -6.890534E-04 | 2.771986E-03  | -1.834564E-03 |
| 28    | C18   | 7.853213E-04  | -1.407277E-03 | 1.172041E-03  |
| 29    | H1    | -1.010420E-03 | 8.772933E-04  | -1.444412E-03 |
| 30    | H3    | -2.203526E-05 | 1.386042E-04  | -1.833287E-04 |
| 31    | H4    | 6.240815E-04  | -5.419813E-04 | 9.298293E-04  |
| 32    | H5    | -1.163721E-04 | -6.832204E-04 | 2.226913E-04  |
| 33    | H8    | 1.328590E-04  | -9.018640E-05 | 6.639515E-05  |
| total |       | -2.219183E-03 | -2.594740E-04 | -1.693902E-03 |

end of program der1b

start of program geopt 6

geometry optimization step 6  
reading input hessian of dimension 99  
in five columns format  
reading input hessian of dimension 99  
in five columns format  
reading input hessian of dimension 99  
in five columns format

energy change: -2.7720E-04 . ( 5.0000E-05 )  
gradient maximum: 2.5933E-03 . ( 4.5000E-04 )  
gradient rms: 7.5154E-04 . ( 3.0000E-04 )  
step size: 0.18681 trust radius: 0.30000  
displacement maximum: 1.0195E-01 . ( 1.8000E-03 )  
displacement rms: 1.6643E-02 . ( 1.2000E-03 )  
predicted energy change: -1.9690E-04 geom step: 1.8681E-01  
full step: 1.8681E-01  
molecular structure not yet converged...

center of mass moved by:

x: 1.2355E-03 y: -1.4843E-02 z: -4.8925E-03

new geometry:

|      | angstroms     |               |               |
|------|---------------|---------------|---------------|
| atom | x             | y             | z             |
| C10  | 0.4538053720  | 0.1805697878  | -1.5320012608 |
| C1   | 0.7811438465  | 0.2820346784  | -0.0902589374 |
| H2   | -1.1846856563 | 0.0355186690  | 0.6803148931  |
| C2   | -0.1484452129 | 0.1799673579  | 0.9248357217  |
| C3   | 2.5317107109  | 0.5358999347  | 1.5810175008  |
| C4   | 0.2254600061  | 0.2473173609  | 2.2665303731  |
| C5   | 2.1287353212  | 0.4821172209  | 0.2624080052  |
| C6   | 1.5720787484  | 0.4141263248  | 2.5708509825  |
| C7   | -0.7002277327 | 0.1409238328  | 3.3775602158  |
| C8   | -0.2598357906 | 0.1958053042  | 4.6323737824  |
| H6   | -1.7491068283 | 0.0154973174  | 3.1682665541  |
| H7   | -0.9023946185 | 0.1198695658  | 5.4863484774  |
| C9   | 1.1696823430  | 0.3685690694  | 4.9228558907  |
| O2   | 1.6409593215  | 0.4233293861  | 6.0076014050  |
| O1   | 1.9927477950  | 0.4702928985  | 3.8497644986  |
| H13  | 3.5658188653  | 0.6709849318  | 1.8326124115  |
| O3   | 3.0752974901  | 0.5713839939  | -0.6837557781 |
| C11  | 1.3731086424  | 0.5583226990  | -2.4076817752 |
| C13  | -0.8781266486 | -0.3456623086 | -1.9563580054 |

|     |               |               |               |
|-----|---------------|---------------|---------------|
| C12 | 2.7005853902  | 1.0959333657  | -1.9528098340 |
| H22 | 1.1949589483  | 0.4944288511  | -3.4657247124 |
| H23 | 2.6872814652  | 2.1944126363  | -1.9009624692 |
| H24 | 3.4929275971  | 0.8075822004  | -2.6421293659 |
| C14 | -3.3521745087 | -1.3337717616 | -2.7689404976 |
| C15 | -1.2518695879 | -1.6539751823 | -1.6496010105 |
| C16 | -1.7606035398 | 0.4604717337  | -2.6700295696 |
| C17 | -2.9916842531 | -0.0309009046 | -3.0738462393 |
| C18 | -2.4774495507 | -2.1456819677 | -2.0554683354 |
| H1  | -0.5750891631 | -2.2852796088 | -1.1066762927 |
| H3  | -1.4870953241 | 1.4774951511  | -2.8955352374 |
| H4  | -3.6669165537 | 0.6062291756  | -3.6150585655 |
| H5  | -2.7485862782 | -3.1607121042 | -1.8216045775 |
| H8  | -4.3072822743 | -1.7163407254 | -3.0795024812 |

nuclear repulsion energy..... 1518.005760312 hartrees

-----  
 / end of geometry optimization iteration 6 /  
 -----

end of program geopt

start of program onee  
 smallest eigenvalue of S: 2.938E-04  
 number of canonical orbitals..... 373  
 end of program onee

start of program probe  
 end of program probe

start of program grid

number of gridpoints:

| atom     | C10 | C1  | H2  | C2  | C3  | C4  | C5  | C6  |
|----------|-----|-----|-----|-----|-----|-----|-----|-----|
| grid # 1 | 92  | 88  | 71  | 86  | 89  | 90  | 82  | 87  |
| grid # 2 | 100 | 98  | 115 | 96  | 97  | 101 | 93  | 95  |
| grid # 3 | 192 | 198 | 209 | 183 | 183 | 200 | 181 | 184 |
| grid # 4 | 340 | 345 | 207 | 327 | 328 | 341 | 316 | 312 |

number of gridpoints:

| atom     | C7  | C8  | H6  | H7  | C9  | O2  | O1  | H13 |
|----------|-----|-----|-----|-----|-----|-----|-----|-----|
| grid # 1 | 86  | 88  | 73  | 73  | 79  | 111 | 108 | 73  |
| grid # 2 | 93  | 95  | 118 | 118 | 89  | 123 | 118 | 118 |
| grid # 3 | 186 | 185 | 218 | 224 | 169 | 270 | 248 | 224 |
| grid # 4 | 326 | 333 | 218 | 224 | 286 | 467 | 443 | 222 |

number of gridpoints:

| atom     | O3  | C11 | C13 | C12 | H22 | H23 | H24 | C14 |
|----------|-----|-----|-----|-----|-----|-----|-----|-----|
| grid # 1 | 110 | 87  | 92  | 78  | 72  | 70  | 70  | 89  |
| grid # 2 | 121 | 94  | 100 | 90  | 114 | 112 | 112 | 97  |
| grid # 3 | 250 | 182 | 194 | 159 | 220 | 222 | 219 | 183 |
| grid # 4 | 442 | 324 | 340 | 285 | 219 | 226 | 223 | 327 |

number of gridpoints:

| atom     | C15 | C16 | C17 | C18 | H1  | H3  | H4  | H5  |
|----------|-----|-----|-----|-----|-----|-----|-----|-----|
| grid # 1 | 88  | 87  | 89  | 89  | 72  | 72  | 73  | 73  |
| grid # 2 | 96  | 95  | 97  | 96  | 116 | 115 | 118 | 118 |
| grid # 3 | 181 | 182 | 183 | 184 | 220 | 218 | 223 | 223 |
| grid # 4 | 326 | 328 | 328 | 328 | 220 | 218 | 224 | 224 |

number of gridpoints:

| atom     | H8  | total |
|----------|-----|-------|
| grid # 1 | 73  | 2760  |
| grid # 2 | 118 | 3476  |
| grid # 3 | 223 | 6720  |
| grid # 4 | 224 | 9841  |

end of program grid

start of program rwr

end of program rwr

start of program scf

|      | i | u | d | i | g |                  | RMS     | maximum |
|------|---|---|---|---|---|------------------|---------|---------|
|      | t | p | i | c | r |                  | density | DIIS    |
|      | e | d | i | u | i | energy           | change  | error   |
|      | r | t | s | t | d | total energy     | change  | error   |
| etot | 1 | N | N | 2 | U | -913.22300266890 | 1.8E-04 | 4.6E-03 |
| etot | 2 | Y | Y | 6 | M | -913.22909473653 | 6.1E-03 | 1.9E-03 |
| etot | 3 | N | Y | 2 | U | -913.22994340891 | 8.5E-04 | 4.5E-04 |
| etot | 4 | Y | Y | 6 | M | -913.22999535168 | 5.2E-05 | 1.6E-04 |
| etot | 5 | Y | Y | 6 | M | -913.23000606376 | 1.1E-05 | 6.6E-05 |
| etot | 6 | Y | N | 6 | M | -913.23000817267 | 2.1E-06 | 0.0E+00 |

Energy components, in hartrees:

|     |                               |                   |
|-----|-------------------------------|-------------------|
| (A) | Nuclear repulsion.....        | 1518.00576031219  |
| (E) | Total one-electron terms..... | -4258.55420474497 |
| (I) | Total two-electron terms..... | 1827.31843626012  |

(L) Electronic energy..... -2431.23576848485 (E+I)  
(N) Total energy..... -913.23000817267 (A+L)

SCFE: SCF energy: HF -913.23000817267 hartrees iterations: 6

HOMO energy: -0.29151  
LUMO energy: 0.08178

Orbital energies:

|           |           |           |           |           |           |
|-----------|-----------|-----------|-----------|-----------|-----------|
| -20.63042 | -20.60261 | -20.53978 | -11.38230 | -11.32850 | -11.32225 |
| -11.30608 | -11.27806 | -11.26349 | -11.26146 | -11.25502 | -11.25292 |
| -11.25235 | -11.24621 | -11.24434 | -11.24413 | -11.24357 | -11.24329 |
| -11.24268 | -11.24212 | -11.23764 | -1.48783  | -1.43442  | -1.37975  |
| -1.18710  | -1.17006  | -1.12175  | -1.11222  | -1.04347  | -1.03500  |
| -1.02760  | -1.01991  | -0.93779  | -0.89956  | -0.87714  | -0.86517  |
| -0.83902  | -0.83228  | -0.79242  | -0.74636  | -0.72910  | -0.71498  |
| -0.69337  | -0.68630  | -0.67020  | -0.66466  | -0.66027  | -0.64480  |
| -0.63865  | -0.63335  | -0.61849  | -0.61337  | -0.59813  | -0.59492  |
| -0.58979  | -0.57981  | -0.55266  | -0.54088  | -0.52751  | -0.51412  |
| -0.51144  | -0.50869  | -0.50269  | -0.49359  | -0.46525  | -0.44215  |
| -0.43812  | -0.39061  | -0.34942  | -0.34401  | -0.32777  | -0.29151  |
| 0.08178   | 0.09958   | 0.12738   | 0.13251   | 0.16468   | 0.20837   |
| 0.23175   | 0.24173   | 0.25009   | 0.26980   |           |           |

end of program scf

start of program derla  
end of program derla

start of program rwr  
end of program rwr

start of program derlb

forces (hartrees/bohr) : total

| atom | label | x             | y             | z             |
|------|-------|---------------|---------------|---------------|
| 1    | C10   | -5.331542E-04 | 5.858875E-05  | 1.311585E-03  |
| 2    | C1    | 1.986665E-04  | 6.615780E-05  | -4.287215E-05 |
| 3    | H2    | -1.461025E-04 | -6.597557E-06 | 1.099318E-04  |
| 4    | C2    | 3.205350E-04  | 1.804487E-04  | 4.349896E-04  |
| 5    | C3    | -1.292358E-04 | 6.401816E-05  | -5.597349E-04 |
| 6    | C4    | 2.436353E-04  | -4.994782E-05 | -6.939369E-04 |

|       |       |               |               |               |
|-------|-------|---------------|---------------|---------------|
| 7     | C5    | -9.017545E-04 | -6.934918E-04 | -3.118845E-04 |
| 8     | C6    | -1.484472E-03 | -3.407657E-04 | -8.525669E-04 |
| 9     | C7    | 1.514746E-04  | -4.384608E-05 | -7.132188E-04 |
| 10    | C8    | 1.631725E-03  | 3.560060E-04  | 5.626692E-04  |
| 11    | H6    | 4.188576E-04  | -3.845654E-05 | 3.299320E-05  |
| 12    | H7    | -3.002207E-04 | -1.372742E-05 | 5.006026E-04  |
| 13    | C9    | -2.962335E-03 | -5.472858E-04 | 4.389062E-04  |
| 14    | O2    | -1.960298E-04 | 1.421567E-04  | -1.510804E-03 |
| 15    | O1    | 1.542531E-03  | 3.581227E-04  | 1.128511E-03  |
| 16    | H13   | -1.818036E-04 | 1.243359E-05  | -2.667942E-05 |
| 17    | O3    | 3.771098E-04  | 3.818772E-03  | -6.947140E-03 |
| 18    | C11   | 5.338431E-04  | 1.150299E-03  | -4.572622E-04 |
| 19    | C13   | -2.841650E-04 | 8.724634E-04  | -9.644399E-04 |
| 20    | C12   | 2.543738E-03  | 1.514896E-03  | 1.786195E-03  |
| 21    | H22   | -3.188027E-04 | -1.004927E-05 | -7.419033E-04 |
| 22    | H23   | 1.211813E-04  | -6.800511E-03 | 7.744331E-04  |
| 23    | H24   | -3.234251E-03 | 8.901598E-04  | 4.970725E-03  |
| 24    | C14   | 1.058424E-03  | -3.142325E-04 | 7.967993E-04  |
| 25    | C15   | 1.413175E-04  | 3.008216E-03  | -1.604397E-03 |
| 26    | C16   | 2.710325E-03  | -3.012219E-04 | 1.688822E-03  |
| 27    | C17   | -7.671293E-04 | -2.639081E-03 | 1.011187E-03  |
| 28    | C18   | -2.448302E-03 | 8.778844E-04  | -2.082126E-03 |
| 29    | H1    | 1.393657E-03  | -9.351337E-04 | 1.500838E-03  |
| 30    | H3    | 2.202222E-04  | -1.165505E-03 | 1.711593E-04  |
| 31    | H4    | -7.454439E-04 | 5.857439E-05  | -8.225174E-04 |
| 32    | H5    | -3.997972E-04 | 4.596860E-04  | -2.005726E-04 |
| 33    | H8    | -7.364426E-04 | -2.249937E-04 | -3.681670E-04 |
| ----- |       | -----         | -----         | -----         |
|       | total | -2.162199E-03 | -2.359643E-04 | -1.679875E-03 |

end of program derlb

start of program geopt 7

geometry optimization step 7

[ turning on trust-radius adjustment ]

reading input hessian of dimension 99

in five columns format

reading input hessian of dimension 99

in five columns format

reading input hessian of dimension 99

in five columns format

\*\* restarting optimization from step 6 \*\*

Level shifts adjusted to satisfy step-size constraints

Step size: 0.1509609

Cos(theta): 0.3968794

Final level shift: -2.5200854E-03

energy change: 1.5944E-04 . ( 5.0000E-05 )  
gradient maximum: 2.5933E-03 . ( 4.5000E-04 )  
gradient rms: 7.5154E-04 . ( 3.0000E-04 )  
step size: 0.15095 trust radius: 0.15000  
displacement maximum: 7.5726E-02 . ( 1.8000E-03 )  
displacement rms: 1.3448E-02 . ( 1.2000E-03 )  
predicted energy change: -2.8142E-04 geom step: 1.5095E-01  
full step: 1.5095E-01  
molecular structure not yet converged...

center of mass moved by:

x: 1.1102E-16 y: 2.7756E-17 z: 5.5511E-16

new geometry:

|      | angstroms     |               |               |
|------|---------------|---------------|---------------|
| atom | x             | y             | z             |
| C10  | 0.4443046331  | 0.1865333039  | -1.5332853511 |
| C1   | 0.7746674285  | 0.2822811305  | -0.0924057310 |
| H2   | -1.1847347214 | 0.0366970027  | 0.6887953583  |
| C2   | -0.1467015355 | 0.1765153433  | 0.9266896857  |
| C3   | 2.5319387405  | 0.5271825684  | 1.5786588379  |
| C4   | 0.2334977172  | 0.2355898588  | 2.2697913959  |
| C5   | 2.1204925382  | 0.4849002937  | 0.2602428418  |
| C6   | 1.5802496198  | 0.3982185499  | 2.5728791972  |
| C7   | -0.6891355301 | 0.1288743983  | 3.3833921025  |
| C8   | -0.2443108001 | 0.1741961963  | 4.6395141439  |
| H6   | -1.7385945998 | 0.0139942744  | 3.1719837341  |
| H7   | -0.8819651251 | 0.0989739908  | 5.4979134332  |
| C9   | 1.1852933302  | 0.3369119039  | 4.9327436653  |
| O2   | 1.6670043603  | 0.3741763431  | 6.0174875742  |
| O1   | 2.0064309421  | 0.4405343146  | 3.8533131849  |
| H13  | 3.5661906566  | 0.6620728271  | 1.8254344578  |
| O3   | 3.0590693504  | 0.5973229186  | -0.6909094129 |
| C11  | 1.3634945541  | 0.5708190065  | -2.4080955928 |
| C13  | -0.8827638858 | -0.3462573379 | -1.9617556604 |
| C12  | 2.6907249564  | 1.1029156902  | -1.9505024309 |
| H22  | 1.1858906873  | 0.5135150163  | -3.4675211739 |
| H23  | 2.6838165890  | 2.1858576559  | -1.9022767907 |
| H24  | 3.4870375810  | 0.8116124605  | -2.6187283647 |
| C14  | -3.3551518114 | -1.3508957803 | -2.7854554399 |
| C15  | -1.2743022032 | -1.6382465217 | -1.6167634790 |
| C16  | -1.7451657466 | 0.4334136776  | -2.7224853145 |
| C17  | -2.9757919803 | -0.0652555561 | -3.1307725815 |
| C18  | -2.4991356308 | -2.1380900193 | -2.0291362076 |

|    |               |               |               |
|----|---------------|---------------|---------------|
| H1 | -0.6107502961 | -2.2504649608 | -1.0383217062 |
| H3 | -1.4562426605 | 1.4361831511  | -2.9813447087 |
| H4 | -3.6356647427 | 0.5523437874  | -3.7101430545 |
| H5 | -2.7845685494 | -3.1382152470 | -1.7661538883 |
| H8 | -4.3088197831 | -1.7366604758 | -3.1028245625 |

nuclear repulsion energy..... 1517.708000015 hartrees

-----  
 / end of geometry optimization iteration 7 /  
 -----

end of program geopt

start of program onee  
 smallest eigenvalue of S: 2.925E-04  
 number of canonical orbitals..... 373  
 end of program onee

start of program probe  
 end of program probe

start of program grid

number of gridpoints:

| atom     | C10 | C1  | H2  | C2  | C3  | C4  | C5  | C6  |
|----------|-----|-----|-----|-----|-----|-----|-----|-----|
| grid # 1 | 92  | 88  | 71  | 86  | 89  | 93  | 84  | 87  |
| grid # 2 | 100 | 99  | 115 | 96  | 97  | 101 | 94  | 95  |
| grid # 3 | 192 | 198 | 210 | 182 | 183 | 199 | 180 | 184 |
| grid # 4 | 340 | 347 | 207 | 327 | 328 | 341 | 315 | 310 |

number of gridpoints:

| atom     | C7  | C8  | H6  | H7  | C9  | O2  | O1  | H13 |
|----------|-----|-----|-----|-----|-----|-----|-----|-----|
| grid # 1 | 85  | 88  | 73  | 73  | 79  | 111 | 108 | 73  |
| grid # 2 | 93  | 95  | 118 | 118 | 89  | 123 | 118 | 118 |
| grid # 3 | 186 | 185 | 218 | 224 | 169 | 270 | 248 | 224 |
| grid # 4 | 326 | 333 | 218 | 223 | 284 | 467 | 443 | 222 |

number of gridpoints:

| atom     | O3  | C11 | C13 | C12 | H22 | H23 | H24 | C14 |
|----------|-----|-----|-----|-----|-----|-----|-----|-----|
| grid # 1 | 112 | 87  | 92  | 77  | 72  | 69  | 70  | 89  |
| grid # 2 | 122 | 94  | 100 | 86  | 114 | 111 | 112 | 97  |
| grid # 3 | 251 | 182 | 195 | 155 | 220 | 222 | 218 | 185 |
| grid # 4 | 441 | 326 | 338 | 280 | 219 | 221 | 218 | 327 |

number of gridpoints:

| atom     | C15 | C16 | C17 | C18 | H1  | H3  | H4  | H5  |
|----------|-----|-----|-----|-----|-----|-----|-----|-----|
| grid # 1 | 87  | 87  | 89  | 89  | 72  | 72  | 73  | 73  |
| grid # 2 | 96  | 95  | 97  | 96  | 115 | 115 | 118 | 118 |
| grid # 3 | 183 | 183 | 183 | 184 | 219 | 218 | 222 | 222 |
| grid # 4 | 327 | 328 | 327 | 327 | 219 | 218 | 224 | 224 |

number of gridpoints:

| atom     | H8  | total |
|----------|-----|-------|
| grid # 1 | 73  | 2763  |
| grid # 2 | 118 | 3473  |
| grid # 3 | 223 | 6717  |
| grid # 4 | 224 | 9819  |

end of program grid

start of program rwr  
end of program rwr

start of program scf

|      | i | u | d | i | g |                  | RMS      | maximum |
|------|---|---|---|---|---|------------------|----------|---------|
|      | t | p | i | c | r |                  | density  | DIIS    |
|      | e | d | i | u | i | energy           | change   | error   |
|      | r | t | s | t | d | total energy     | change   |         |
| etot | 1 | N | N | 2 | U | -913.22575406774 |          | 6.1E-03 |
| etot | 2 | Y | Y | 6 | M | -913.22945465321 | 3.7E-03  | 2.5E-03 |
| etot | 3 | Y | Y | 6 | M | -913.23000998476 | 5.6E-04  | 7.0E-04 |
| etot | 4 | N | Y | 2 | U | -913.23003218507 | 2.2E-05  | 2.6E-04 |
| etot | 5 | Y | Y | 6 | M | -913.23004132081 | 9.1E-06  | 5.3E-05 |
| etot | 6 | Y | N | 6 | M | -913.23003934152 | -2.0E-06 | 0.0E+00 |

Energy components, in hartrees:

|     |                               |                   |       |
|-----|-------------------------------|-------------------|-------|
| (A) | Nuclear repulsion.....        | 1517.70800001464  |       |
| (E) | Total one-electron terms..... | -4257.91204962997 |       |
| (I) | Total two-electron terms..... | 1826.97401027381  |       |
| (L) | Electronic energy.....        | -2430.93803935617 | (E+I) |
| (N) | Total energy.....             | -913.23003934152  | (A+L) |

SCFE: SCF energy: HF -913.23003934152 hartrees iterations: 6

HOMO energy: -0.29143  
LUMO energy: 0.08060

Orbital energies:

|           |           |           |           |           |           |
|-----------|-----------|-----------|-----------|-----------|-----------|
| -20.63022 | -20.60190 | -20.54041 | -11.38334 | -11.32875 | -11.32336 |
| -11.30194 | -11.27912 | -11.26381 | -11.26202 | -11.25469 | -11.25321 |
| -11.25266 | -11.24691 | -11.24418 | -11.24404 | -11.24399 | -11.24318 |
| -11.24269 | -11.24197 | -11.23810 | -1.48516  | -1.43925  | -1.37756  |
| -1.18780  | -1.17040  | -1.12190  | -1.11270  | -1.04546  | -1.03609  |
| -1.02643  | -1.02044  | -0.93983  | -0.89926  | -0.87772  | -0.86544  |
| -0.84029  | -0.83268  | -0.79324  | -0.74659  | -0.73002  | -0.71530  |
| -0.69518  | -0.68814  | -0.67188  | -0.66437  | -0.66090  | -0.64541  |
| -0.63864  | -0.63345  | -0.61858  | -0.61444  | -0.59706  | -0.59534  |
| -0.59100  | -0.58074  | -0.55292  | -0.54133  | -0.52720  | -0.51434  |
| -0.51175  | -0.50865  | -0.50244  | -0.49342  | -0.46577  | -0.44255  |
| -0.43892  | -0.39127  | -0.34887  | -0.34455  | -0.32745  | -0.29143  |
| 0.08060   | 0.09919   | 0.12747   | 0.13201   | 0.16410   | 0.20934   |
| 0.23231   | 0.24153   | 0.25110   | 0.26999   |           |           |

end of program scf

start of program derla  
end of program derla

start of program rwr  
end of program rwr

start of program derlb

forces (hartrees/bohr) : total

| atom | label | x             | y             | z             |
|------|-------|---------------|---------------|---------------|
| 1    | C10   | 8.775728E-04  | 2.203975E-04  | -4.600382E-04 |
| 2    | C1    | 7.877551E-04  | 1.532655E-04  | 1.007748E-03  |
| 3    | H2    | -5.102343E-04 | -1.775211E-04 | 6.748722E-05  |
| 4    | C2    | -1.299756E-03 | -1.386728E-05 | 3.883996E-03  |
| 5    | C3    | 4.060361E-04  | 3.258048E-04  | -2.839897E-03 |
| 6    | C4    | -1.021020E-03 | 1.161272E-04  | -1.228206E-03 |
| 7    | C5    | 6.558473E-04  | 5.187498E-04  | -5.666126E-04 |
| 8    | C6    | -1.970557E-03 | -9.631107E-04 | 1.516119E-03  |
| 9    | C7    | 1.525280E-03  | 2.116777E-04  | 7.096074E-04  |
| 10   | C8    | 5.667107E-04  | 7.933528E-04  | 9.452863E-04  |
| 11   | H6    | 1.593762E-04  | -3.196216E-04 | 8.133533E-04  |
| 12   | H7    | -9.243570E-04 | -1.033934E-04 | -3.465064E-04 |
| 13   | C9    | 2.300048E-03  | -1.616104E-03 | 1.973961E-03  |
| 14   | O2    | -4.376368E-03 | 4.420721E-04  | -8.489506E-03 |
| 15   | O1    | 1.647555E-05  | 7.327201E-04  | 6.855078E-04  |

|       |       |               |               |               |
|-------|-------|---------------|---------------|---------------|
| 16    | H13   | 6.501872E-04  | 1.710700E-04  | -2.142074E-04 |
| 17    | O3    | 4.112429E-03  | -3.059154E-03 | 5.958110E-03  |
| 18    | C11   | -6.821085E-04 | -4.596212E-05 | -1.228071E-03 |
| 19    | C13   | -6.258517E-04 | 2.289562E-05  | -4.534701E-04 |
| 20    | C12   | -2.155210E-03 | -9.297570E-04 | -1.025282E-03 |
| 21    | H22   | -3.741566E-04 | -3.178648E-04 | -1.338225E-05 |
| 22    | H23   | -8.121423E-04 | 4.472471E-03  | -4.437661E-04 |
| 23    | H24   | 9.672208E-05  | -8.805470E-04 | -1.758613E-03 |
| 24    | C14   | -7.805091E-05 | 5.765098E-04  | -5.122047E-04 |
| 25    | C15   | -2.647353E-03 | 4.816135E-04  | -2.039473E-03 |
| 26    | C16   | -1.644610E-03 | -2.421962E-04 | -2.248372E-04 |
| 27    | C17   | 2.156922E-03  | -3.510845E-05 | 1.079339E-03  |
| 28    | C18   | 2.172196E-03  | 1.978517E-03  | -4.329662E-06 |
| 29    | H1    | 1.094998E-03  | -2.015654E-03 | 1.790305E-03  |
| 30    | H3    | -3.323005E-04 | 3.464601E-04  | -3.671390E-04 |
| 31    | H4    | -7.830757E-04 | 1.137275E-03  | -1.127084E-03 |
| 32    | H5    | -1.890017E-04 | -2.221591E-03 | 9.150814E-04  |
| 33    | H8    | 5.913895E-04  | 5.206792E-05  | 3.324581E-04  |
| ----- |       | -----         | -----         | -----         |
|       | total | -2.256208E-03 | -1.884043E-04 | -1.664266E-03 |

end of program der1b

start of program geopt 8

geometry optimization step 8  
 reading input hessian of dimension 99  
 in five columns format  
 reading input hessian of dimension 99  
 in five columns format  
 reading input hessian of dimension 99  
 in five columns format  
 \*\* restarting optimization from step 6 \*\*

Level shifts adjusted to satisfy step-size constraints

Step size: 0.0750340  
 Cos(theta): 0.4739450

Final level shift: -1.0338524E-02

energy change: 1.2827E-04 . ( 5.0000E-05 )  
 gradient maximum: 2.5933E-03 . ( 4.5000E-04 )  
 gradient rms: 7.5154E-04 . ( 3.0000E-04 )  
 step size: 0.07503 trust radius: 0.07500  
 displacement maximum: 3.8284E-02 . ( 1.8000E-03 )  
 displacement rms: 6.6845E-03 . ( 1.2000E-03 )

predicted energy change: -1.7910E-04 geom step: 7.5033E-02  
full step: 7.5033E-02  
molecular structure not yet converged...

center of mass moved by:  
x: 1.1102E-16 y: 2.7756E-17 z: -4.4409E-16

new geometry:

|      | angstroms     |               |               |
|------|---------------|---------------|---------------|
| atom | x             | y             | z             |
| C10  | 0.4503379428  | 0.1781520551  | -1.5302998417 |
| C1   | 0.7798176575  | 0.2776421129  | -0.0895482118 |
| H2   | -1.1792922579 | 0.0060402957  | 0.6868905186  |
| C2   | -0.1441229843 | 0.1611888192  | 0.9279617277  |
| C3   | 2.5286446926  | 0.5504674212  | 1.5809893064  |
| C4   | 0.2309848892  | 0.2281798828  | 2.2698363401  |
| C5   | 2.1237738100  | 0.4956493130  | 0.2617955258  |
| C6   | 1.5744377153  | 0.4118436160  | 2.5729684348  |
| C7   | -0.6916526835 | 0.1062331672  | 3.3812975505  |
| C8   | -0.2511887674 | 0.1647497985  | 4.6365661394  |
| H6   | -1.7378456903 | -0.0332833171 | 3.1713733544  |
| H7   | -0.8903112620 | 0.0783324872  | 5.4923380748  |
| C9   | 1.1736123652  | 0.3570278803  | 4.9272392070  |
| O2   | 1.6491478337  | 0.4160828288  | 6.0104575617  |
| O1   | 1.9963359108  | 0.4701775471  | 3.8527956168  |
| H13  | 3.5604286747  | 0.7010371479  | 1.8304442079  |
| O3   | 3.0698389634  | 0.6110605727  | -0.6822489444 |
| C11  | 1.3680770107  | 0.5549894606  | -2.4083742576 |
| C13  | -0.8810918912 | -0.3469592077 | -1.9563520098 |
| C12  | 2.7003515905  | 1.0851572080  | -1.9628183455 |
| H22  | 1.1865359958  | 0.4919786497  | -3.4664936780 |
| H23  | 2.7039289602  | 2.1761770892  | -1.9488456478 |
| H24  | 3.4900594594  | 0.7625734677  | -2.6303374319 |
| C14  | -3.3548001154 | -1.3365509949 | -2.7811398231 |
| C15  | -1.2691518664 | -1.6451111187 | -1.6294650542 |
| C16  | -1.7488346729 | 0.4475145963  | -2.6969233009 |
| C17  | -2.9796851085 | -0.0444619315 | -3.1066822480 |
| C18  | -2.4946913432 | -2.1372970337 | -2.0418649123 |
| H1   | -0.6034034578 | -2.2689720426 | -1.0635959269 |
| H3   | -1.4636409792 | 1.4559028884  | -2.9400616681 |
| H4   | -3.6433908740 | 0.5842102193  | -3.6705579201 |
| H5   | -2.7773996005 | -3.1438632854 | -1.7905639497 |
| H8   | -4.3095057686 | -1.7183202142 | -3.0968220920 |

nuclear repulsion energy..... 1517.922517147 hartrees

-----  
/ end of geometry optimization iteration 8 /  
-----

end of program geopt

start of program onee

smallest eigenvalue of S: 2.922E-04

number of canonical orbitals..... 373

end of program onee

start of program probe

end of program probe

start of program grid

number of gridpoints:

| atom     | C10 | C1  | H2  | C2  | C3  | C4  | C5  | C6  |
|----------|-----|-----|-----|-----|-----|-----|-----|-----|
| grid # 1 | 92  | 88  | 71  | 86  | 89  | 91  | 84  | 87  |
| grid # 2 | 100 | 98  | 115 | 96  | 97  | 101 | 94  | 95  |
| grid # 3 | 192 | 198 | 209 | 182 | 183 | 199 | 180 | 184 |
| grid # 4 | 340 | 345 | 206 | 327 | 328 | 342 | 316 | 314 |

number of gridpoints:

| atom     | C7  | C8  | H6  | H7  | C9  | O2  | O1  | H13 |
|----------|-----|-----|-----|-----|-----|-----|-----|-----|
| grid # 1 | 85  | 88  | 73  | 73  | 79  | 111 | 108 | 73  |
| grid # 2 | 93  | 95  | 118 | 118 | 89  | 123 | 118 | 118 |
| grid # 3 | 186 | 185 | 218 | 224 | 169 | 270 | 248 | 224 |
| grid # 4 | 326 | 333 | 218 | 224 | 284 | 467 | 443 | 222 |

number of gridpoints:

| atom     | O3  | C11 | C13 | C12 | H22 | H23 | H24 | C14 |
|----------|-----|-----|-----|-----|-----|-----|-----|-----|
| grid # 1 | 112 | 87  | 92  | 77  | 72  | 69  | 70  | 89  |
| grid # 2 | 122 | 94  | 100 | 86  | 114 | 111 | 112 | 97  |
| grid # 3 | 251 | 182 | 194 | 156 | 220 | 222 | 219 | 184 |
| grid # 4 | 441 | 324 | 340 | 282 | 219 | 226 | 220 | 327 |

number of gridpoints:

| atom     | C15 | C16 | C17 | C18 | H1  | H3  | H4  | H5  |
|----------|-----|-----|-----|-----|-----|-----|-----|-----|
| grid # 1 | 88  | 87  | 89  | 89  | 72  | 72  | 73  | 73  |
| grid # 2 | 96  | 95  | 97  | 96  | 115 | 115 | 118 | 118 |
| grid # 3 | 182 | 183 | 183 | 184 | 219 | 218 | 222 | 222 |
| grid # 4 | 327 | 328 | 327 | 327 | 219 | 218 | 224 | 224 |

number of gridpoints:

| atom     | H8  | total |
|----------|-----|-------|
| grid # 1 | 73  | 2762  |
| grid # 2 | 118 | 3472  |

grid # 3        224    6716  
grid # 4        224    9832

end of program grid

start of program rwr  
end of program rwr

start of program scf

|      | i | u | d | i | g |                  | RMS     | maximum |
|------|---|---|---|---|---|------------------|---------|---------|
|      | t | p | i | c | r |                  | density | DIIS    |
|      | e | d | i | u | i | energy           | change  | error   |
|      | r | t | s | t | d | total energy     | change  |         |
| etot | 1 | N | N | 2 | U | -913.22799575569 |         | 2.7E-03 |
| etot | 2 | Y | Y | 6 | M | -913.22997072783 | 2.0E-03 | 1.0E-03 |
| etot | 3 | Y | Y | 6 | M | -913.23023141548 | 2.6E-04 | 2.6E-04 |
| etot | 4 | N | Y | 2 | U | -913.23025919149 | 2.8E-05 | 1.1E-04 |
| etot | 5 | Y | Y | 6 | M | -913.23026115701 | 2.0E-06 | 4.4E-05 |
| etot | 6 | Y | N | 6 | M | -913.23026267373 | 1.5E-06 | 0.0E+00 |

Energy components, in hartrees:

|     |                               |                   |       |
|-----|-------------------------------|-------------------|-------|
| (A) | Nuclear repulsion.....        | 1517.92251714721  |       |
| (E) | Total one-electron terms..... | -4258.35855683780 |       |
| (I) | Total two-electron terms..... | 1827.20577701686  |       |
| (L) | Electronic energy.....        | -2431.15277982094 | (E+I) |
| (N) | Total energy.....             | -913.23026267373  | (A+L) |

SCFE: SCF energy: HF        -913.23026267373 hartrees        iterations:        6

HOMO energy:        -0.29102  
LUMO energy:        0.08146

Orbital energies:

|           |           |           |           |           |           |
|-----------|-----------|-----------|-----------|-----------|-----------|
| -20.62984 | -20.60275 | -20.53980 | -11.38209 | -11.32819 | -11.32323 |
| -11.30384 | -11.27828 | -11.26342 | -11.26187 | -11.25482 | -11.25255 |
| -11.25253 | -11.24618 | -11.24422 | -11.24411 | -11.24410 | -11.24321 |
| -11.24276 | -11.24200 | -11.23749 | -1.48658  | -1.43677  | -1.37900  |
| -1.18765  | -1.17048  | -1.12215  | -1.11269  | -1.04476  | -1.03560  |
| -1.02707  | -1.02048  | -0.93914  | -0.89954  | -0.87763  | -0.86539  |
| -0.83970  | -0.83263  | -0.79317  | -0.74625  | -0.72958  | -0.71500  |
| -0.69378  | -0.68750  | -0.67148  | -0.66450  | -0.66111  | -0.64500  |
| -0.63860  | -0.63372  | -0.61851  | -0.61372  | -0.59749  | -0.59497  |

|          |          |          |          |          |          |
|----------|----------|----------|----------|----------|----------|
| -0.59052 | -0.58032 | -0.55315 | -0.54164 | -0.52705 | -0.51441 |
| -0.51189 | -0.50889 | -0.50270 | -0.49357 | -0.46622 | -0.44228 |
| -0.43921 | -0.39060 | -0.34902 | -0.34434 | -0.32775 | -0.29102 |
| 0.08146  | 0.09962  | 0.12760  | 0.13222  | 0.16468  | 0.20956  |
| 0.23185  | 0.24173  | 0.25013  | 0.27013  |          |          |

end of program scf

start of program derla  
end of program derla

start of program rwr  
end of program rwr

start of program derlb

forces (hartrees/bohr) : total

| atom | label | x             | y             | z             |
|------|-------|---------------|---------------|---------------|
| 1    | C10   | -3.311045E-04 | 1.283840E-05  | 3.067989E-04  |
| 2    | C1    | 3.361741E-04  | 7.433416E-05  | 1.478857E-04  |
| 3    | H2    | -3.624497E-04 | -6.336365E-05 | -1.887175E-05 |
| 4    | C2    | -5.382842E-04 | -4.243262E-06 | 1.343538E-03  |
| 5    | C3    | -1.303153E-04 | 1.001366E-04  | -1.523019E-03 |
| 6    | C4    | -6.659826E-04 | -1.363202E-04 | -9.740373E-04 |
| 7    | C5    | 6.639483E-04  | 3.842599E-04  | 1.859943E-04  |
| 8    | C6    | -6.157734E-04 | -1.856755E-04 | 4.690567E-04  |
| 9    | C7    | 6.352749E-04  | 6.773366E-05  | -2.158022E-04 |
| 10   | C8    | 4.530268E-04  | 4.174016E-04  | 6.627988E-04  |
| 11   | H6    | -1.924550E-04 | -1.262823E-04 | 1.559457E-04  |
| 12   | H7    | -5.945872E-04 | -5.610773E-05 | 1.533878E-04  |
| 13   | C9    | 4.232423E-04  | -6.102459E-04 | 2.724198E-04  |
| 14   | O2    | -1.535827E-03 | 1.081825E-04  | -2.185200E-03 |
| 15   | O1    | 4.563936E-04  | 2.857867E-04  | -2.275825E-05 |
| 16   | H13   | 3.500005E-04  | 7.329269E-05  | -2.333917E-05 |
| 17   | O3    | 6.038551E-04  | -6.267393E-04 | -2.847977E-04 |
| 18   | C11   | 2.309818E-04  | 2.886081E-05  | -3.618900E-04 |
| 19   | C13   | -1.021099E-04 | 3.516615E-04  | -5.913027E-04 |
| 20   | C12   | 1.462073E-04  | 8.657382E-04  | 5.462955E-04  |
| 21   | H22   | -2.591579E-04 | -6.594807E-05 | -2.823553E-04 |
| 22   | H23   | -2.859397E-04 | -7.650329E-04 | 4.650469E-05  |
| 23   | H24   | -8.865813E-04 | 1.771787E-04  | 8.067025E-04  |
| 24   | C14   | 1.345456E-04  | -2.328025E-04 | 2.246862E-04  |
| 25   | C15   | -9.274053E-04 | 1.019490E-03  | -1.314674E-03 |

|       |       |               |               |               |
|-------|-------|---------------|---------------|---------------|
| 26    | C16   | 2.588785E-04  | -2.192506E-04 | 4.395792E-04  |
| 27    | C17   | 6.765923E-04  | -6.520372E-04 | 8.199880E-04  |
| 28    | C18   | 2.721066E-05  | 5.449071E-04  | -4.789037E-04 |
| 29    | H1    | 8.636674E-04  | -1.048637E-03 | 1.151666E-03  |
| 30    | H3    | -4.366449E-05 | -1.647855E-04 | -1.395363E-04 |
| 31    | H4    | -7.387286E-04 | 6.497360E-04  | -9.470882E-04 |
| 32    | H5    | -1.666825E-04 | -4.006759E-04 | 1.115550E-04  |
| 33    | H8    | -1.136084E-04 | -6.533279E-05 | -1.118006E-04 |
| ----- |       |               |               |               |
|       | total | -2.230658E-03 | -2.619420E-04 | -1.630573E-03 |

end of program derlb

start of program geopt 9

geometry optimization step 9

reading input hessian of dimension 99  
in five columns format  
reading input hessian of dimension 99  
in five columns format  
reading input hessian of dimension 99  
in five columns format

Level shifts adjusted to satisfy step-size constraints

Step size: 0.0375401  
Cos(theta): 0.6035706

Final level shift: -2.8247406E-02

energy change: -9.5065E-05 . ( 5.0000E-05 )  
gradient maximum: 2.5306E-03 . ( 4.5000E-04 )  
gradient rms: 5.1707E-04 . ( 3.0000E-04 )  
step size: 0.03754 trust radius: 0.03750  
displacement maximum: 1.4429E-02 . ( 1.8000E-03 )  
displacement rms: 3.3443E-03 . ( 1.2000E-03 )  
predicted energy change: -8.5659E-05 geom step: 3.7540E-02  
full step: 3.7540E-02  
molecular structure not yet converged...

center of mass moved by:

x: 1.1329E-03 y: -2.3793E-03 z: -1.3266E-03

new geometry:

|      | angstroms    |              |               |
|------|--------------|--------------|---------------|
| atom | x            | y            | z             |
| C10  | 0.4443151029 | 0.1848533742 | -1.5259533501 |

|     |               |               |               |
|-----|---------------|---------------|---------------|
| C1  | 0.7768331141  | 0.2782358730  | -0.0857294024 |
| H2  | -1.1853127926 | 0.0154373662  | 0.6925491226  |
| C2  | -0.1481230985 | 0.1637605310  | 0.9322710879  |
| C3  | 2.5313554034  | 0.5392043649  | 1.5784401453  |
| C4  | 0.2310981249  | 0.2272189063  | 2.2713935063  |
| C5  | 2.1238162693  | 0.4894289834  | 0.2623993951  |
| C6  | 1.5771336046  | 0.4039522125  | 2.5717374619  |
| C7  | -0.6890216900 | 0.1106893128  | 3.3852072559  |
| C8  | -0.2466893919 | 0.1710632621  | 4.6394371482  |
| H6  | -1.7370084137 | -0.0248480001 | 3.1794634482  |
| H7  | -0.8865549982 | 0.0894645634  | 5.4963673121  |
| C9  | 1.1790704916  | 0.3567868795  | 4.9234694171  |
| O2  | 1.6520174747  | 0.4211537870  | 6.0062291505  |
| O1  | 2.0028001781  | 0.4625263206  | 3.8494174080  |
| H13 | 3.5651710455  | 0.6841600909  | 1.8266183273  |
| O3  | 3.0683276199  | 0.6015859715  | -0.6828231432 |
| C11 | 1.3616327993  | 0.5650230010  | -2.4037323995 |
| C13 | -0.8836666457 | -0.3427497846 | -1.9562917256 |
| C12 | 2.6937773223  | 1.0919691058  | -1.9547158769 |
| H22 | 1.1778105283  | 0.5062948198  | -3.4622788445 |
| H23 | 2.6969686690  | 2.1812843571  | -1.9280395888 |
| H24 | 3.4807586060  | 0.7778294784  | -2.6270211224 |
| C14 | -3.3527817956 | -1.3401982150 | -2.7871184675 |
| C15 | -1.2720975972 | -1.6390208203 | -1.6257115683 |
| C16 | -1.7486661038 | 0.4458961116  | -2.7027356971 |
| C17 | -2.9769943749 | -0.0498326708 | -3.1165793817 |
| C18 | -2.4950248926 | -2.1352388353 | -2.0415713533 |
| H1  | -0.6099832340 | -2.2589402241 | -1.0446963341 |
| H3  | -1.4628251901 | 1.4521693425  | -2.9505863834 |
| H4  | -3.6375023184 | 0.5744644529  | -3.6938073861 |
| H5  | -2.7787346020 | -3.1400937141 | -1.7851602377 |
| H8  | -4.3053794109 | -1.7244317597 | -3.1073232256 |

nuclear repulsion energy..... 1518.412061634 hartrees

-----  
 / end of geometry optimization iteration 9 /  
 -----

end of program geopt

start of program onee

smallest eigenvalue of S: 2.926E-04

number of canonical orbitals..... 373

end of program onee

start of program probe

end of program probe

start of program grid

number of gridpoints:

| atom     | C10 | C1  | H2  | C2  | C3  | C4  | C5  | C6  |
|----------|-----|-----|-----|-----|-----|-----|-----|-----|
| grid # 1 | 92  | 88  | 71  | 86  | 89  | 89  | 82  | 87  |
| grid # 2 | 100 | 98  | 115 | 96  | 97  | 99  | 93  | 95  |
| grid # 3 | 192 | 198 | 209 | 183 | 183 | 199 | 181 | 184 |
| grid # 4 | 340 | 345 | 207 | 327 | 328 | 340 | 315 | 314 |

number of gridpoints:

| atom     | C7  | C8  | H6  | H7  | C9  | O2  | O1  | H13 |
|----------|-----|-----|-----|-----|-----|-----|-----|-----|
| grid # 1 | 85  | 88  | 73  | 73  | 79  | 111 | 108 | 73  |
| grid # 2 | 93  | 95  | 118 | 118 | 89  | 123 | 118 | 118 |
| grid # 3 | 186 | 185 | 219 | 224 | 169 | 270 | 248 | 224 |
| grid # 4 | 326 | 333 | 218 | 224 | 284 | 467 | 443 | 222 |

number of gridpoints:

| atom     | O3  | C11 | C13 | C12 | H22 | H23 | H24 | C14 |
|----------|-----|-----|-----|-----|-----|-----|-----|-----|
| grid # 1 | 112 | 87  | 91  | 77  | 72  | 69  | 70  | 89  |
| grid # 2 | 122 | 94  | 100 | 86  | 114 | 111 | 112 | 97  |
| grid # 3 | 250 | 182 | 194 | 156 | 220 | 222 | 219 | 184 |
| grid # 4 | 441 | 326 | 338 | 282 | 219 | 224 | 219 | 327 |

number of gridpoints:

| atom     | C15 | C16 | C17 | C18 | H1  | H3  | H4  | H5  |
|----------|-----|-----|-----|-----|-----|-----|-----|-----|
| grid # 1 | 88  | 87  | 89  | 89  | 72  | 72  | 73  | 73  |
| grid # 2 | 96  | 95  | 97  | 96  | 115 | 115 | 118 | 118 |
| grid # 3 | 182 | 183 | 183 | 184 | 219 | 218 | 222 | 222 |
| grid # 4 | 325 | 327 | 327 | 327 | 219 | 218 | 224 | 224 |

number of gridpoints:

| atom     | H8  | total |
|----------|-----|-------|
| grid # 1 | 73  | 2757  |
| grid # 2 | 118 | 3469  |
| grid # 3 | 223 | 6717  |
| grid # 4 | 224 | 9824  |

end of program grid

start of program rwr

end of program rwr

start of program scf

|      | i | u | d | i | g |                  |         | RMS     | maximum |
|------|---|---|---|---|---|------------------|---------|---------|---------|
|      | t | p | i | c | r |                  | energy  | density | DIIS    |
|      | e | d | i | u | i |                  | change  | change  | error   |
|      | r | t | s | t | d | total energy     |         |         |         |
| etot | 1 | N | N | 1 | U | -913.22984389360 |         | 6.1E-05 | 1.1E-03 |
| etot | 2 | Y | Y | 4 | M | -913.23015481245 | 3.1E-04 | 2.0E-05 | 3.9E-04 |
| etot | 3 | Y | Y | 4 | M | -913.23019643134 | 4.2E-05 | 5.5E-06 | 1.2E-04 |
| etot | 4 | Y | Y | 4 | M | -913.23019952004 | 3.1E-06 | 2.7E-06 | 4.5E-05 |
| etot | 5 | Y | N | 4 | M | -913.23020226313 | 2.7E-06 | 0.0E+00 | 0.0E+00 |

Energy components, in hartrees:

|     |                               |                   |       |
|-----|-------------------------------|-------------------|-------|
| (A) | Nuclear repulsion.....        | 1518.41206163446  |       |
| (E) | Total one-electron terms..... | -4259.33564208577 |       |
| (I) | Total two-electron terms..... | 1827.69337818817  |       |
| (L) | Electronic energy.....        | -2431.64226389759 | (E+I) |
| (N) | Total energy.....             | -913.23020226313  | (A+L) |

SCFE: SCF energy: HF -913.23020226313 hartrees iterations: 5

HOMO energy: -0.29083  
LUMO energy: 0.08167

Orbital energies:

|           |           |           |           |           |           |
|-----------|-----------|-----------|-----------|-----------|-----------|
| -20.63035 | -20.60280 | -20.53950 | -11.38171 | -11.32840 | -11.32280 |
| -11.30312 | -11.27810 | -11.26355 | -11.26155 | -11.25437 | -11.25267 |
| -11.25264 | -11.24610 | -11.24398 | -11.24388 | -11.24379 | -11.24300 |
| -11.24263 | -11.24176 | -11.23747 | -1.48739  | -1.43743  | -1.37987  |
| -1.18779  | -1.17075  | -1.12220  | -1.11291  | -1.04448  | -1.03602  |
| -1.02656  | -1.02087  | -0.93906  | -0.89989  | -0.87751  | -0.86539  |
| -0.83975  | -0.83243  | -0.79293  | -0.74658  | -0.72960  | -0.71499  |
| -0.69419  | -0.68744  | -0.67149  | -0.66466  | -0.66129  | -0.64474  |
| -0.63877  | -0.63376  | -0.61855  | -0.61364  | -0.59674  | -0.59508  |
| -0.59085  | -0.58041  | -0.55328  | -0.54144  | -0.52729  | -0.51462  |
| -0.51196  | -0.50903  | -0.50233  | -0.49393  | -0.46630  | -0.44216  |
| -0.43912  | -0.39076  | -0.34879  | -0.34453  | -0.32788  | -0.29083  |
| 0.08167   | 0.09949   | 0.12773   | 0.13247   | 0.16485   | 0.20979   |
| 0.23170   | 0.24163   | 0.25046   | 0.26998   |           |           |

end of program scf

start of program derla  
end of program derla

start of program rwr  
end of program rwr

start of program der1b

forces (hartrees/bohr) : total

| atom  | label | x             | y             | z             |
|-------|-------|---------------|---------------|---------------|
| 1     | C10   | 7.893627E-04  | 1.738318E-05  | -4.795691E-04 |
| 2     | C1    | -9.891981E-05 | 9.514207E-05  | -1.785597E-04 |
| 3     | H2    | 2.170261E-04  | -7.708063E-05 | -1.733574E-05 |
| 4     | C2    | 2.151263E-04  | 1.966231E-04  | -4.628615E-04 |
| 5     | C3    | 1.136705E-04  | 8.570018E-05  | 8.819887E-04  |
| 6     | C4    | 4.996209E-04  | -8.296247E-05 | 6.973481E-04  |
| 7     | C5    | -8.620994E-04 | -2.136050E-04 | -6.626503E-04 |
| 8     | C6    | -5.696045E-04 | 1.252785E-04  | -6.592924E-04 |
| 9     | C7    | -5.007362E-04 | 7.887170E-05  | -3.755862E-05 |
| 10    | C8    | -3.149054E-04 | -1.435025E-04 | -3.457814E-04 |
| 11    | H6    | 1.443198E-04  | -5.685646E-05 | -1.144567E-04 |
| 12    | H7    | 2.677368E-04  | 5.445897E-05  | -2.936210E-04 |
| 13    | C9    | -4.127734E-04 | 1.868205E-04  | 3.418795E-04  |
| 14    | O2    | 4.001292E-04  | -2.108708E-05 | 1.965969E-04  |
| 15    | O1    | -3.844603E-04 | -1.406104E-04 | 5.832355E-04  |
| 16    | H13   | -3.615840E-04 | 1.905670E-05  | -7.514200E-05 |
| 17    | O3    | 1.117319E-04  | -6.065693E-04 | -3.170937E-04 |
| 18    | C11   | -5.131738E-04 | -1.467344E-05 | -1.449557E-04 |
| 19    | C13   | 1.506194E-04  | -1.626867E-04 | 6.711972E-04  |
| 20    | C12   | 2.988268E-04  | 2.503370E-04  | -2.112694E-04 |
| 21    | H22   | 8.631335E-05  | -5.977836E-05 | 1.479348E-04  |
| 22    | H23   | -3.716078E-04 | 2.483225E-04  | 2.014745E-04  |
| 23    | H24   | -1.494605E-04 | 3.764323E-05  | -3.895866E-05 |
| 24    | C14   | -5.735581E-04 | 2.101926E-04  | -7.218672E-04 |
| 25    | C15   | 1.630419E-04  | -1.328959E-03 | 1.000390E-03  |
| 26    | C16   | -8.973636E-04 | 3.322190E-04  | -8.365044E-04 |
| 27    | C17   | -1.513318E-04 | 9.293124E-04  | -8.141822E-04 |
| 28    | C18   | 6.462099E-04  | -1.721535E-04 | 5.379609E-04  |
| 29    | H1    | -5.679877E-04 | 3.005432E-04  | -7.362391E-04 |
| 30    | H3    | -7.675088E-05 | 4.054183E-04  | -2.425374E-04 |
| 31    | H4    | 3.279025E-04  | -2.465017E-04 | 4.466880E-04  |
| 32    | H5    | -8.358751E-06 | -5.496518E-04 | 1.482894E-04  |
| 33    | H8    | 1.315992E-04  | -3.172845E-05 | 6.681412E-05  |
| total |       | -2.251439E-03 | -3.350834E-04 | -1.468638E-03 |

end of program der1b

start of program geopt 10

geometry optimization step 10  
reading input hessian of dimension 99  
in five columns format  
reading input hessian of dimension 99  
in five columns format  
reading input hessian of dimension 99  
in five columns format

Level shifts adjusted to satisfy step-size constraints  
Step size: 0.0188105  
Cos(theta): 0.5265513

Final level shift: -3.3444606E-02

energy change: 6.0411E-05 . ( 5.0000E-05 )  
gradient maximum: 1.3597E-03 . ( 4.5000E-04 )  
gradient rms: 3.4776E-04 . ( 3.0000E-04 )  
step size: 0.01881 trust radius: 0.01875  
displacement maximum: 9.8315E-03 . ( 1.8000E-03 )  
displacement rms: 1.6758E-03 . ( 1.2000E-03 )  
predicted energy change: -2.5249E-05 geom step: 1.8810E-02  
full step: 1.8810E-02  
molecular structure not yet converged...

center of mass moved by:  
x: 1.1922E-04 y: -9.5973E-04 z: -5.3515E-04

new geometry:

|      | angstroms     |               |               |
|------|---------------|---------------|---------------|
| atom | x             | y             | z             |
| C10  | 0.4455349095  | 0.1842865758  | -1.5275524880 |
| C1   | 0.7777639593  | 0.2770220285  | -0.0871651293 |
| H2   | -1.1834047244 | 0.0157099873  | 0.6913525395  |
| C2   | -0.1465166923 | 0.1638168619  | 0.9310484885  |
| C3   | 2.5316501611  | 0.5361916452  | 1.5786860629  |
| C4   | 0.2317777582  | 0.2274656316  | 2.2709409842  |
| C5   | 2.1243541999  | 0.4860606186  | 0.2616172339  |
| C6   | 1.5770567439  | 0.4031952696  | 2.5717298761  |
| C7   | -0.6895077825 | 0.1126562262  | 3.3839757942  |
| C8   | -0.2480956295 | 0.1739350352  | 4.6384943498  |
| H6   | -1.7367793372 | -0.0228737510 | 3.1769732865  |
| H7   | -0.8878857936 | 0.0937841270  | 5.4950812034  |
| C9   | 1.1773910473  | 0.3588433440  | 4.9245140375  |

|     |               |               |               |
|-----|---------------|---------------|---------------|
| O2  | 1.6515536264  | 0.4236292744  | 6.0068773459  |
| O1  | 2.0015216381  | 0.4622236888  | 3.8503417984  |
| H13 | 3.5651759031  | 0.6802688454  | 1.8269489270  |
| O3  | 3.0690242188  | 0.5963729000  | -0.6843532524 |
| C11 | 1.3620334802  | 0.5666822688  | -2.4048982499 |
| C13 | -0.8833323725 | -0.3433190572 | -1.9561187252 |
| C12 | 2.6932774953  | 1.0944216579  | -1.9533667950 |
| H22 | 1.1792777955  | 0.5084982370  | -3.4634345767 |
| H23 | 2.6927191068  | 2.1839188211  | -1.9186103111 |
| H24 | 3.4808254025  | 0.7866319419  | -2.6275496508 |
| C14 | -3.3530309820 | -1.3394636725 | -2.7855736096 |
| C15 | -1.2716145048 | -1.6398457717 | -1.6251555793 |
| C16 | -1.7487689780 | 0.4460601370  | -2.7023972889 |
| C17 | -2.9774725451 | -0.0491121988 | -3.1151118781 |
| C18 | -2.4949168839 | -2.1352465058 | -2.0403656269 |
| H1  | -0.6088858498 | -2.2601729078 | -1.0474978685 |
| H3  | -1.4628623093 | 1.4524709248  | -2.9506246707 |
| H4  | -3.6386989580 | 0.5756330808  | -3.6889890793 |
| H5  | -2.7786177655 | -3.1403562563 | -1.7834021827 |
| H8  | -4.3061084117 | -1.7235308341 | -3.1039450328 |

nuclear repulsion energy..... 1518.394684456 hartrees

-----  
 / end of geometry optimization iteration 10 /  
 -----

end of program geopt

start of program onee  
 smallest eigenvalue of S: 2.922E-04  
 number of canonical orbitals..... 373  
 end of program onee

start of program probe  
 end of program probe

start of program grid

number of gridpoints:

| atom     | C10 | C1  | H2  | C2  | C3  | C4  | C5  | C6  |
|----------|-----|-----|-----|-----|-----|-----|-----|-----|
| grid # 1 | 92  | 88  | 71  | 86  | 89  | 91  | 83  | 87  |
| grid # 2 | 100 | 98  | 115 | 96  | 97  | 101 | 93  | 95  |
| grid # 3 | 192 | 198 | 209 | 182 | 183 | 199 | 180 | 184 |
| grid # 4 | 340 | 345 | 207 | 327 | 328 | 341 | 315 | 314 |

number of gridpoints:

|          | atom | C7  | C8  | H6  | H7  | C9  | O2  | O1  | H13 |
|----------|------|-----|-----|-----|-----|-----|-----|-----|-----|
| grid # 1 |      | 85  | 88  | 73  | 73  | 79  | 111 | 108 | 73  |
| grid # 2 |      | 93  | 95  | 118 | 118 | 89  | 123 | 118 | 118 |
| grid # 3 |      | 186 | 185 | 219 | 224 | 169 | 270 | 248 | 224 |
| grid # 4 |      | 326 | 333 | 218 | 224 | 284 | 467 | 443 | 222 |

number of gridpoints:

|          | atom | O3  | C11 | C13 | C12 | H22 | H23 | H24 | C14 |
|----------|------|-----|-----|-----|-----|-----|-----|-----|-----|
| grid # 1 |      | 112 | 87  | 92  | 77  | 72  | 69  | 70  | 89  |
| grid # 2 |      | 122 | 94  | 100 | 86  | 114 | 111 | 112 | 97  |
| grid # 3 |      | 250 | 182 | 194 | 156 | 220 | 222 | 219 | 184 |
| grid # 4 |      | 441 | 326 | 338 | 282 | 219 | 226 | 218 | 327 |

number of gridpoints:

|          | atom | C15 | C16 | C17 | C18 | H1  | H3  | H4  | H5  |
|----------|------|-----|-----|-----|-----|-----|-----|-----|-----|
| grid # 1 |      | 88  | 87  | 89  | 89  | 72  | 72  | 73  | 73  |
| grid # 2 |      | 96  | 95  | 97  | 96  | 115 | 115 | 118 | 118 |
| grid # 3 |      | 182 | 183 | 183 | 184 | 219 | 218 | 222 | 222 |
| grid # 4 |      | 325 | 327 | 327 | 327 | 219 | 218 | 224 | 224 |

number of gridpoints:

|          | atom | H8  | total |
|----------|------|-----|-------|
| grid # 1 |      | 73  | 2761  |
| grid # 2 |      | 118 | 3471  |
| grid # 3 |      | 223 | 6715  |
| grid # 4 |      | 224 | 9826  |

end of program grid

start of program rwr

end of program rwr

start of program scf

|      | i | u | d | i | g |                  | RMS     | maximum |
|------|---|---|---|---|---|------------------|---------|---------|
|      | t | p | i | c | r |                  | energy  | DIIS    |
|      | e | d | i | u | i | total energy     | density | error   |
|      | r | t | s | t | d | change           | change  |         |
| etot | 1 | N | N | 1 | U | -913.23018643780 | 2.0E-05 | 3.8E-04 |
| etot | 2 | Y | Y | 4 | M | -913.23022083438 | 3.4E-05 | 1.0E-04 |
| etot | 3 | Y | Y | 4 | M | -913.23022314933 | 2.3E-06 | 3.0E-05 |
| etot | 4 | Y | N | 4 | M | -913.23022343666 | 2.9E-07 | 0.0E+00 |

Energy components, in hartrees:

(A) Nuclear repulsion..... 1518.39468445613  
(E) Total one-electron terms..... -4259.30224209937  
(I) Total two-electron terms..... 1827.67733420658  
(L) Electronic energy..... -2431.62490789279 (E+I)  
(N) Total energy..... -913.23022343666 (A+L)

SCFE: SCF energy: HF -913.23022343666 hartrees iterations: 4

HOMO energy: -0.29111  
LUMO energy: 0.08150

Orbital energies:

|           |           |           |           |           |           |
|-----------|-----------|-----------|-----------|-----------|-----------|
| -20.63025 | -20.60268 | -20.53956 | -11.38180 | -11.32837 | -11.32271 |
| -11.30315 | -11.27823 | -11.26351 | -11.26150 | -11.25447 | -11.25262 |
| -11.25258 | -11.24616 | -11.24402 | -11.24387 | -11.24376 | -11.24301 |
| -11.24262 | -11.24180 | -11.23759 | -1.48714  | -1.43708  | -1.37969  |
| -1.18781  | -1.17068  | -1.12226  | -1.11285  | -1.04451  | -1.03587  |
| -1.02673  | -1.02075  | -0.93903  | -0.89968  | -0.87770  | -0.86547  |
| -0.83972  | -0.83249  | -0.79286  | -0.74657  | -0.72967  | -0.71507  |
| -0.69430  | -0.68737  | -0.67140  | -0.66462  | -0.66117  | -0.64478  |
| -0.63874  | -0.63368  | -0.61856  | -0.61370  | -0.59696  | -0.59513  |
| -0.59074  | -0.58035  | -0.55326  | -0.54137  | -0.52742  | -0.51461  |
| -0.51188  | -0.50901  | -0.50239  | -0.49387  | -0.46612  | -0.44226  |
| -0.43911  | -0.39088  | -0.34888  | -0.34445  | -0.32780  | -0.29111  |
| 0.08150   | 0.09948   | 0.12768   | 0.13244   | 0.16475   | 0.20979   |
| 0.23177   | 0.24169   | 0.25055   | 0.27007   |           |           |

end of program scf

start of program derla  
end of program derla

start of program rwr  
recomputing RWR matrix 15 grid: 4  
end of program rwr

start of program derlb

forces (hartrees/bohr) : total

| atom | label | x            | y             | z             |
|------|-------|--------------|---------------|---------------|
| 1    | C10   | 8.620732E-05 | -9.909690E-05 | -1.369928E-04 |

|       |       |               |               |               |
|-------|-------|---------------|---------------|---------------|
| 2     | C1    | 1.104263E-04  | 8.145467E-05  | -1.371198E-04 |
| 3     | H2    | -6.372607E-05 | -5.888338E-05 | -5.658912E-05 |
| 4     | C2    | -2.173762E-04 | 1.025453E-04  | 1.749147E-04  |
| 5     | C3    | -1.125266E-04 | 9.017172E-05  | 4.314340E-05  |
| 6     | C4    | -4.834746E-05 | -1.109020E-04 | 4.212078E-05  |
| 7     | C5    | 3.547236E-05  | -4.873171E-05 | -1.011800E-04 |
| 8     | C6    | -1.798884E-04 | 1.068366E-04  | 3.057091E-05  |
| 9     | C7    | -2.748926E-05 | 6.344999E-05  | -6.187222E-05 |
| 10    | C8    | -8.931453E-05 | -5.818365E-05 | -5.711735E-05 |
| 11    | H6    | -1.977823E-04 | -6.005729E-05 | -8.221561E-05 |
| 12    | H7    | -9.435839E-05 | -2.718815E-06 | -1.032852E-04 |
| 13    | C9    | 1.910158E-04  | 1.025957E-04  | -2.881088E-04 |
| 14    | O2    | -1.325339E-04 | -2.577218E-05 | -4.107165E-05 |
| 15    | O1    | 1.631217E-05  | -1.455941E-05 | 1.386390E-04  |
| 16    | H13   | -7.672195E-05 | 4.030813E-05  | -3.074379E-05 |
| 17    | O3    | -1.078065E-04 | -4.441720E-04 | -2.023684E-04 |
| 18    | C11   | -1.504413E-04 | -4.663721E-05 | -7.268463E-05 |
| 19    | C13   | 1.625932E-04  | 4.129850E-05  | 1.772447E-04  |
| 20    | C12   | 1.251874E-04  | 3.878743E-04  | 1.701034E-04  |
| 21    | H22   | -8.704595E-06 | -3.169355E-05 | 3.182269E-06  |
| 22    | H23   | -2.691163E-04 | -3.601645E-05 | 7.977054E-05  |
| 23    | H24   | -4.142052E-05 | 5.279533E-05  | -9.191851E-05 |
| 24    | C14   | -3.568834E-04 | -1.506326E-04 | -2.921091E-04 |
| 25    | C15   | -2.070766E-04 | -4.658274E-04 | 2.118800E-04  |
| 26    | C16   | -4.113906E-04 | 1.650209E-04  | -4.630083E-04 |
| 27    | C17   | 1.481010E-04  | 4.191902E-04  | -2.641428E-04 |
| 28    | C18   | 3.343141E-04  | -2.202632E-04 | 3.821882E-04  |
| 29    | H1    | -9.056193E-05 | -1.332836E-04 | -1.070369E-04 |
| 30    | H3    | -7.096161E-05 | 2.412745E-04  | -1.519844E-04 |
| 31    | H4    | -1.164622E-04 | 1.606691E-04  | -1.410977E-04 |
| 32    | H5    | -1.601895E-05 | -2.795747E-04 | 2.319648E-06  |
| 33    | H8    | 2.090398E-05  | -3.771185E-05 | -4.190444E-05 |
| ----- |       | -----         | -----         | -----         |
|       | total | -1.856376E-03 | -2.692329E-04 | -1.468474E-03 |

end of program derlb

start of program geopt 11

geometry optimization step 11

reading input hessian of dimension 99  
in five columns format  
reading input hessian of dimension 99  
in five columns format  
reading input hessian of dimension 99  
in five columns format

Level shifts adjusted to satisfy step-size constraints

Step size: 0.0382490

Cos(theta): 0.4103016

Final level shift: -9.6667240E-03

energy change: -2.1174E-05 \* ( 5.0000E-05 )

gradient maximum: 7.5510E-04 . ( 4.5000E-04 )

gradient rms: 1.7399E-04 \* ( 3.0000E-04 )

step size: 0.03825 trust radius: 0.03750

displacement maximum: 2.1170E-02 . ( 1.8000E-03 )

displacement rms: 3.4075E-03 . ( 1.2000E-03 )

predicted energy change: -2.2396E-05 geom step: 3.8249E-02

full step: 3.8249E-02

molecular structure not yet converged...

center of mass moved by:

x: 1.1463E-03 y: -2.5840E-03 z: -4.1426E-04

new geometry:

|      | angstroms     |               |               |
|------|---------------|---------------|---------------|
| atom | x             | y             | z             |
| C10  | 0.4424522772  | 0.1841118067  | -1.5264583494 |
| C1   | 0.7757181572  | 0.2758147774  | -0.0860283730 |
| H2   | -1.1852679037 | 0.0220399202  | 0.6958168375  |
| C2   | -0.1476000167 | 0.1669038008  | 0.9337966672  |
| C3   | 2.5324767231  | 0.5298472575  | 1.5783163176  |
| C4   | 0.2327629805  | 0.2300800524  | 2.2734150831  |
| C5   | 2.1233800977  | 0.4796749275  | 0.2616940497  |
| C6   | 1.5787472832  | 0.4017010934  | 2.5726433684  |
| C7   | -0.6877531046 | 0.1196758091  | 3.3875822047  |
| C8   | -0.2440449595 | 0.1805498336  | 4.6414251025  |
| H6   | -1.7357065196 | -0.0126055800 | 3.1816286493  |
| H7   | -0.8827142546 | 0.1036237874  | 5.4990352403  |
| C9   | 1.1824705630  | 0.3611258236  | 4.9258675466  |
| O2   | 1.6581519600  | 0.4245359554  | 6.0079518466  |
| O1   | 2.0057126545  | 0.4603962198  | 3.8507158568  |
| H13  | 3.5666845080  | 0.6707821149  | 1.8249851169  |
| O3   | 3.0667410307  | 0.5861187977  | -0.6864335455 |
| C11  | 1.3582691610  | 0.5704284200  | -2.4030100196 |
| C13  | -0.8857928196 | -0.3438989007 | -1.9565242436 |
| C12  | 2.6875554000  | 1.1007935013  | -1.9476796701 |
| H22  | 1.1764611603  | 0.5138463025  | -3.4617219660 |
| H23  | 2.6788823186  | 2.1900617291  | -1.8961834858 |
| H24  | 3.4767351453  | 0.8082613016  | -2.6277912903 |
| C14  | -3.3530221476 | -1.3405483014 | -2.7927601617 |
| C15  | -1.2760808586 | -1.6395212243 | -1.6237091649 |

|     |               |               |               |
|-----|---------------|---------------|---------------|
| C16 | -1.7481740001 | 0.4442516734  | -2.7081215325 |
| C17 | -2.9754356353 | -0.0510812354 | -3.1246437402 |
| C18 | -2.4981079702 | -2.1351599875 | -2.0423055684 |
| H1  | -0.6156721715 | -2.2592733851 | -1.0437130963 |
| H3  | -1.4612681597 | 1.4498634308  | -2.9573682210 |
| H4  | -3.6342442759 | 0.5728567631  | -3.7020878731 |
| H5  | -2.7829076257 | -3.1395381583 | -1.7846772958 |
| H8  | -4.3049886453 | -1.7247366750 | -3.1139522193 |

nuclear repulsion energy..... 1518.228367726 hartrees

-----  
 / end of geometry optimization iteration 11 /  
 -----

end of program geopt

start of program onee  
 smallest eigenvalue of S: 2.921E-04  
 number of canonical orbitals..... 373  
 end of program onee

start of program probe  
 end of program probe

start of program grid

number of gridpoints:

| atom     | C10 | C1  | H2  | C2  | C3  | C4  | C5  | C6  |
|----------|-----|-----|-----|-----|-----|-----|-----|-----|
| grid # 1 | 92  | 88  | 71  | 86  | 89  | 91  | 83  | 87  |
| grid # 2 | 100 | 98  | 115 | 96  | 97  | 101 | 93  | 95  |
| grid # 3 | 192 | 198 | 209 | 182 | 183 | 198 | 181 | 184 |
| grid # 4 | 340 | 345 | 207 | 327 | 328 | 342 | 315 | 314 |

number of gridpoints:

| atom     | C7  | C8  | H6  | H7  | C9  | O2  | O1  | H13 |
|----------|-----|-----|-----|-----|-----|-----|-----|-----|
| grid # 1 | 85  | 88  | 73  | 73  | 79  | 111 | 108 | 73  |
| grid # 2 | 93  | 95  | 118 | 118 | 89  | 123 | 118 | 118 |
| grid # 3 | 186 | 185 | 219 | 224 | 169 | 270 | 248 | 224 |
| grid # 4 | 326 | 333 | 218 | 224 | 284 | 467 | 443 | 222 |

number of gridpoints:

| atom     | O3  | C11 | C13 | C12 | H22 | H23 | H24 | C14 |
|----------|-----|-----|-----|-----|-----|-----|-----|-----|
| grid # 1 | 112 | 87  | 92  | 77  | 72  | 69  | 70  | 89  |
| grid # 2 | 121 | 94  | 100 | 86  | 114 | 111 | 112 | 97  |
| grid # 3 | 250 | 182 | 194 | 156 | 220 | 222 | 219 | 184 |

grid # 4            441        326        338        282        219        226        218        327

number of gridpoints:

|          |     |     |     |     |     |     |     |     |
|----------|-----|-----|-----|-----|-----|-----|-----|-----|
| atom     | C15 | C16 | C17 | C18 | H1  | H3  | H4  | H5  |
| grid # 1 | 88  | 87  | 89  | 89  | 72  | 72  | 73  | 73  |
| grid # 2 | 96  | 95  | 97  | 96  | 115 | 115 | 118 | 118 |
| grid # 3 | 182 | 183 | 183 | 184 | 219 | 218 | 222 | 222 |
| grid # 4 | 326 | 327 | 327 | 327 | 219 | 218 | 224 | 224 |

number of gridpoints:

|          |     |       |
|----------|-----|-------|
| atom     | H8  | total |
| grid # 1 | 73  | 2761  |
| grid # 2 | 118 | 3470  |
| grid # 3 | 223 | 6715  |
| grid # 4 | 224 | 9828  |

end of program grid

start of program rwr

end of program rwr

start of program scf

|      | i | u | d | i | g |                  | energy  | RMS     | maximum |
|------|---|---|---|---|---|------------------|---------|---------|---------|
|      | t | p | i | c | r |                  | change  | density | DIIS    |
|      | e | d | i | u | i |                  |         | change  | error   |
|      | r | t | s | t | d | total energy     |         |         |         |
| etot | 1 | N | N | 1 | U | -913.23004124088 |         | 3.2E-05 | 8.1E-04 |
| etot | 2 | Y | Y | 4 | M | -913.23023010213 | 1.9E-04 | 1.4E-05 | 2.3E-04 |
| etot | 3 | Y | Y | 4 | M | -913.23025452000 | 2.4E-05 | 4.3E-06 | 4.8E-05 |
| etot | 4 | Y | N | 4 | M | -913.23025593997 | 1.4E-06 | 0.0E+00 | 0.0E+00 |

Energy components, in hartrees:

|     |                               |                   |       |
|-----|-------------------------------|-------------------|-------|
| (A) | Nuclear repulsion.....        | 1518.22836772643  |       |
| (E) | Total one-electron terms..... | -4258.96906621940 |       |
| (I) | Total two-electron terms..... | 1827.51044255300  |       |
| (L) | Electronic energy.....        | -2431.45862366640 | (E+I) |
| (N) | Total energy.....             | -913.23025593997  | (A+L) |

SCFE: SCF energy: HF        -913.23025593997 hartrees        iterations:        4

HOMO energy:        -0.29139  
LUMO energy:        0.08132

Orbital energies:

|           |           |           |           |           |           |
|-----------|-----------|-----------|-----------|-----------|-----------|
| -20.63019 | -20.60243 | -20.53981 | -11.38188 | -11.32837 | -11.32249 |
| -11.30319 | -11.27838 | -11.26374 | -11.26160 | -11.25457 | -11.25291 |
| -11.25278 | -11.24630 | -11.24401 | -11.24381 | -11.24370 | -11.24308 |
| -11.24257 | -11.24180 | -11.23764 | -1.48709  | -1.43700  | -1.37960  |
| -1.18780  | -1.17064  | -1.12226  | -1.11279  | -1.04435  | -1.03588  |
| -1.02677  | -1.02065  | -0.93885  | -0.89956  | -0.87778  | -0.86553  |
| -0.83974  | -0.83244  | -0.79272  | -0.74666  | -0.72973  | -0.71518  |
| -0.69456  | -0.68726  | -0.67122  | -0.66459  | -0.66102  | -0.64486  |
| -0.63879  | -0.63352  | -0.61861  | -0.61372  | -0.59706  | -0.59517  |
| -0.59071  | -0.58034  | -0.55315  | -0.54117  | -0.52763  | -0.51463  |
| -0.51173  | -0.50898  | -0.50237  | -0.49391  | -0.46591  | -0.44236  |
| -0.43899  | -0.39111  | -0.34889  | -0.34443  | -0.32773  | -0.29139  |
| 0.08132   | 0.09925   | 0.12758   | 0.13243   | 0.16458   | 0.20967   |
| 0.23186   | 0.24147   | 0.25070   | 0.26987   |           |           |

end of program scf

start of program derla  
end of program derla

start of program rwr  
recomputing RwR matrix 15 grid: 4  
end of program rwr

start of program derlb

forces (hartrees/bohr) : total

| atom | label | x             | y             | z             |
|------|-------|---------------|---------------|---------------|
| 1    | C10   | 7.105191E-05  | 6.355124E-05  | -1.106630E-04 |
| 2    | C1    | 2.650515E-05  | -4.232418E-06 | 9.857618E-05  |
| 3    | H2    | -1.193926E-04 | -5.604243E-05 | -7.919346E-05 |
| 4    | C2    | -9.757664E-05 | 6.855236E-06  | 1.673549E-04  |
| 5    | C3    | -1.245626E-04 | 8.396636E-05  | -2.150910E-04 |
| 6    | C4    | -2.748560E-04 | -3.130623E-05 | -1.770247E-04 |
| 7    | C5    | 1.423330E-04  | 3.113274E-05  | -6.288999E-05 |
| 8    | C6    | 6.755251E-05  | -1.351886E-05 | 1.421630E-04  |
| 9    | C7    | 1.124298E-04  | 1.943110E-05  | 2.696937E-05  |
| 10   | C8    | -1.646614E-04 | 3.939180E-05  | -6.495755E-05 |
| 11   | H6    | -1.457249E-04 | -5.756427E-05 | 8.690313E-06  |
| 12   | H7    | -1.617897E-04 | -2.611056E-05 | -6.363235E-05 |
| 13   | C9    | 3.916835E-04  | -7.740330E-05 | 1.397958E-04  |

|       |       |               |               |               |
|-------|-------|---------------|---------------|---------------|
| 14    | O2    | -4.085586E-04 | 3.464896E-05  | -6.288475E-04 |
| 15    | O1    | -1.972892E-04 | 5.203442E-05  | 9.606488E-06  |
| 16    | H13   | 4.210916E-05  | 4.491448E-05  | -3.761633E-06 |
| 17    | O3    | -3.835374E-05 | -2.720882E-04 | -2.047507E-04 |
| 18    | C11   | -1.967812E-05 | -9.318835E-06 | -1.217529E-04 |
| 19    | C13   | 1.297424E-04  | -1.439419E-05 | 1.766071E-04  |
| 20    | C12   | 2.325316E-04  | 3.725988E-04  | -4.055474E-05 |
| 21    | H22   | -5.853280E-05 | -3.384557E-05 | -1.969156E-05 |
| 22    | H23   | -1.719592E-04 | -3.160637E-04 | -1.040304E-05 |
| 23    | H24   | -4.493733E-04 | 1.377722E-04  | 3.248537E-04  |
| 24    | C14   | -2.023353E-04 | -5.992777E-06 | -3.392522E-04 |
| 25    | C15   | -2.982873E-04 | -1.088399E-04 | -9.892392E-05 |
| 26    | C16   | -3.875618E-04 | -5.928353E-05 | -3.292616E-04 |
| 27    | C17   | 1.074735E-04  | 1.002605E-04  | 4.183304E-05  |
| 28    | C18   | 2.589039E-04  | 8.961431E-05  | 1.888325E-04  |
| 29    | H1    | 1.291197E-04  | -2.886651E-04 | 1.310420E-04  |
| 30    | H3    | 4.325366E-05  | 4.063045E-04  | -1.885338E-04 |
| 31    | H4    | -1.388051E-04 | 1.483352E-04  | -1.611509E-04 |
| 32    | H5    | -1.006920E-04 | -4.350721E-04 | 6.106154E-05  |
| 33    | H8    | -5.458569E-05 | -9.002996E-05 | -2.893379E-05 |
| ----- |       | -----         | -----         | -----         |
|       | total | -1.859886E-03 | -2.689599E-04 | -1.431884E-03 |

end of program derlb

start of program geopt 12

geometry optimization step 12

reading input hessian of dimension 99  
in five columns format  
reading input hessian of dimension 99  
in five columns format  
reading input hessian of dimension 99  
in five columns format

Level shifts adjusted to satisfy step-size constraints

Step size: 0.0537355  
Cos(theta): 0.2695053

Final level shift: -7.6202697E-04

energy change: -3.2503E-05 \* ( 5.0000E-05 )  
gradient maximum: 6.7050E-04 . ( 4.5000E-04 )  
gradient rms: 1.6031E-04 \* ( 3.0000E-04 )  
step size: 0.05373 trust radius: 0.05303  
displacement maximum: 2.8487E-02 . ( 1.8000E-03 )

displacement rms: 4.7871E-03 . ( 1.2000E-03 )  
predicted energy change: -1.4131E-05 geom step: 5.3735E-02  
full step: 5.3735E-02  
molecular structure not yet converged...

center of mass moved by:  
x: 1.1525E-03 y: -3.1465E-03 z: -1.6863E-03

new geometry:

|      | angstroms     |               |               |
|------|---------------|---------------|---------------|
| atom | x             | y             | z             |
| C10  | 0.4402894482  | 0.1855937817  | -1.5257408488 |
| C1   | 0.7751387646  | 0.2725236220  | -0.0851366853 |
| H2   | -1.1864973745 | 0.0273514083  | 0.6978719431  |
| C2   | -0.1479184465 | 0.1677099917  | 0.9351181667  |
| C3   | 2.5348955310  | 0.5186239095  | 1.5773761025  |
| C4   | 0.2340507494  | 0.2302296948  | 2.2741430808  |
| C5   | 2.1242020473  | 0.4689328728  | 0.2615567986  |
| C6   | 1.5810528637  | 0.3966570393  | 2.5723393702  |
| C7   | -0.6861871218 | 0.1258967480  | 3.3890849828  |
| C8   | -0.2418985135 | 0.1896069115  | 4.6423505265  |
| H6   | -1.7346452956 | -0.0040466900 | 3.1843384969  |
| H7   | -0.8806884261 | 0.1175430089  | 5.5003450802  |
| C9   | 1.1851001596  | 0.3666090859  | 4.9252886297  |
| O2   | 1.6608268000  | 0.4343959292  | 6.0067452495  |
| O1   | 2.0086967424  | 0.4574391624  | 3.8499651181  |
| H13  | 3.5699710500  | 0.6554126032  | 1.8232245802  |
| O3   | 3.0653590300  | 0.5693001350  | -0.6896560347 |
| C11  | 1.3550205647  | 0.5780551385  | -2.4009395093 |
| C13  | -0.8872298634 | -0.3432261714 | -1.9566803123 |
| C12  | 2.6817028054  | 1.1095955406  | -1.9389038579 |
| H22  | 1.1740662915  | 0.5254575821  | -3.4599738414 |
| H23  | 2.6645028206  | 2.1969771749  | -1.8641024927 |
| H24  | 3.4710907515  | 0.8362559204  | -2.6251200909 |
| C14  | -3.3530496801 | -1.3414829994 | -2.7965395188 |
| C15  | -1.2788307653 | -1.6380755580 | -1.6214269245 |
| C16  | -1.7477843419 | 0.4432568131  | -2.7126786772 |
| C17  | -2.9746965210 | -0.0528029319 | -3.1295404775 |
| C18  | -2.5000226537 | -2.1344727886 | -2.0418089462 |
| H1   | -0.6199731048 | -2.2571412139 | -1.0383867215 |
| H3   | -1.4595527885 | 1.4485422051  | -2.9647343775 |
| H4   | -3.6323420025 | 0.5704546786  | -3.7087020712 |
| H5   | -2.7858242872 | -3.1385870603 | -1.7822310374 |
| H8   | -4.3045301399 | -1.7266566112 | -3.1182936415 |

nuclear repulsion energy..... 1518.380035455 hartrees

-----  
/ end of geometry optimization iteration 12 /

-----  
end of program geopt

start of program onee  
smallest eigenvalue of S: 2.920E-04  
number of canonical orbitals..... 373  
end of program onee

start of program probe  
end of program probe

start of program grid

number of gridpoints:

| atom     | C10 | C1  | H2  | C2  | C3  | C4  | C5  | C6  |
|----------|-----|-----|-----|-----|-----|-----|-----|-----|
| grid # 1 | 92  | 88  | 71  | 86  | 89  | 91  | 82  | 87  |
| grid # 2 | 100 | 98  | 115 | 96  | 97  | 101 | 93  | 95  |
| grid # 3 | 192 | 198 | 210 | 182 | 183 | 198 | 181 | 184 |
| grid # 4 | 340 | 345 | 207 | 327 | 328 | 341 | 316 | 314 |

number of gridpoints:

| atom     | C7  | C8  | H6  | H7  | C9  | O2  | O1  | H13 |
|----------|-----|-----|-----|-----|-----|-----|-----|-----|
| grid # 1 | 85  | 88  | 73  | 73  | 79  | 111 | 108 | 73  |
| grid # 2 | 93  | 95  | 118 | 118 | 89  | 123 | 118 | 118 |
| grid # 3 | 186 | 185 | 219 | 224 | 169 | 270 | 248 | 224 |
| grid # 4 | 326 | 333 | 218 | 224 | 284 | 467 | 443 | 222 |

number of gridpoints:

| atom     | O3  | C11 | C13 | C12 | H22 | H23 | H24 | C14 |
|----------|-----|-----|-----|-----|-----|-----|-----|-----|
| grid # 1 | 112 | 87  | 92  | 77  | 72  | 69  | 70  | 89  |
| grid # 2 | 121 | 94  | 100 | 85  | 114 | 111 | 112 | 97  |
| grid # 3 | 250 | 182 | 195 | 156 | 220 | 222 | 219 | 184 |
| grid # 4 | 441 | 326 | 338 | 282 | 219 | 226 | 218 | 327 |

number of gridpoints:

| atom     | C15 | C16 | C17 | C18 | H1  | H3  | H4  | H5  |
|----------|-----|-----|-----|-----|-----|-----|-----|-----|
| grid # 1 | 88  | 87  | 89  | 89  | 72  | 72  | 73  | 73  |
| grid # 2 | 96  | 95  | 97  | 96  | 115 | 115 | 118 | 118 |
| grid # 3 | 183 | 183 | 183 | 184 | 219 | 218 | 222 | 222 |
| grid # 4 | 326 | 327 | 327 | 327 | 219 | 218 | 224 | 224 |

number of gridpoints:

| atom     | H8 | total |
|----------|----|-------|
| grid # 1 | 73 | 2760  |

grid # 2        118    3469  
grid # 3        224    6719  
grid # 4        224    9828

end of program grid

start of program rwr  
end of program rwr

start of program scf

|      | i | u | d | i | g |                  | RMS     | maximum |
|------|---|---|---|---|---|------------------|---------|---------|
|      | t | p | i | c | r |                  | density | DIIS    |
|      | e | d | i | u | i | energy           | change  | error   |
|      | r | t | s | t | d | total energy     | change  | error   |
| etot | 1 | N | N | 1 | U | -913.22988307761 |         | 4.3E-05 |
| etot | 2 | Y | Y | 4 | M | -913.23022557035 | 3.4E-04 | 1.9E-05 |
| etot | 3 | Y | Y | 4 | M | -913.23026894554 | 4.3E-05 | 5.5E-06 |
| etot | 4 | Y | Y | 4 | M | -913.23026975462 | 8.1E-07 | 2.1E-06 |
| etot | 5 | Y | N | 4 | M | -913.23027253426 | 2.8E-06 | 0.0E+00 |

Energy components, in hartrees:

|     |                               |                   |       |
|-----|-------------------------------|-------------------|-------|
| (A) | Nuclear repulsion.....        | 1518.38003545499  |       |
| (E) | Total one-electron terms..... | -4259.27355683059 |       |
| (I) | Total two-electron terms..... | 1827.66324884134  |       |
| (L) | Electronic energy.....        | -2431.61030798925 | (E+I) |
| (N) | Total energy.....             | -913.23027253426  | (A+L) |

SCFE: SCF energy: HF        -913.23027253426 hartrees    iterations:    5

HOMO energy:        -0.29170  
LUMO energy:        0.08122

Orbital energies:

|           |           |           |           |           |           |
|-----------|-----------|-----------|-----------|-----------|-----------|
| -20.63032 | -20.60222 | -20.53976 | -11.38188 | -11.32844 | -11.32232 |
| -11.30281 | -11.27835 | -11.26369 | -11.26145 | -11.25451 | -11.25303 |
| -11.25277 | -11.24637 | -11.24401 | -11.24385 | -11.24345 | -11.24308 |
| -11.24257 | -11.24179 | -11.23790 | -1.48737  | -1.43699  | -1.37985  |
| -1.18781  | -1.17056  | -1.12226  | -1.11282  | -1.04421  | -1.03593  |
| -1.02666  | -1.02061  | -0.93874  | -0.89954  | -0.87785  | -0.86558  |
| -0.83966  | -0.83234  | -0.79246  | -0.74693  | -0.72979  | -0.71525  |
| -0.69501  | -0.68712  | -0.67105  | -0.66467  | -0.66089  | -0.64479  |
| -0.63887  | -0.63329  | -0.61867  | -0.61382  | -0.59694  | -0.59531  |

|          |          |          |          |          |          |
|----------|----------|----------|----------|----------|----------|
| -0.59070 | -0.58033 | -0.55318 | -0.54084 | -0.52797 | -0.51466 |
| -0.51164 | -0.50896 | -0.50214 | -0.49403 | -0.46556 | -0.44241 |
| -0.43877 | -0.39148 | -0.34891 | -0.34438 | -0.32768 | -0.29170 |
| 0.08122  | 0.09906  | 0.12753  | 0.13245  | 0.16451  | 0.20967  |
| 0.23189  | 0.24142  | 0.25109  | 0.26979  |          |          |

end of program scf

start of program derla  
end of program derla

start of program rwr  
recomputing Rwr matrix 15 grid: 4  
end of program rwr

start of program derlb

forces (hartrees/bohr) : total

| atom | label | x             | y             | z             |
|------|-------|---------------|---------------|---------------|
| 1    | C10   | 5.672385E-05  | -3.087936E-05 | -7.821212E-05 |
| 2    | C1    | 8.710413E-05  | -8.398250E-06 | -1.364661E-04 |
| 3    | H2    | -7.235973E-05 | -1.510193E-05 | -3.928532E-05 |
| 4    | C2    | -2.573747E-04 | 4.763035E-06  | 1.307452E-04  |
| 5    | C3    | -2.581286E-05 | 1.802792E-05  | -1.681632E-04 |
| 6    | C4    | -1.462051E-04 | -3.868582E-05 | -6.011609E-05 |
| 7    | C5    | 3.563600E-05  | -6.151633E-05 | -9.146851E-05 |
| 8    | C6    | -6.130733E-05 | 4.424807E-05  | 7.654231E-05  |
| 9    | C7    | -6.527798E-05 | 8.216122E-06  | -8.212042E-05 |
| 10   | C8    | -2.567703E-04 | -4.043680E-05 | -8.238759E-06 |
| 11   | H6    | -1.688701E-04 | -1.856182E-05 | -5.412747E-05 |
| 12   | H7    | -1.017805E-04 | -1.195846E-05 | -6.175101E-05 |
| 13   | C9    | 2.679488E-04  | 3.490944E-05  | -7.430515E-05 |
| 14   | O2    | -1.073735E-04 | -1.631822E-05 | 4.995366E-05  |
| 15   | O1    | -1.653586E-04 | -2.066796E-05 | -7.189697E-05 |
| 16   | H13   | -5.390706E-05 | 1.010743E-05  | -2.535526E-05 |
| 17   | O3    | -9.902401E-06 | 2.498916E-04  | -2.152441E-04 |
| 18   | C11   | -1.726762E-04 | 4.387774E-05  | -5.326933E-05 |
| 19   | C13   | 2.402505E-05  | -1.575735E-05 | -2.603058E-05 |
| 20   | C12   | -4.473446E-06 | -2.194929E-04 | 1.710300E-04  |
| 21   | H22   | -6.801397E-05 | -1.084973E-05 | -1.637266E-05 |
| 22   | H23   | -6.569728E-05 | -4.020767E-05 | 3.419042E-05  |
| 23   | H24   | 1.507990E-05  | 8.242854E-05  | -1.252518E-04 |
| 24   | C14   | -1.821625E-04 | -3.283083E-04 | 7.612439E-05  |

|       |       |               |               |               |
|-------|-------|---------------|---------------|---------------|
| 25    | C15   | -2.763069E-04 | -1.616361E-04 | -3.245856E-05 |
| 26    | C16   | -1.729101E-04 | 1.521964E-04  | -1.655187E-04 |
| 27    | C17   | 2.747873E-04  | 3.331163E-04  | -1.609215E-04 |
| 28    | C18   | 1.792908E-04  | -1.067704E-04 | 1.523634E-04  |
| 29    | H1    | 1.973334E-05  | -1.075436E-04 | 4.381919E-05  |
| 30    | H3    | -1.490948E-04 | -9.802435E-05 | -6.550222E-06 |
| 31    | H4    | -2.171847E-04 | 1.775670E-04  | -3.038695E-04 |
| 32    | H5    | 7.135620E-06  | -9.407447E-05 | -3.582860E-05 |
| 33    | H8    | 6.773413E-06  | 6.650941E-06  | -7.057450E-05 |
| ----- |       | -----         | -----         | -----         |
|       | total | -1.826582E-03 | -2.791893E-04 | -1.428628E-03 |

end of program derlb

start of program geopt 13

geometry optimization step 13

reading input hessian of dimension 99  
in five columns format  
reading input hessian of dimension 99  
in five columns format

energy change: -1.6594E-05 \* ( 5.0000E-05 )  
gradient maximum: 5.0964E-04 . ( 4.5000E-04 )  
gradient rms: 1.0911E-04 \* ( 3.0000E-04 )  
step size: 0.02665 trust radius: 0.10607  
displacement maximum: 1.1524E-02 . ( 1.8000E-03 )  
displacement rms: 2.3741E-03 . ( 1.2000E-03 )  
predicted energy change: -4.9019E-06 geom step: 2.6649E-02  
full step: 2.6649E-02  
molecular structure not yet converged...

center of mass moved by:

x: 1.0458E-03 y: -2.6014E-03 z: -5.7192E-04

new geometry:

|      | angstroms     |              |               |
|------|---------------|--------------|---------------|
| atom | x             | y            | z             |
| C10  | 0.4375123300  | 0.1885316910 | -1.5245200489 |
| C1   | 0.7740413901  | 0.2729789400 | -0.0841207441 |
| H2   | -1.1887051608 | 0.0350245892 | 0.7004903086  |
| C2   | -0.1491547125 | 0.1712193202 | 0.9369106791  |
| C3   | 2.5362235361  | 0.5128843530 | 1.5764040903  |
| C4   | 0.2342957093  | 0.2319283157 | 2.2753380786  |
| C5   | 2.1242343025  | 0.4651957569 | 0.2610370682  |
| C6   | 1.5825897804  | 0.3934974082 | 2.5723303388  |

|     |               |               |               |
|-----|---------------|---------------|---------------|
| C7  | -0.6857361002 | 0.1317638562  | 3.3908445989  |
| C8  | -0.2396837792 | 0.1932936013  | 4.6437067473  |
| H6  | -1.7355521146 | 0.0067970763  | 3.1872514460  |
| H7  | -0.8782837320 | 0.1241527955  | 5.5020617197  |
| C9  | 1.1892503531  | 0.3634379652  | 4.9253322771  |
| O2  | 1.6658655590  | 0.4282464166  | 6.0065911861  |
| O1  | 2.0117882190  | 0.4522107005  | 3.8495727351  |
| H13 | 3.5720213290  | 0.6468440235  | 1.8216097620  |
| O3  | 3.0637223119  | 0.5657623886  | -0.6919314216 |
| C11 | 1.3509828771  | 0.5841229310  | -2.3995389033 |
| C13 | -0.8894755513 | -0.3414262633 | -1.9557927658 |
| C12 | 2.6767479261  | 1.1163193582  | -1.9351262645 |
| H22 | 1.1697051204  | 0.5329945085  | -3.4584797871 |
| H23 | 2.6542414250  | 2.2026249119  | -1.8490635084 |
| H24 | 3.4662711933  | 0.8537018404  | -2.6252521201 |
| C14 | -3.3516504097 | -1.3430696824 | -2.8006340632 |
| C15 | -1.2833739234 | -1.6338518878 | -1.6143462974 |
| C16 | -1.7463327030 | 0.4410731098  | -2.7199389716 |
| C17 | -2.9709979410 | -0.0565431200 | -3.1403979175 |
| C18 | -2.5028170397 | -2.1319534450 | -2.0366943138 |
| H1  | -0.6271865834 | -2.2501851304 | -1.0251169156 |
| H3  | -1.4570476992 | 1.4444654151  | -2.9752522023 |
| H4  | -3.6255424628 | 0.5634546505  | -3.7273152358 |
| H5  | -2.7901557154 | -3.1345269796 | -1.7722740135 |
| H8  | -4.3017660304 | -1.7296127566 | -3.1245461969 |

nuclear repulsion energy..... 1518.403055375 hartrees

-----  
 / end of geometry optimization iteration 13 /  
 -----

end of program geopt

start of program onee  
 smallest eigenvalue of S: 2.924E-04  
 number of canonical orbitals..... 373  
 end of program onee

start of program probe  
 end of program probe

start of program grid

number of gridpoints:  
 atom C10 C1 H2 C2 C3 C4 C5 C6

|          |     |     |     |     |     |     |     |     |
|----------|-----|-----|-----|-----|-----|-----|-----|-----|
| grid # 1 | 92  | 88  | 71  | 86  | 89  | 90  | 82  | 87  |
| grid # 2 | 100 | 98  | 115 | 96  | 97  | 99  | 93  | 95  |
| grid # 3 | 192 | 198 | 210 | 183 | 183 | 200 | 182 | 184 |
| grid # 4 | 340 | 344 | 207 | 327 | 328 | 342 | 316 | 314 |

number of gridpoints:

|          |     |     |     |     |     |     |     |     |
|----------|-----|-----|-----|-----|-----|-----|-----|-----|
| atom     | C7  | C8  | H6  | H7  | C9  | O2  | O1  | H13 |
| grid # 1 | 86  | 88  | 73  | 73  | 79  | 111 | 108 | 73  |
| grid # 2 | 93  | 95  | 118 | 118 | 89  | 123 | 118 | 118 |
| grid # 3 | 186 | 185 | 219 | 224 | 169 | 270 | 248 | 224 |
| grid # 4 | 326 | 333 | 218 | 224 | 284 | 467 | 443 | 222 |

number of gridpoints:

|          |     |     |     |     |     |     |     |     |
|----------|-----|-----|-----|-----|-----|-----|-----|-----|
| atom     | O3  | C11 | C13 | C12 | H22 | H23 | H24 | C14 |
| grid # 1 | 111 | 87  | 92  | 77  | 72  | 69  | 70  | 89  |
| grid # 2 | 121 | 94  | 100 | 85  | 114 | 111 | 112 | 97  |
| grid # 3 | 250 | 182 | 195 | 156 | 220 | 222 | 219 | 184 |
| grid # 4 | 441 | 326 | 338 | 282 | 219 | 226 | 218 | 327 |

number of gridpoints:

|          |     |     |     |     |     |     |     |     |
|----------|-----|-----|-----|-----|-----|-----|-----|-----|
| atom     | C15 | C16 | C17 | C18 | H1  | H3  | H4  | H5  |
| grid # 1 | 88  | 87  | 89  | 89  | 72  | 72  | 73  | 73  |
| grid # 2 | 96  | 95  | 97  | 96  | 115 | 115 | 118 | 118 |
| grid # 3 | 183 | 183 | 183 | 184 | 219 | 218 | 223 | 223 |
| grid # 4 | 326 | 327 | 327 | 327 | 219 | 218 | 224 | 224 |

number of gridpoints:

|          |     |       |
|----------|-----|-------|
| atom     | H8  | total |
| grid # 1 | 73  | 2759  |
| grid # 2 | 118 | 3467  |
| grid # 3 | 224 | 6725  |
| grid # 4 | 224 | 9828  |

end of program grid

start of program rwr

end of program rwr

start of program scf

|      |   |   |   |   |              |                  |         |         |
|------|---|---|---|---|--------------|------------------|---------|---------|
| i    | u | d | i | g |              |                  |         |         |
| t    | p | i | c | r |              |                  |         |         |
| e    | d | i | u | i | energy       | RMS              | maximum |         |
| r    | t | s | t | d | change       | density          | DIIS    |         |
|      |   |   |   |   | total energy | change           | error   |         |
| etot | 1 | N | N | 1 | U            | -913.23006149363 | 3.3E-05 | 1.1E-03 |

|      |   |   |   |   |   |                  |         |         |         |
|------|---|---|---|---|---|------------------|---------|---------|---------|
| etot | 2 | Y | Y | 4 | M | -913.23024927460 | 1.9E-04 | 1.5E-05 | 3.9E-04 |
| etot | 3 | Y | Y | 4 | M | -913.23027667728 | 2.7E-05 | 4.7E-06 | 8.8E-05 |
| etot | 4 | Y | N | 4 | M | -913.23027832940 | 1.7E-06 | 0.0E+00 | 0.0E+00 |

Energy components, in hartrees:

|     |                               |                   |       |
|-----|-------------------------------|-------------------|-------|
| (A) | Nuclear repulsion.....        | 1518.40305537516  |       |
| (E) | Total one-electron terms..... | -4259.31791919763 |       |
| (I) | Total two-electron terms..... | 1827.68458549307  |       |
| (L) | Electronic energy.....        | -2431.63333370456 | (E+I) |
| (N) | Total energy.....             | -913.23027832940  | (A+L) |

SCFE: SCF energy: HF      -913.23027832940 hartrees      iterations:      4

HOMO energy:      -0.29175  
LUMO energy:      0.08114

Orbital energies:

|           |           |           |           |           |           |
|-----------|-----------|-----------|-----------|-----------|-----------|
| -20.63056 | -20.60207 | -20.53968 | -11.38211 | -11.32885 | -11.32202 |
| -11.30259 | -11.27854 | -11.26381 | -11.26127 | -11.25443 | -11.25333 |
| -11.25273 | -11.24666 | -11.24391 | -11.24377 | -11.24323 | -11.24298 |
| -11.24253 | -11.24181 | -11.23813 | -1.48767  | -1.43704  | -1.37993  |
| -1.18779  | -1.17058  | -1.12223  | -1.11278  | -1.04408  | -1.03593  |
| -1.02671  | -1.02057  | -0.93860  | -0.89964  | -0.87780  | -0.86558  |
| -0.83968  | -0.83228  | -0.79240  | -0.74703  | -0.72982  | -0.71526  |
| -0.69521  | -0.68709  | -0.67101  | -0.66474  | -0.66092  | -0.64476  |
| -0.63896  | -0.63319  | -0.61874  | -0.61381  | -0.59699  | -0.59537  |
| -0.59068  | -0.58029  | -0.55307  | -0.54067  | -0.52807  | -0.51475  |
| -0.51154  | -0.50896  | -0.50208  | -0.49409  | -0.46542  | -0.44244  |
| -0.43873  | -0.39168  | -0.34894  | -0.34437  | -0.32759  | -0.29175  |
| 0.08114   | 0.09887   | 0.12743   | 0.13255   | 0.16446   | 0.20975   |
| 0.23197   | 0.24131   | 0.25128   | 0.26967   |           |           |

end of program scf

start of program derla  
end of program derla

start of program rwr  
end of program rwr

start of program derlb

forces (hartrees/bohr) : total

| atom  | label | x             | y             | z             |
|-------|-------|---------------|---------------|---------------|
| 1     | C10   | -2.346721E-04 | -1.065659E-04 | -1.161979E-06 |
| 2     | C1    | -1.870942E-04 | -2.639211E-06 | -7.934860E-05 |
| 3     | H2    | 1.203775E-04  | -1.141985E-05 | -4.854501E-05 |
| 4     | C2    | -1.628691E-05 | -6.215413E-07 | -1.764828E-04 |
| 5     | C3    | -7.197567E-05 | -2.391002E-05 | 1.992107E-04  |
| 6     | C4    | 1.613373E-04  | 5.633450E-05  | -4.424155E-05 |
| 7     | C5    | -2.688900E-04 | 5.714289E-05  | -8.329275E-05 |
| 8     | C6    | -1.727915E-04 | -5.017826E-05 | -2.360705E-04 |
| 9     | C7    | -1.459396E-04 | -3.293807E-05 | 1.997696E-04  |
| 10    | C8    | -3.401369E-05 | -5.829828E-05 | -1.190631E-04 |
| 11    | H6    | 2.330182E-04  | 9.303886E-06  | -2.547649E-05 |
| 12    | H7    | -2.375126E-05 | -1.000416E-05 | -1.273723E-05 |
| 13    | C9    | -5.451077E-04 | 8.612723E-05  | 2.420853E-04  |
| 14    | O2    | -1.169389E-04 | -4.575087E-05 | 5.827893E-05  |
| 15    | O1    | -2.766466E-04 | -7.225889E-05 | -3.410677E-04 |
| 16    | H13   | -1.901199E-04 | -9.821430E-06 | -6.209110E-05 |
| 17    | O3    | 6.278168E-05  | 6.590153E-05  | 1.655170E-05  |
| 18    | C11   | 5.984350E-05  | 7.005549E-06  | -7.596209E-05 |
| 19    | C13   | 2.418658E-04  | -2.046137E-05 | 7.823987E-05  |
| 20    | C12   | -1.697942E-04 | -7.606498E-05 | -1.048280E-04 |
| 21    | H22   | -3.961989E-05 | 6.686353E-06  | -8.594606E-05 |
| 22    | H23   | 2.363209E-05  | 1.211834E-04  | -2.772397E-05 |
| 23    | H24   | 1.399645E-05  | 3.296957E-06  | -9.335379E-05 |
| 24    | C14   | -1.831072E-04 | -2.576188E-04 | 3.965808E-06  |
| 25    | C15   | 6.046187E-05  | -2.760181E-04 | 1.362530E-04  |
| 26    | C16   | -1.424697E-04 | -9.663690E-06 | -9.929183E-05 |
| 27    | C17   | -1.817937E-04 | 3.317557E-05  | -1.431146E-04 |
| 28    | C18   | -1.248507E-04 | -1.561336E-04 | -4.987816E-05 |
| 29    | H1    | -4.680559E-05 | -7.843607E-06 | -4.433838E-05 |
| 30    | H3    | 4.855002E-05  | 4.135840E-04  | -1.912623E-04 |
| 31    | H4    | -3.866240E-05 | 1.216914E-05  | -6.410683E-05 |
| 32    | H5    | -1.024062E-05 | 4.174277E-05  | -8.775474E-05 |
| 33    | H8    | -2.876452E-05 | -2.659145E-05 | -7.387541E-05 |
| total |       | -2.224472E-03 | -3.411483E-04 | -1.436660E-03 |

end of program derlb

start of program geopt 14

geometry optimization step 14  
reading input hessian of dimension 99  
in five columns format  
reading input hessian of dimension 99

in five columns format  
reading input hessian of dimension 99  
in five columns format

energy change: -5.7951E-06 \* ( 5.0000E-05 )  
gradient maximum: 4.6540E-04 . ( 4.5000E-04 )  
gradient rms: 1.3945E-04 \* ( 3.0000E-04 )  
step size: 0.01595 trust radius: 0.05303  
displacement maximum: 8.0007E-03 . ( 1.8000E-03 )  
displacement rms: 1.4206E-03 . ( 1.2000E-03 )  
predicted energy change: -3.4075E-06 geom step: 1.5947E-02  
full step: 1.5947E-02  
molecular structure not yet converged...

center of mass moved by:  
x: -6.0805E-04 y: 1.5073E-03 z: 3.4791E-04

new geometry:

|      | angstroms     |               |               |
|------|---------------|---------------|---------------|
| atom | x             | y             | z             |
| C10  | 0.4393464642  | 0.1867779493  | -1.5254001045 |
| C1   | 0.7750961305  | 0.2727957796  | -0.0850501330 |
| H2   | -1.1869694285 | 0.0296107092  | 0.6985655712  |
| C2   | -0.1481699499 | 0.1687643902  | 0.9355832274  |
| C3   | 2.5354234986  | 0.5171689213  | 1.5766807103  |
| C4   | 0.2342208631  | 0.2303022974  | 2.2743202371  |
| C5   | 2.1245396274  | 0.4683205868  | 0.2608624666  |
| C6   | 1.5816022782  | 0.3954060654  | 2.5720217140  |
| C7   | -0.6858102307 | 0.1268051240  | 3.3895437074  |
| C8   | -0.2411608856 | 0.1892442327  | 4.6427993639  |
| H6   | -1.7346374150 | -0.0016854319 | 3.1850601384  |
| H7   | -0.8798343574 | 0.1176165197  | 5.5008997070  |
| C9   | 1.1865673428  | 0.3640696165  | 4.9252930068  |
| O2   | 1.6625877144  | 0.4299497698  | 6.0068366206  |
| O1   | 2.0094885795  | 0.4551042218  | 3.8496039748  |
| H13  | 3.5706613893  | 0.6534399588  | 1.8224372612  |
| O3   | 3.0651207008  | 0.5702572970  | -0.6909832899 |
| C11  | 1.3533710855  | 0.5807248773  | -2.4006789831 |
| C13  | -0.8881055832 | -0.3422721625 | -1.9558475210 |
| C12  | 2.6796351181  | 1.1130864928  | -1.9379239498 |
| H22  | 1.1721257032  | 0.5286438740  | -3.4596700153 |
| H23  | 2.6594115390  | 2.2001049342  | -1.8587042573 |
| H24  | 3.4695818193  | 0.8450036921  | -2.6261592053 |
| C14  | -3.3526300286 | -1.3417056489 | -2.7973082472 |
| C15  | -1.2821617235 | -1.6348759307 | -1.6149169805 |
| C16  | -1.7458249881 | 0.4416210350  | -2.7179629533 |
| C17  | -2.9717921988 | -0.0549933013 | -3.1365267072 |

|     |               |               |               |
|-----|---------------|---------------|---------------|
| C18 | -2.5027664007 | -2.1318207714 | -2.0358081644 |
| H1  | -0.6253808017 | -2.2520857419 | -1.0272854983 |
| H3  | -1.4562872634 | 1.4453433396  | -2.9731632842 |
| H4  | -3.6269797557 | 0.5660690399  | -3.7215870194 |
| H5  | -2.7901001313 | -3.1344739649 | -1.7723802327 |
| H8  | -4.3035187764 | -1.7272834185 | -3.1200873690 |

nuclear repulsion energy..... 1518.398683345 hartrees

-----  
 / end of geometry optimization iteration 14 /  
 -----

end of program geopt

start of program onee  
 smallest eigenvalue of S: 2.922E-04  
 number of canonical orbitals..... 373  
 end of program onee

start of program probe  
 end of program probe

start of program grid

number of gridpoints:

| atom     | C10 | C1  | H2  | C2  | C3  | C4  | C5  | C6  |
|----------|-----|-----|-----|-----|-----|-----|-----|-----|
| grid # 1 | 92  | 88  | 71  | 86  | 89  | 91  | 82  | 87  |
| grid # 2 | 100 | 98  | 115 | 96  | 97  | 101 | 93  | 95  |
| grid # 3 | 192 | 198 | 210 | 183 | 183 | 199 | 181 | 184 |
| grid # 4 | 340 | 344 | 207 | 327 | 328 | 341 | 316 | 314 |

number of gridpoints:

| atom     | C7  | C8  | H6  | H7  | C9  | O2  | O1  | H13 |
|----------|-----|-----|-----|-----|-----|-----|-----|-----|
| grid # 1 | 85  | 88  | 73  | 73  | 79  | 111 | 108 | 73  |
| grid # 2 | 93  | 95  | 118 | 118 | 89  | 123 | 118 | 118 |
| grid # 3 | 186 | 185 | 219 | 224 | 169 | 270 | 248 | 224 |
| grid # 4 | 326 | 333 | 218 | 224 | 284 | 467 | 443 | 222 |

number of gridpoints:

| atom     | O3  | C11 | C13 | C12 | H22 | H23 | H24 | C14 |
|----------|-----|-----|-----|-----|-----|-----|-----|-----|
| grid # 1 | 111 | 87  | 92  | 77  | 72  | 69  | 70  | 89  |
| grid # 2 | 121 | 94  | 100 | 86  | 114 | 111 | 112 | 97  |
| grid # 3 | 250 | 182 | 195 | 156 | 220 | 222 | 219 | 184 |
| grid # 4 | 441 | 326 | 338 | 282 | 219 | 226 | 218 | 327 |

number of gridpoints:

| atom     | C15 | C16 | C17 | C18 | H1  | H3  | H4  | H5  |
|----------|-----|-----|-----|-----|-----|-----|-----|-----|
| grid # 1 | 88  | 87  | 89  | 89  | 72  | 72  | 73  | 73  |
| grid # 2 | 96  | 95  | 97  | 96  | 115 | 115 | 118 | 118 |
| grid # 3 | 183 | 183 | 183 | 184 | 219 | 218 | 223 | 223 |
| grid # 4 | 326 | 327 | 327 | 327 | 219 | 218 | 224 | 224 |

number of gridpoints:

| atom     | H8  | total |
|----------|-----|-------|
| grid # 1 | 73  | 2759  |
| grid # 2 | 118 | 3470  |
| grid # 3 | 224 | 6723  |
| grid # 4 | 224 | 9827  |

end of program grid

start of program rwr

end of program rwr

start of program scf

|      | i | u | d | i | g |                  | RMS     | maximum |
|------|---|---|---|---|---|------------------|---------|---------|
|      | t | p | i | c | r |                  | energy  | DIIS    |
|      | e | d | i | u | i | total energy     | density | error   |
|      | r | t | s | t | d | change           | change  |         |
| etot | 1 | N | N | 1 | U | -913.23022395396 | 1.7E-05 | 3.8E-04 |
| etot | 2 | Y | Y | 4 | M | -913.23027175927 | 4.8E-05 | 1.4E-04 |
| etot | 3 | Y | Y | 4 | M | -913.23027695089 | 5.2E-06 | 3.4E-05 |
| etot | 4 | Y | N | 4 | M | -913.23027900853 | 2.1E-06 | 0.0E+00 |

Energy components, in hartrees:

|     |                               |                   |       |
|-----|-------------------------------|-------------------|-------|
| (A) | Nuclear repulsion.....        | 1518.39868334525  |       |
| (E) | Total one-electron terms..... | -4259.30795059134 |       |
| (I) | Total two-electron terms..... | 1827.67898823755  |       |
| (L) | Electronic energy.....        | -2431.62896235378 | (E+I) |
| (N) | Total energy.....             | -913.23027900853  | (A+L) |

SCFE: SCF energy: HF -913.23027900853 hartrees iterations: 4

HOMO energy: -0.29171

LUMO energy: 0.08118

Orbital energies:

|           |           |           |           |           |           |
|-----------|-----------|-----------|-----------|-----------|-----------|
| -20.63043 | -20.60233 | -20.53987 | -11.38198 | -11.32848 | -11.32240 |
| -11.30279 | -11.27836 | -11.26370 | -11.26142 | -11.25455 | -11.25306 |
| -11.25285 | -11.24646 | -11.24397 | -11.24389 | -11.24341 | -11.24307 |
| -11.24261 | -11.24179 | -11.23805 | -1.48743  | -1.43716  | -1.37988  |
| -1.18782  | -1.17055  | -1.12225  | -1.11279  | -1.04417  | -1.03590  |
| -1.02670  | -1.02060  | -0.93868  | -0.89961  | -0.87782  | -0.86559  |
| -0.83967  | -0.83232  | -0.79248  | -0.74696  | -0.72982  | -0.71523  |
| -0.69510  | -0.68717  | -0.67108  | -0.66469  | -0.66093  | -0.64481  |
| -0.63887  | -0.63322  | -0.61869  | -0.61382  | -0.59700  | -0.59536  |
| -0.59072  | -0.58033  | -0.55311  | -0.54076  | -0.52800  | -0.51471  |
| -0.51160  | -0.50895  | -0.50212  | -0.49406  | -0.46558  | -0.44245  |
| -0.43880  | -0.39159  | -0.34892  | -0.34436  | -0.32761  | -0.29171  |
| 0.08118   | 0.09890   | 0.12742   | 0.13247   | 0.16451   | 0.20975   |
| 0.23193   | 0.24140   | 0.25110   | 0.26976   |           |           |

end of program scf

start of program derla

end of program derla

start of program rwr

end of program rwr

start of program derlb

forces (hartrees/bohr) : total

| atom | label | x             | y             | z             |
|------|-------|---------------|---------------|---------------|
| 1    | C10   | -8.734011E-06 | 2.448429E-07  | -5.133014E-05 |
| 2    | C1    | -3.340506E-05 | 7.926606E-06  | 1.346035E-05  |
| 3    | H2    | -4.906108E-05 | 1.752622E-05  | -5.140438E-05 |
| 4    | C2    | -3.002110E-05 | -1.462056E-05 | -1.597808E-04 |
| 5    | C3    | -1.516700E-05 | -1.518442E-05 | -8.626329E-05 |
| 6    | C4    | -6.029291E-05 | 8.137747E-06  | -5.985064E-05 |
| 7    | C5    | -1.326331E-04 | 3.454682E-05  | -6.153216E-06 |
| 8    | C6    | -3.143840E-05 | -1.272514E-05 | -6.447956E-05 |
| 9    | C7    | -1.749137E-04 | -1.786200E-05 | 2.863292E-05  |
| 10   | C8    | -1.239769E-04 | -1.678009E-06 | -8.987203E-05 |
| 11   | H6    | -7.556937E-05 | 2.114509E-05  | -4.973643E-05 |
| 12   | H7    | -1.001320E-04 | 6.950238E-06  | -4.317043E-05 |
| 13   | C9    | -5.878488E-05 | 8.216576E-06  | 2.434480E-04  |
| 14   | O2    | -1.746193E-04 | -3.445765E-05 | -1.582139E-04 |
| 15   | O1    | -1.818145E-04 | -6.990530E-05 | -7.297756E-05 |
| 16   | H13   | -1.013658E-04 | -1.520219E-05 | -2.352424E-05 |

|       |       |               |               |               |
|-------|-------|---------------|---------------|---------------|
| 17    | O3    | -2.953309E-05 | -1.574078E-04 | 1.636829E-04  |
| 18    | C11   | -6.382848E-05 | -3.770103E-05 | -6.568713E-05 |
| 19    | C13   | 4.831142E-06  | 2.772571E-05  | -8.853616E-05 |
| 20    | C12   | 8.156342E-07  | 1.559643E-04  | -2.197147E-04 |
| 21    | H22   | -4.989484E-05 | 9.033029E-06  | -1.895745E-05 |
| 22    | H23   | -4.739341E-05 | 1.653294E-05  | -7.590605E-05 |
| 23    | H24   | -2.108538E-04 | 4.685400E-05  | 7.875106E-05  |
| 24    | C14   | -9.111564E-05 | -1.068476E-04 | -4.957264E-05 |
| 25    | C15   | -7.585733E-05 | -1.682412E-04 | 2.349501E-05  |
| 26    | C16   | -1.581509E-04 | -4.377353E-05 | -9.110815E-05 |
| 27    | C17   | 5.121443E-05  | 1.157685E-04  | -9.222480E-05 |
| 28    | C18   | 7.586343E-06  | -6.168535E-05 | -3.392868E-05 |
| 29    | H1    | -5.625905E-05 | -1.889178E-05 | -1.037241E-05 |
| 30    | H3    | -2.173426E-05 | 1.224697E-04  | -1.168030E-04 |
| 31    | H4    | -3.990781E-05 | -2.096528E-05 | -1.050303E-04 |
| 32    | H5    | -5.513207E-05 | -8.924201E-05 | -1.299140E-07 |
| 33    | H8    | -4.132210E-05 | -6.299426E-05 | -8.036918E-05 |
| ----- |       | -----         | -----         | -----         |
|       | total | -2.228464E-03 | -3.503427E-04 | -1.413627E-03 |

end of program derlb

start of program geopt 15

geometry optimization step 15

reading input hessian of dimension 99  
in five columns format  
reading input hessian of dimension 99  
in five columns format  
reading input hessian of dimension 99  
in five columns format

energy change: -6.7913E-07 # ( 5.0000E-05 )  
gradient maximum: 3.0309E-04 \* ( 4.5000E-04 )  
gradient rms: 8.8500E-05 \* ( 3.0000E-04 )  
step size: 0.01029 trust radius: 0.05303  
displacement maximum: 3.9750E-03 . ( 1.8000E-03 )  
displacement rms: 9.1678E-04 \* ( 1.2000E-03 )  
predicted energy change: -3.1820E-06 geom step: 1.0291E-02  
full step: 1.0291E-02

\*\*\*\*\*  
\*\* Geometry optimization complete \*\*  
\*\*\*\*\*

center of mass moved by:

x: 0.0000E+00 y: 0.0000E+00 z: 0.0000E+00

final geometry:

|      | angstroms     |               |               |
|------|---------------|---------------|---------------|
| atom | x             | y             | z             |
| C10  | 0.4393464642  | 0.1867779493  | -1.5254001045 |
| C1   | 0.7750961305  | 0.2727957796  | -0.0850501330 |
| H2   | -1.1869694285 | 0.0296107092  | 0.6985655712  |
| C2   | -0.1481699499 | 0.1687643902  | 0.9355832274  |
| C3   | 2.5354234986  | 0.5171689213  | 1.5766807103  |
| C4   | 0.2342208631  | 0.2303022974  | 2.2743202371  |
| C5   | 2.1245396274  | 0.4683205868  | 0.2608624666  |
| C6   | 1.5816022782  | 0.3954060654  | 2.5720217140  |
| C7   | -0.6858102307 | 0.1268051240  | 3.3895437074  |
| C8   | -0.2411608856 | 0.1892442327  | 4.6427993639  |
| H6   | -1.7346374150 | -0.0016854319 | 3.1850601384  |
| H7   | -0.8798343574 | 0.1176165197  | 5.5008997070  |
| C9   | 1.1865673428  | 0.3640696165  | 4.9252930068  |
| O2   | 1.6625877144  | 0.4299497698  | 6.0068366206  |
| O1   | 2.0094885795  | 0.4551042218  | 3.8496039748  |
| H13  | 3.5706613893  | 0.6534399588  | 1.8224372612  |
| O3   | 3.0651207008  | 0.5702572970  | -0.6909832899 |
| C11  | 1.3533710855  | 0.5807248773  | -2.4006789831 |
| C13  | -0.8881055832 | -0.3422721625 | -1.9558475210 |
| C12  | 2.6796351181  | 1.1130864928  | -1.9379239498 |
| H22  | 1.1721257032  | 0.5286438740  | -3.4596700153 |
| H23  | 2.6594115390  | 2.2001049342  | -1.8587042573 |
| H24  | 3.4695818193  | 0.8450036921  | -2.6261592053 |
| C14  | -3.3526300286 | -1.3417056489 | -2.7973082472 |
| C15  | -1.2821617235 | -1.6348759307 | -1.6149169805 |
| C16  | -1.7458249881 | 0.4416210350  | -2.7179629533 |
| C17  | -2.9717921988 | -0.0549933013 | -3.1365267072 |
| C18  | -2.5027664007 | -2.1318207714 | -2.0358081644 |
| H1   | -0.6253808017 | -2.2520857419 | -1.0272854983 |
| H3   | -1.4562872634 | 1.4453433396  | -2.9731632842 |
| H4   | -3.6269797557 | 0.5660690399  | -3.7215870194 |
| H5   | -2.7901001313 | -3.1344739649 | -1.7723802327 |
| H8   | -4.3035187764 | -1.7272834185 | -3.1200873690 |

nuclear repulsion energy..... 1518.398683345 hartrees

-----  
/ end of geometry optimization iteration 15 /  
-----

end of program geopt

start of program post

Writing a SPARTAN archive file  
end of program post

|                   |       |          |           |          |
|-------------------|-------|----------|-----------|----------|
| Total cpu seconds | user: | 1402.188 | user+sys: | 1402.188 |
|-------------------|-------|----------|-----------|----------|
